# Supplementary material for: 8-Oxoguanine DNA Glycosylase (OGG1) Deficiency Exacerbates Doxorubicin-Induced Cardiac Dysfunction
Source: Oxid Med Cell Longev. 2022 Mar 27;2022:9180267. doi: 10.1155/2022/9180267 (PMC8981022; doi:10.1155/2022/9180267)
Supplement: Supplementary 1 — Supplementary Table 1: primer list. [file 9180267.f1.txt]

	Forward	Reverse
		
18s		
Ogg1	GTGTACCGAGGAGACGACAG	AGCAGTCTCACACCTTGGAA
Il-6	AGACAAAGCCAGAGTCCTTCAGAGA	GCCACTCCTTCTGTGACTCCAGC
Col1a2	TCGGGCCTGCTGGTGTTCGTG	TGGGCGCGGCTGTATGAGTTCTTC
c-myc	AACGACAGCAGCTCGCCCAAAT	TGCTCTTCTTCAGAGTCGCTGC
117 bp	CCCAGCTACTACCATCATTCAAGT	GATGGTTTGGGAGATTGGTTGATGT
10 kb	GAGAGATTTTATGGGTGTAATGCGG	GCCAGCCTGACCCATAGCCATAATAT
