# Supplementary material for: 8-Oxoguanine DNA Glycosylase (OGG1) Deficiency Exacerbates Doxorubicin-Induced Cardiac Dysfunction
Source: Oxid Med Cell Longev. 2022 Mar 27;2022:9180267. doi: 10.1155/2022/9180267 (PMC8981022; doi:10.1155/2022/9180267)
Supplement: Supplementary 2 — Supplementary Table 2: differentially expressed genes between 4-week-old WT and KO CMs. [file 9180267.f2.txt]

gene_id	gene	locus	sample_1	sample_2	status	Average Value WT	Average Value KO	log2(fold_change)	p_value
ENSMUSG00000030271.8	Ogg1	chr6:113276965-113293978	WT	KO	OK	2.25109	0.0286178	-6.29757	0.0128
ENSMUSG00000041298.9	Katnal1	chr5:149685907-149827389	WT	KO	OK	14.935	4.58612	-1.70335	0.00005
ENSMUSG00000022602.7	Arc	chr15:74499512-74503000	WT	KO	OK	1.86775	0.69553	-1.42511	0.00015
ENSMUSG00000046027.10	Stard5	chr7:90780468-90894236	WT	KO	OK	1.9323	0.734614	-1.39526	0.0192
ENSMUSG00000042745.9	Id1	chr2:152561986-152563146	WT	KO	OK	1.90176	0.813308	-1.22546	0.01885
ENSMUSG00000090877.2	Hspa1b	chr17:35093380-35096183	WT	KO	OK	6.79912	3.11234	-1.12735	0.00005
ENSMUSG00000003545.2	Fosb	chr7:19888069-19895394	WT	KO	OK	2.36961	1.10664	-1.09847	0.00025
ENSMUSG00000071226.5	Cecr2	chr6:120616386-120721208	WT	KO	OK	4.91247	2.36054	-1.05733	0.01515
ENSMUSG00000091971.1	Hspa1a	chr17:35106143-35109081	WT	KO	OK	7.60183	3.69795	-1.03962	0.00005
ENSMUSG00000091017.1	Fam71a	chr1:192986462-192988696	WT	KO	OK	1.45084	0.753341	-0.945515	0.01795
ENSMUSG00000075602.4	Ly6a	chr15:74825307-74828064	WT	KO	OK	5.46271	2.86756	-0.929795	0.01305
ENSMUSG00000020108.3	Ddit4	chr10:59412422-59414518	WT	KO	OK	4.94502	2.67401	-0.886972	0.0025
ENSMUSG00000048107.8	Kctd12	chr14:103377436-103381745	WT	KO	OK	1.01937	0.557537	-0.87054	0.019
ENSMUSG00000062515.2	Fabp4	chr3:10204346-10208576	WT	KO	OK	36.7438	20.6384	-0.832167	0.00055
ENSMUSG00000027381.10	Bcl2l11	chr2:127951773-127988283	WT	KO	OK	3.56566	2.04687	-0.800751	0.00275
ENSMUSG00000037001.9	Zfp39	chr11:58701654-58717727	WT	KO	OK	1.86851	1.09868	-0.766114	0.01725
ENSMUSG00000026678.5	Rgs5	chr1:171585631-171625944	WT	KO	OK	6.28934	3.74784	-0.746849	0.0007
ENSMUSG00000005483.8	Dnajb1	chr8:86132073-86135801	WT	KO	OK	115.734	70.9606	-0.705717	0.00005
ENSMUSG00000035649.11	Zcchc7	chr4:44768748-44945087	WT	KO	OK	3.87658	2.39217	-0.696466	0.0173
ENSMUSG00000021701.7	Plk2	chr13:111185251-111191052	WT	KO	OK	8.28068	5.44863	-0.603856	0.00445
ENSMUSG00000038463.8	Olfml2b	chr1:172574662-172612920	WT	KO	OK	5.18749	3.44022	-0.592537	0.01435
ENSMUSG00000039220.9	Ppp1r10	chr17:36053378-36069226	WT	KO	OK	12.3201	8.23951	-0.580389	0.00435
ENSMUSG00000028525.9	Pde4b	chr4:101760147-102279864	WT	KO	OK	35.3124	23.6454	-0.578611	0.00495
ENSMUSG00000053560.4	Ier2	chr8:87185229-87186751	WT	KO	OK	18.3351	12.3346	-0.571901	0.0059
ENSMUSG00000037369.9	Kdm6a	chrX:17739700-17857062	WT	KO	OK	5.74449	3.86535	-0.57158	0.005
ENSMUSG00000026628.8	Atf3	chr1:192994174-193007219	WT	KO	OK	392.829	264.475	-0.570767	0.0018
ENSMUSG00000052684.3	Jun	chr4:94715724-94834009	WT	KO	OK	48.125	33.1376	-0.538316	0.0025
ENSMUSG00000023034.6	Nr4a1	chr15:101097276-101105223	WT	KO	OK	38.5392	26.5478	-0.537733	0.0025
ENSMUSG00000048546.7	Tob2	chr15:81678699-81689226	WT	KO	OK	14.0232	9.86205	-0.507851	0.0076
ENSMUSG00000050195.8	Scd4	chr19:44407581-44421233	WT	KO	OK	3.83489	5.66173	0.562057	0.01135
ENSMUSG00000041688.10	Amot	chrX:141880967-141939724	WT	KO	OK	1.99012	3.05646	0.619004	0.0132
ENSMUSG00000024164.8	C3	chr17:57343396-57367559	WT	KO	OK	2.5534	3.98291	0.641403	0.00445
ENSMUSG00000041616.9	Nppa	chr4:147374830-147378123	WT	KO	OK	34.5762	55.4862	0.682352	0.0025
ENSMUSG00000065232.1	U2	chr12:60141321-60141512	WT	KO	OK	83.3881	144.906	0.797204	0.0129
ENSMUSG00000030972.5	Acsm5	chr7:126669817-126687307	WT	KO	OK	1.36815	2.43501	0.831696	0.005
ENSMUSG00000028024.7	Enpep	chr3:128972092-129035638	WT	KO	OK	1.01733	2.07637	1.02927	0.0048
ENSMUSG00000069045.5	Ddx3y	chrY:597157-623056	WT	KO	OK	13.9729	29.0876	1.05777	0.00005
ENSMUSG00000061086.6	Myl4	chr11:104411976-104457067	WT	KO	OK	7.61442	17.0351	1.1617	0.00015
ENSMUSG00000070031.5	Sp140	chr1:87496952-87606573	WT	KO	OK	1.35044	3.22436	1.25558	0.0041
ENSMUSG00000020469.8	Myl7	chr11:5796639-5798785	WT	KO	OK	12.2192	30.0013	1.29587	0.00005
ENSMUSG00000054874.6	Pcnxl3	chr19:5664634-5688908	WT	KO	OK	0.671366	1.67494	1.31894	0.0063
ENSMUSG00000042045.5	Sln	chr9:53698057-53701651	WT	KO	OK	4.85465	12.34	1.3459	0.0015
ENSMUSG00000029229.7	Chic2	chr5:75397050-75440799	WT	KO	OK	1.07816	2.99598	1.47446	0.01915
ENSMUSG00000028307.9	Aldob	chr4:49548866-49562418	WT	KO	OK	1.87836	5.28004	1.49108	0.00005
ENSMUSG00000068745.5	Mybphl	chr3:108167828-108186659	WT	KO	OK	0.519145	1.67381	1.68893	0.00845
ENSMUSG00000024112.9	Cacna1h	chr17:25506217-25570728	WT	KO	OK	0.459893	1.68688	1.87499	0.00465
ENSMUSG00000004626.8	Stxbp2	chr8:3630954-3643644	WT	KO	OK	0.186995	1.45595	2.96089	0.0015
