# Supplementary material for: 8-Oxoguanine DNA Glycosylase (OGG1) Deficiency Exacerbates Doxorubicin-Induced Cardiac Dysfunction
Source: Oxid Med Cell Longev. 2022 Mar 27;2022:9180267. doi: 10.1155/2022/9180267 (PMC8981022; doi:10.1155/2022/9180267)
Supplement: Supplementary 3 — Supplementary Table 3: differentially expressed genes between KO saline-treated and WT saline-treated CMs. [file 9180267.f3.txt]

	logFC	logCPM	LR	PValue	FDR	hgnc	biotype	WT_Saline3	WT_Saline1	KO_Saline2	KO_Saline1
ENSMUSG00000032315.5	4.934675434	0.441700267	30.42335865	3.47321E-08	3.10709E-05	Cyp1a1	protein_coding	0.033252467	0.04159062	0.330460662	1.697421685
ENSMUSG00000071586.4	2.438523987	-2.415805339	10.40415506	0.001257321	0.063134126	Gm10337	protein_coding	0.794409555	0	1.92983653	1.85168119
ENSMUSG00000058773.2	2.31932399	-0.825548353	26.8929768	2.15039E-07	0.000121123	Hist1h1b	protein_coding	0.468223421	0.256213912	1.163292787	1.882625727
ENSMUSG00000049539.1	2.142959952	-0.674002453	18.81266322	1.44206E-05	0.003735666	Hist1h1a	protein_coding	0.34928463	0.473274491	1.774151448	1.506166416
ENSMUSG00000078922.3	2.116975191	1.993342587	27.88301704	1.28876E-07	7.53825E-05	Tgtp1	protein_coding	0.786881567	0.449675026	2.534749932	1.916354091
ENSMUSG00000074403.2	2.087866982	-1.083919719	16.3199976	5.34964E-05	0.00884319	Hist2h3b	protein_coding	0.356695871	0.390371094	1.358847003	1.496553832
ENSMUSG00000037169.8	1.981764181	0.423042591	16.3689528	5.21322E-05	0.008712382	Mycn	protein_coding	0.237743005	0.206498439	1.085079509	0.397142815
ENSMUSG00000061100.3	1.962453458	-1.173514966	17.97812832	2.23458E-05	0.004764702	Retnla	protein_coding	0.292442575	0.777268467	1.550012567	1.942706595
ENSMUSG00000073421.4	1.959714247	2.598998399	48.34205573	3.57992E-12	1.81478E-08	H2-Ab1	protein_coding	2.838586615	2.173357594	7.698340515	8.978561157
ENSMUSG00000074151.5	1.91441995	2.028914184	37.50460468	9.11974E-10	1.73366E-06	Nlrc5	lincRNA	0.419302147	0.157333012	1.039764464	0.712067194
ENSMUSG00000078921.3	1.913510246	2.58417605	28.42596346	9.73509E-08	6.43701E-05	Tgtp2	protein_coding	1.376074336	0.943844912	4.548639945	2.783262943
ENSMUSG00000079547.2	1.866621111	-0.656188221	20.43143085	6.18063E-06	0.001773492	H2-DMb1	protein_coding	0.295225849	0.24001548	0.645465379	1.032208413
ENSMUSG00000024610.8	1.859742757	4.082648771	26.2068744	3.06729E-07	0.000166597	Cd74	protein_coding	7.656422138	8.00609039	24.52098307	25.83736277
ENSMUSG00000063021.2	1.832099471	-1.618091314	10.03658752	0.001534612	0.072479454	Hist1h2ak	protein_coding	0.339279081	0.318265719	1.123910479	0.77105162
ENSMUSG00000073409.5	1.736356797	3.44217552	30.0597386	4.18939E-08	3.53957E-05	H2-Q6	protein_coding	3.964439898	1.950692573	9.43959808	6.627954673
ENSMUSG00000055413.9	1.715186738	1.384105855	31.12936803	2.41391E-08	2.44739E-05	H2-Q8	processed_transcript	1.24761794	0.697227589	2.725963803	2.580129854
ENSMUSG00000062727.3	1.711616422	-1.874095066	8.615150972	0.003333782	0.120714645	Hist1h2bk	protein_coding	0.454264878	0.227269244	0.662119646	1.207079202
ENSMUSG00000089995.1	1.698204463	-1.001019911	12.94851218	0.000320176	0.028765839	Gm15716	processed_transcript	0.763804162	0.545903008	1.445834587	2.289012928
ENSMUSG00000021822.2	1.696026475	0.654130943	12.56151758	0.000393772	0.033269346	Plau	protein_coding	0.540053151	0.291152173	1.110415842	1.145946095
ENSMUSG00000060586.8	1.670628207	2.839674624	17.46889198	2.92048E-05	0.005622099	H2-Eb1	protein_coding	4.225201411	4.825145245	12.6334384	13.0770676
ENSMUSG00000015396.2	1.656822821	0.925977114	20.86939986	4.91687E-06	0.001466191	Cd83	protein_coding	0.660941163	0.425494008	1.545502682	1.332149511
ENSMUSG00000036594.7	1.640518841	3.167169869	17.90504566	2.32205E-05	0.00478367	H2-Aa	protein_coding	3.446993127	3.597357312	9.22220255	10.25558027
ENSMUSG00000047945.6	1.636668648	0.841828556	28.69503389	8.47207E-08	5.85651E-05	Marcksl1	protein_coding	0.731471306	0.47438733	1.435913077	1.704979062
ENSMUSG00000060550.8	1.59868762	3.343872626	33.04443563	9.00765E-09	1.22464E-05	H2-Q7	protein_coding	2.039817864	0.918470914	3.925926469	3.344854636
ENSMUSG00000062417.5	1.584332842	-0.528918958	10.55491237	0.001158797	0.060979189	Hist1h3g	protein_coding	0.738845938	0.616075796	0.761454661	2.870280862
ENSMUSG00000044338.7	1.582747821	3.246959249	10.93251752	0.00094491	0.055698422	Aplnr	protein_coding	1.146043206	2.470356707	6.155066396	4.109255887
ENSMUSG00000078437.1	1.533193447	-1.079161089	10.61210605	0.001123497	0.059741731	Gm3055	protein_coding	0.476573085	0.260782884	0.828826164	1.083068394
ENSMUSG00000024401.8	1.485901431	0.353754175	16.10347658	5.99738E-05	0.009587529	Tnf	protein_coding	0.557787259	0.315605394	1.302223861	0.742937529
ENSMUSG00000073057.2	1.43060243	-1.286650732	6.796700682	0.009132648	0.20195816	Gm10462	protein_coding	1.089096485	0.170273822	1.352920452	1.523138383
ENSMUSG00000079363.2	1.422931655	2.999417193	21.17553055	4.19081E-06	0.001327789	Gbp4	protein_coding	1.429363956	1.055870718	3.298591604	2.341127117
ENSMUSG00000041859.9	1.415170996	1.048155813	18.2768039	1.91019E-05	0.004272085	Mcm3	protein_coding	0.525688636	0.374413471	0.851360299	1.194689263
ENSMUSG00000018008.6	1.388427622	0.913210132	10.5267776	0.001176572	0.061445131	Cyth4	protein_coding	0.734738283	0.283513882	0.890713215	1.257116891
ENSMUSG00000033578.7	1.365259237	0.372624396	8.156524453	0.004290652	0.137832512	Tmem35	protein_coding	0.65730895	0.326017493	0.495553013	1.632494711
ENSMUSG00000052384.7	1.362937472	1.498020534	21.07607113	4.41406E-06	0.00136998	Lrrc33	protein_coding	0.624709504	0.358122059	0.993330998	1.106658084
ENSMUSG00000078606.1	1.348176295	4.87020279	17.79101947	2.46544E-05	0.004999259	Gm4070	protein_coding	2.946249819	1.704326599	5.650966991	4.137598787
ENSMUSG00000026278.8	1.31395474	0.202404462	8.316654155	0.003928321	0.130316323	Bok	protein_coding	0.699956281	0.342576135	0.826668843	1.361965366
ENSMUSG00000035692.6	1.292319114	0.195206251	11.76334303	0.000604086	0.043831243	Isg15	protein_coding	1.036736077	0.684369786	1.869805445	1.691562339
ENSMUSG00000037206.7	1.279995424	1.944139411	6.717346284	0.009547959	0.207140319	Islr	protein_coding	1.09695645	1.372021454	1.946692035	3.465491923
ENSMUSG00000031875.6	1.279497106	1.153225271	13.56696807	0.000230201	0.023070343	Cmtm3	protein_coding	0.916537901	0.927204908	1.946716202	1.903863888
ENSMUSG00000039377.6	1.277761519	0.680704102	9.998054689	0.001567057	0.073328611	Hlx	protein_coding	0.420145071	0.477725148	1.088127226	0.787900932
ENSMUSG00000018986.8	1.275213011	0.39335003	8.499057874	0.003553304	0.125379699	Slfn3	protein_coding	0.55093084	0.329559207	0.650665438	1.122243404
ENSMUSG00000050014.6	1.272327644	1.173777226	12.53744632	0.000398877	0.033368856	Apol10b	protein_coding	1.336574703	0.64402508	2.424289648	1.470881365
ENSMUSG00000000317.5	1.268353225	2.894936533	14.32761125	0.000153595	0.018107592	Bcl6b	protein_coding	1.603665218	1.376234727	3.714781634	2.463784104
ENSMUSG00000045868.5	1.264980722	4.891826872	13.55155497	0.000232099	0.023070343	Gvin1	protein_coding	3.162308139	1.759602056	5.829898013	3.89380666
ENSMUSG00000040253.9	1.264358358	3.213601422	14.98815621	0.000108188	0.014957492	Gbp7	protein_coding	1.46561705	0.882252561	2.710528879	1.972987862
ENSMUSG00000028339.11	1.260815069	3.732280668	7.970387764	0.004754875	0.144914112	Col15a1	protein_coding	1.274651536	1.783863448	3.218203448	3.488199552
ENSMUSG00000034459.8	1.254245135	1.909741288	9.464574813	0.00209478	0.086867806	Ifit1	protein_coding	0.621798586	0.521888624	1.485221866	0.846722039
ENSMUSG00000028268.8	1.24984018	2.282392313	14.60046093	0.000132882	0.016982101	Gbp3	protein_coding	1.30619816	0.951606275	2.587259349	1.958590659
ENSMUSG00000024440.6	1.243923938	3.32033348	9.483755454	0.002072992	0.086610057	Pcdh12	protein_coding	1.188756744	1.48207542	3.261411115	2.413846271
ENSMUSG00000037321.9	1.232676903	2.39798422	16.82714116	4.09435E-05	0.007240338	Tap1	protein_coding	0.802158002	0.432114977	1.299691065	1.105184113
ENSMUSG00000020826.6	1.203857101	1.635702665	8.405333974	0.003741217	0.128145094	Nos2	protein_coding	0.531768029	0.560779357	1.478326812	0.714531094
ENSMUSG00000029581.8	1.194383056	2.457186225	9.827787074	0.00171895	0.077572097	Fscn1	protein_coding	1.257726978	1.338043892	3.122405891	2.092572338
ENSMUSG00000029561.10	1.191655992	1.658782574	14.08761289	0.000174489	0.020103262	Oasl2	protein_coding	0.482032024	0.406608965	1.039776757	0.68981577
ENSMUSG00000026697.9	1.188568496	0.153334559	11.69939035	0.000625206	0.044221563	Myoc	protein_coding	0.543892476	0.379384184	0.651391661	1.140978121
ENSMUSG00000020676.2	1.181364345	-0.376860138	7.469315416	0.006275941	0.163153905	Ccl11	protein_coding	0.724466174	0.327212948	0.559976157	1.435353241
ENSMUSG00000042286.7	1.173664894	4.564343309	7.80879301	0.005199262	0.150671523	Stab1	protein_coding	2.36453972	1.165460232	2.989711739	3.517651246
ENSMUSG00000073411.4	1.171928072	6.133696961	12.86080542	0.000335536	0.029326631	H2-D1	protein_coding	23.06834844	14.47901447	38.13614196	32.59131077
ENSMUSG00000069308.7	1.16160011	-0.012034441	7.303011377	0.006883914	0.172940181	Hist1h2bp	protein_coding	0.801932373	0.81013092	0.980867327	2.07051624
ENSMUSG00000021806.3	1.149356728	2.485112779	7.923187542	0.004880521	0.146378333	Nid2	protein_coding	0.696558162	0.820959321	1.50871635	1.498708033
ENSMUSG00000040264.7	1.128295608	1.532117537	14.3825408	0.000149179	0.018099548	Gbp5	protein_coding	0.627349413	0.432915362	1.046258483	0.922750616
ENSMUSG00000025969.9	1.12730012	4.072737762	9.388984797	0.002182931	0.088764726	Nrp2	protein_coding	1.477942715	1.270514335	2.937537974	2.255730473
ENSMUSG00000027533.9	1.106044049	2.945833387	9.662443581	0.001880733	0.081872933	Fabp5	protein_coding	1.961251976	1.554100878	3.559186465	2.904724232
ENSMUSG00000032014.5	1.096510821	0.822339827	6.76115526	0.009316343	0.204714068	Oaf	protein_coding	0.491840815	0.432898338	0.699992567	1.019046024
ENSMUSG00000061232.8	1.088553261	6.073242368	17.27222664	3.23886E-05	0.006120566	H2-K1	protein_coding	22.75659364	13.76192543	34.88466143	29.74925369
ENSMUSG00000060802.8	1.084904051	6.130715731	17.71314814	2.56845E-05	0.005135992	B2m	protein_coding	74.93311435	47.24213385	118.8193957	97.80770405
ENSMUSG00000035929.10	1.0831782	3.775919584	14.34743477	0.000151987	0.018107592	H2-Q4	protein_coding	4.926811474	2.815850566	7.425408859	6.137398
ENSMUSG00000074896.3	1.082412115	2.534427774	7.574973886	0.005918424	0.159109817	Ifit3	protein_coding	2.018155771	1.32443336	4.225851817	1.655145894
ENSMUSG00000041187.9	1.074117661	2.202576028	7.696553317	0.005532637	0.153821482	Prkd2	protein_coding	1.089995673	0.774937084	1.85479377	1.468233973
ENSMUSG00000054435.8	1.070119684	2.582761272	7.436365494	0.006391885	0.165380332	Gimap4	protein_coding	3.122254547	2.351976728	5.234141701	4.56505977
ENSMUSG00000037010.7	1.057712286	2.265766655	10.32762216	0.001310539	0.064500591	Apln	protein_coding	1.380410754	1.269016267	2.77112168	1.998120567
ENSMUSG00000038725.5	1.015670949	3.62923446	7.360244458	0.006668173	0.170410956	Pkhd1l1	protein_coding	1.055201836	0.394225003	1.237046309	1.090031953
ENSMUSG00000067212.7	1.014081782	3.267986413	10.99183885	0.00091514	0.054941041	H2-T23	protein_coding	3.06973505	1.722119703	3.808366376	4.229994369
ENSMUSG00000024338.8	0.99254383	2.107358839	8.100238	0.004425945	0.139869042	Psmb8	protein_coding	1.368052791	1.08435734	2.012993656	2.169112251
ENSMUSG00000020641.8	0.990225229	2.847488844	7.096116644	0.007725115	0.185521833	Rsad2	protein_coding	1.326958182	1.112751254	2.351054218	1.827677915
ENSMUSG00000028270.6	0.989318657	3.143999072	7.020518929	0.008058087	0.189785673	Gbp2	protein_coding	3.033872817	2.363509412	5.559161838	3.58834378
ENSMUSG00000038543.7	0.983250016	0.217558691	7.878805029	0.005001752	0.148037957	BC028528	protein_coding	0.715499723	0.68091233	1.009909245	1.392209582
ENSMUSG00000004891.10	0.979408761	4.331543881	6.756267451	0.009341897	0.204714068	Nes	protein_coding	2.072502033	2.092386975	4.348124285	2.860575982
ENSMUSG00000038587.7	0.972546968	4.257616621	10.99375329	0.000914195	0.054941041	Akap12	protein_coding	2.484566806	2.184880558	4.265096178	3.679148087
ENSMUSG00000040296.8	0.962549747	2.628181227	8.995530728	0.002706407	0.103414654	Ddx58	protein_coding	0.883129166	0.502080163	1.215204232	1.014843474
ENSMUSG00000031799.9	0.955252005	4.740622534	7.763781529	0.005330424	0.151477778	Tpm4	protein_coding	10.07507323	9.754346234	18.14977113	15.61286266
ENSMUSG00000069874.5	0.936157736	3.499062879	18.52660487	1.67549E-05	0.004035146	Irgm2	protein_coding	2.714232646	2.088527113	4.201457055	3.629764452
ENSMUSG00000032119.4	0.933832734	1.377028608	12.21700847	0.000473558	0.037972089	Hinfp	protein_coding	1.350622943	0.597750734	1.48678837	1.583763299
ENSMUSG00000030123.8	0.930364031	5.489738942	9.802842174	0.001742424	0.07816749	Plxnd1	protein_coding	5.516461654	4.436625305	8.507795012	7.812562767
ENSMUSG00000032596.7	0.919682875	3.390673002	9.613144889	0.001931895	0.082528825	Uba7	protein_coding	3.456520402	1.858998743	4.699169546	3.557868933
ENSMUSG00000029070.3	0.915861671	2.488375998	7.174891394	0.007393092	0.180567548	Mxra8	protein_coding	1.805137204	1.23151668	1.858178068	3.025281944
ENSMUSG00000050666.7	0.91283415	1.828830511	13.91771951	0.000190989	0.020884879	E130203B14Rik	protein_coding	1.223539927	0.854608863	1.673898725	1.62227056
ENSMUSG00000021256.4	0.907484169	2.627974364	7.024778072	0.008038943	0.189785673	Vash1	protein_coding	0.930343284	1.059341999	1.907286078	1.393176785
ENSMUSG00000046718.7	0.9071292	2.253501988	9.438727647	0.002124508	0.087323034	Bst2	protein_coding	5.664485521	3.828693266	7.695306956	7.321825543
ENSMUSG00000036862.8	0.900714107	2.815319927	6.665307076	0.009830771	0.20998086	Dchs1	protein_coding	0.503054159	0.521053306	1.015486174	0.665063557
ENSMUSG00000079179.2	0.895789213	0.409016604	7.02648094	0.008031302	0.189785673	1700012B15Rik	protein_coding	1.295509226	0.951081992	1.530034292	1.969362614
ENSMUSG00000020473.7	0.895366187	2.965010103	9.753122561	0.001790184	0.079605598	Aebp1	protein_coding	1.849818782	1.042494941	1.802710102	2.684800156
ENSMUSG00000048489.6	0.894350603	4.70487765	9.783945619	0.001760421	0.078742617	8430408G22Rik	protein_coding	17.99856173	8.798171413	19.84509673	20.78388925
ENSMUSG00000022443.9	0.894330612	6.083024577	10.29357159	0.001334945	0.065489794	Myh9	protein_coding	4.997541105	3.492040345	7.066324411	6.291721576
ENSMUSG00000037278.9	0.88686412	0.807242301	7.974984358	0.004742817	0.144836857	Tmem97	protein_coding	0.854627189	0.692823333	1.174371766	1.239492715
ENSMUSG00000020099.6	0.884131995	3.117027397	6.969936315	0.008289045	0.193640233	Unc5b	protein_coding	1.287574287	1.065867438	2.051276271	1.691424292
ENSMUSG00000020658.8	0.879588615	2.941627797	7.015214857	0.008081993	0.189970565	Efr3b	protein_coding	1.244786032	0.7992743	1.578849596	1.582614089
ENSMUSG00000079523.2	0.87851345	2.03376711	7.415827776	0.006465256	0.166933135	Tmsb10	protein_coding	2.867868456	2.049711295	4.229861829	3.413964408
ENSMUSG00000027955.10	0.871234843	3.807483078	7.446053044	0.006357571	0.164993075	Fam198b	protein_coding	1.491159605	1.043826411	2.171019615	1.746446461
ENSMUSG00000050821.7	0.856105099	3.610174492	7.851313851	0.005078379	0.149384883	Fam131a	protein_coding	3.12923834	4.047549405	5.198194605	6.585867003
ENSMUSG00000018474.10	0.855017464	3.472877907	12.17138373	0.000485283	0.038239288	Chd3	protein_coding	1.47439798	0.889814127	1.369612466	2.22421553
ENSMUSG00000022425.9	0.838434339	1.704221744	7.269159901	0.007014861	0.174316995	Enpp2	protein_coding	0.982983848	0.66202225	1.03532833	1.454047969
ENSMUSG00000024299.10	0.836270093	2.873877577	6.707996658	0.009598149	0.207341842	Adamts10	protein_coding	1.4795817	0.870277973	1.722087512	1.767247256
ENSMUSG00000023915.4	0.834528268	1.666157338	7.975541449	0.004741357	0.144836857	Tnfrsf21	protein_coding	0.983721887	0.555177327	1.44655351	0.822105527
ENSMUSG00000031502.9	0.830066956	7.444263695	8.248894714	0.004077682	0.134811721	Col4a1	protein_coding	20.7767569	18.23155488	32.82895002	27.39185471
ENSMUSG00000064368.1	0.827400619	7.712584624	11.27318398	0.000786347	0.050440525	mt-Nd6	protein_coding	337.2774651	304.8797166	503.0119933	492.212607
ENSMUSG00000031613.8	0.826908993	1.178808926	7.611794001	0.005798776	0.157344786	Hpgd	protein_coding	1.648832916	0.650412185	1.831869043	1.4722596
ENSMUSG00000031673.5	0.825882339	2.22346756	9.249904397	0.002355077	0.094005286	Cdh11	protein_coding	1.198576205	0.633250087	1.382813674	1.293313181
ENSMUSG00000051067.7	0.817332102	2.891431083	8.111252378	0.004399132	0.139670156	Lingo3	protein_coding	1.556866758	1.678122713	2.457075991	2.584474171
ENSMUSG00000030022.8	0.816426448	3.873580274	13.50834759	0.000237505	0.023153652	Adamts9	protein_coding	1.325161157	0.706917289	1.465566303	1.483599121
ENSMUSG00000032220.8	0.816053911	2.818627873	8.006123266	0.004661944	0.143811028	Myo1e	protein_coding	1.355465999	0.941251189	1.848552558	1.56946306
ENSMUSG00000023046.6	0.812736972	2.665390437	7.975156197	0.004742366	0.144836857	Igfbp6	protein_coding	5.60484142	4.093410351	6.180290405	8.386711989
ENSMUSG00000017969.7	0.80157915	1.892766549	7.523273824	0.006090689	0.161090776	Ptgis	protein_coding	1.393221139	0.807534927	1.395829979	1.829658065
ENSMUSG00000050721.8	0.800020612	2.616742509	7.810373016	0.005194718	0.150671523	Plekho2	protein_coding	1.86213817	1.405762946	2.670122146	2.157818252
ENSMUSG00000000278.9	0.798220264	2.078285479	8.742356983	0.003109024	0.115604001	Scpep1	protein_coding	2.063025197	1.133783443	1.97428574	2.68120593
ENSMUSG00000024044.8	0.797062854	2.402635693	10.79316591	0.001018755	0.057810545	Epb4.1l3	protein_coding	0.881553627	0.481222001	0.826585598	1.144073312
ENSMUSG00000037405.7	0.790216302	3.570228076	6.963885282	0.008317123	0.193701087	Icam1	protein_coding	6.069251364	1.962115067	5.327326798	5.61074752
ENSMUSG00000056515.7	0.782017386	2.870038141	10.12051009	0.001466284	0.069473871	Rab31	protein_coding	1.700586236	1.063506577	1.754304631	2.250632107
ENSMUSG00000039713.10	0.780500986	2.920488557	7.17511323	0.007392178	0.180567548	Plekhg5	protein_coding	1.675384212	0.909884532	1.98629783	1.670987184
ENSMUSG00000054072.5	0.7736769	4.790268256	10.77000419	0.001031583	0.058104854	Iigp1	protein_coding	7.841503423	6.227855159	10.75032269	9.895270256
ENSMUSG00000049047.5	0.772231506	1.971924712	7.837470337	0.005117417	0.149732446	Armcx3	protein_coding	1.105656297	0.83742448	1.310412852	1.529116755
ENSMUSG00000002983.9	0.768558215	2.045224791	9.730549915	0.001812303	0.08035422	Relb	protein_coding	1.04172767	0.665482098	1.150290632	1.29240374
ENSMUSG00000070348.4	0.755125736	4.239978945	10.6747614	0.001086072	0.058917978	Ccnd1	protein_coding	4.297416909	3.744067943	6.212671943	5.534351153
ENSMUSG00000054404.6	0.752401236	4.771368675	6.8765654	0.008733323	0.197643417	Slfn5	protein_coding	6.338737475	3.847325264	7.298830815	7.009486976
ENSMUSG00000039735.8	0.750206151	2.57754686	6.886327948	0.008685752	0.197643417	Fnbp1l	protein_coding	1.175667621	0.730233241	1.38296874	1.291880114
ENSMUSG00000021003.8	0.74285276	2.066535095	7.871836654	0.005021063	0.148272475	Galc	protein_coding	0.904037936	0.614833384	1.138006885	1.003560131
ENSMUSG00000020674.9	0.738831212	4.730143447	13.87777486	0.000195092	0.021042255	Pxdn	protein_coding	2.744536907	2.142600308	3.591210059	3.390523047
ENSMUSG00000029826.8	0.733307585	3.434991741	11.64361207	0.000644234	0.044681174	Zc3hav1	protein_coding	1.648984999	0.947735457	1.844422621	1.736623613
ENSMUSG00000070327.6	0.728922891	5.663572148	10.62532119	0.001115496	0.059524428	Rnf213	protein_coding	3.045440346	1.681144141	3.451358946	3.004768586
ENSMUSG00000032812.9	0.728170956	3.733619385	10.70381799	0.001069147	0.058911533	Arap1	protein_coding	1.518613346	1.22414449	1.702378431	2.212661772
ENSMUSG00000013584.5	0.725952708	1.654452248	6.882424478	0.008704741	0.197643417	Aldh1a2	protein_coding	1.235277435	0.615596626	1.304335575	1.228199559
ENSMUSG00000028763.10	0.715325272	7.155961792	10.98575872	0.000918147	0.054941041	Hspg2	protein_coding	9.364673644	6.82966391	10.57667543	12.12360341
ENSMUSG00000034422.8	0.696588921	3.903374397	8.86204656	0.00291161	0.110423335	Parp14	protein_coding	1.612762562	1.06412891	1.944982131	1.703068327
ENSMUSG00000037936.9	0.694194168	3.051797332	6.897855112	0.008629923	0.197643417	Scarb1	protein_coding	1.342625997	0.796365918	1.370973765	1.519588439
ENSMUSG00000028032.9	0.689103364	2.174187164	8.204281158	0.004179166	0.136095848	Papss1	protein_coding	1.796198798	1.112802286	1.768366917	2.159889122
ENSMUSG00000059552.6	0.685076599	2.156719046	6.767626565	0.00928262	0.204594332	Trp53	protein_coding	1.129249838	0.726383572	1.318187229	1.180710433
ENSMUSG00000052632.8	0.671764153	2.925849767	7.068202947	0.007846392	0.187126639	Asap2	protein_coding	0.901743622	0.787151205	1.153373626	1.177920222
ENSMUSG00000038463.8	0.670316142	3.249056224	8.665726115	0.003242508	0.118824235	Olfml2b	protein_coding	2.264937899	1.284472466	1.947965866	2.754428255
ENSMUSG00000026748.7	0.665737998	2.59666604	7.961639365	0.004777912	0.145324969	Plxdc2	protein_coding	0.820572858	0.618934169	0.892254908	1.051235708
ENSMUSG00000020019.4	0.649367226	2.662059085	7.87939443	0.005000122	0.148037957	Ntn4	protein_coding	1.711494687	1.070328465	1.735582939	1.9295213
ENSMUSG00000037674.7	0.643064338	2.856717788	7.617185682	0.005781464	0.157344786	Rfx7	protein_coding	0.945458805	0.455837643	0.79786435	1.004619247
ENSMUSG00000039115.7	0.610238993	4.687939987	9.088716563	0.002571913	0.100034916	Itga9	protein_coding	3.214978269	2.116951139	3.335896611	3.524842809
ENSMUSG00000028024.7	0.608009731	2.212118692	6.720007669	0.009533722	0.207126914	Enpep	protein_coding	1.0192126	0.648980491	1.129521639	0.99778238
ENSMUSG00000031503.7	0.606811167	6.84655623	8.229374318	0.004121774	0.135386468	Col4a2	protein_coding	15.66993298	11.62644222	18.73186413	16.70193326
ENSMUSG00000017677.5	0.586963379	3.360359749	7.878213948	0.005003387	0.148037957	Wsb1	protein_coding	3.079360749	1.563826125	2.720219439	3.023776294
ENSMUSG00000035954.8	0.579490968	3.158786773	6.757961804	0.00933303	0.204714068	Dock4	protein_coding	1.252359426	0.803451159	1.351877803	1.223007231
ENSMUSG00000021065.8	0.567409261	3.308516949	8.180070492	0.004235311	0.137043864	Fut8	protein_coding	2.946651382	2.11636487	2.949673915	3.428161407
ENSMUSG00000035164.6	0.559786075	3.178706452	7.915229662	0.004902036	0.146463966	Zc3h12c	protein_coding	1.482897836	0.825800352	1.375447127	1.446780236
ENSMUSG00000032849.7	0.547360507	3.054028104	7.253052886	0.007078058	0.175600489	Abcc4	protein_coding	1.55480087	1.01046666	1.646140277	1.502922985
ENSMUSG00000027200.11	0.526557373	4.010358227	7.335473604	0.006760686	0.171646943	Sema6d	protein_coding	1.846935599	1.008073077	1.71256046	1.686446681
ENSMUSG00000032495.4	-0.448803052	7.511294864	6.876662292	0.00873285	0.197643417	Lrrc2	protein_coding	60.14168125	42.01851969	31.97426725	31.46639812
ENSMUSG00000038900.11	-0.450320097	6.475160889	6.890163837	0.008667132	0.197643417	Rpl12	protein_coding	41.66263852	24.94057739	20.16695319	20.44687714
ENSMUSG00000009927.8	-0.453956241	6.547446519	7.230457361	0.007167694	0.176645258	Rps25	protein_coding	188.4430075	114.4830268	94.46417849	89.98296633
ENSMUSG00000058600.7	-0.458510883	6.492006658	6.745083821	0.009400636	0.205316936	Rpl30	protein_coding	40.23323778	25.61986308	21.23110839	18.9067816
ENSMUSG00000043822.11	-0.463523894	5.376673173	6.982995836	0.008228775	0.192696422	Adamtsl5	protein_coding	11.21191303	6.192869764	5.174092507	5.254685942
ENSMUSG00000030652.4	-0.473624559	5.5868439	6.713721996	0.009567383	0.20726604	Coq7	protein_coding	14.70045242	10.81726547	7.66632357	8.00786099
ENSMUSG00000030747.4	-0.476601378	7.63146505	8.097355974	0.004432988	0.139869042	Dgat2	protein_coding	124.242396	70.31227097	56.63346323	59.19171764
ENSMUSG00000036835.6	-0.490841298	3.722846184	6.86927696	0.008769012	0.197862225	Psenen	protein_coding	26.63656882	17.16394501	12.86702979	13.29760119
ENSMUSG00000004035.6	-0.492484564	4.483331608	7.123304378	0.007608834	0.184534468	Gstm7	protein_coding	19.02859396	10.67252375	8.543130705	8.940609567
ENSMUSG00000057531.6	-0.503554361	5.676843905	7.53418411	0.006053915	0.160866814	Dtnbp1	protein_coding	50.85486827	31.43834633	24.81836076	23.67718048
ENSMUSG00000018858.9	-0.504903794	4.566723042	7.102538436	0.007697486	0.185369327	Ict1	protein_coding	9.003944834	6.340832396	4.659905757	4.498561526
ENSMUSG00000032348.5	-0.508852189	5.873158267	8.912564093	0.002832153	0.107894222	Gsta4	protein_coding	76.75278504	54.68899435	38.73634366	39.73356989
ENSMUSG00000058779.7	-0.509944186	5.528052282	8.76345354	0.003073266	0.114554465	Tomm20	protein_coding	41.44811106	25.20495234	19.52978574	19.53127997
ENSMUSG00000021124.6	-0.51173904	5.521605963	8.142850725	0.004323127	0.137832512	Vti1b	protein_coding	36.6632796	26.24492486	18.87665421	18.61787562
ENSMUSG00000031808.6	-0.514465358	6.50842273	7.658337278	0.005651056	0.155050898	Slc27a1	protein_coding	41.00726316	23.46720432	16.99840845	20.51803915
ENSMUSG00000031811.8	-0.515747294	4.774217509	7.038609305	0.007977095	0.18909448	Fbxo31	protein_coding	19.65044452	10.57837881	7.979888593	9.479380059
ENSMUSG00000012117.7	-0.518784252	4.258128531	7.8116947	0.00519092	0.150671523	Dhdds	protein_coding	6.466979319	3.662894914	2.767428538	3.105957235
ENSMUSG00000022174.8	-0.524508393	4.652952221	7.702038923	0.005515848	0.15363557	Dad1	protein_coding	8.079576247	5.503917457	3.970595059	4.004514925
ENSMUSG00000023806.8	-0.529996757	5.328400196	8.620605507	0.003323813	0.120714645	Rsph3b	protein_coding	25.19933639	15.51537446	11.66087937	11.9138977
ENSMUSG00000020572.7	-0.535053732	7.577530005	8.145650916	0.004316456	0.137832512	Nampt	protein_coding	57.09941269	41.82172455	27.5034968	30.78934334
ENSMUSG00000041798.9	-0.538663424	4.664077699	6.763544959	0.009303875	0.204714068	Gck	protein_coding	10.23181281	6.677331329	5.550674759	4.200411944
ENSMUSG00000090862.1	-0.543057934	6.823272119	7.613365482	0.005793725	0.157344786	Rps13	protein_coding	111.0698817	67.12468352	52.28051452	49.64610999
ENSMUSG00000037349.2	-0.545366319	3.596226219	7.566667672	0.005945761	0.159188857	Nudt22	protein_coding	15.35058463	10.14689658	6.953983872	7.798318969
ENSMUSG00000072528.3	-0.549906312	3.578201373	8.049153433	0.004552492	0.14189334	Rps19-ps4	protein_coding	34.72283367	22.62214772	16.72498944	16.16447571
ENSMUSG00000078566.2	-0.550055901	7.029936605	8.39101333	0.003770806	0.128719652	Bnip3	protein_coding	72.68712622	46.65905993	31.76522268	36.82017635
ENSMUSG00000028396.5	-0.558146489	5.401117048	8.41924042	0.003712709	0.127744058	2310002L09Rik	protein_coding	24.94826925	14.84590197	12.02954504	10.42784358
ENSMUSG00000023106.9	-0.560439709	4.047306687	7.765026241	0.005326752	0.151477778	Denr	protein_coding	7.077110306	5.517952948	3.714494401	3.599119587
ENSMUSG00000006715.4	-0.56625037	4.40388271	7.684175446	0.005570713	0.154597442	Gmnn	protein_coding	23.36720085	14.56734326	11.85449808	9.505923401
ENSMUSG00000071708.5	-0.571102275	5.246565332	9.661148301	0.001882059	0.081872933	Sms	protein_coding	9.454343284	5.23797076	4.225408799	3.933256054
ENSMUSG00000000326.6	-0.571468308	6.82071775	10.72809712	0.001055209	0.058459298	Comt	protein_coding	53.7815793	39.64628706	26.51591919	27.12034605
ENSMUSG00000058351.5	-0.572221253	3.475608885	7.759399339	0.005343373	0.151477778	2010107H07Rik	protein_coding	21.71386116	14.78023111	11.05866747	9.60606854
ENSMUSG00000063953.2	-0.574642042	3.940997733	6.82429015	0.008992629	0.200591662	Amd2	protein_coding	6.717725798	4.048339942	3.003088801	3.027267285
ENSMUSG00000019945.3	-0.577404382	3.446991683	6.694935904	0.009668714	0.208315617	1700040L02Rik	protein_coding	10.77035219	7.363596002	5.368958003	4.89174597
ENSMUSG00000029681.6	-0.577904612	4.177651786	9.309740982	0.002279387	0.091464164	Bcl7b	protein_coding	9.892172045	6.310964451	4.849366601	4.244111997
ENSMUSG00000026473.9	-0.579759538	8.583154628	7.344097433	0.00672833	0.171111119	Glul	protein_coding	146.8613303	73.84966522	56.26121804	64.59628047
ENSMUSG00000036752.4	-0.579807036	7.574188677	6.783611398	0.009199857	0.203064475	Tubb2c	protein_coding	129.4083639	55.21612561	52.59017008	46.38883227
ENSMUSG00000031534.8	-0.580427867	4.206152002	8.587163688	0.003385409	0.122003078	AI316807	protein_coding	16.31902023	10.84104013	8.23757539	7.022370288
ENSMUSG00000052684.3	-0.59295721	8.161946214	6.826447822	0.008981772	0.200591662	Jun	protein_coding	150.0762914	65.31541991	52.97750174	62.10682757
ENSMUSG00000027999.8	-0.594751013	4.874737388	7.590464295	0.005867784	0.158222078	Pla2g12a	protein_coding	25.19590377	12.05421056	9.84991094	10.23195653
ENSMUSG00000044442.5	-0.595870787	3.06387811	6.896498612	0.008636473	0.197643417	N6amt1	protein_coding	1.51607383	1.205083117	0.78384047	0.752996879
ENSMUSG00000015365.8	-0.603566174	5.186234516	8.836178802	0.002953168	0.111663858	Mov10l1	protein_coding	12.01832144	6.912881374	5.468624208	4.843729172
ENSMUSG00000024871.4	-0.606897743	5.426593163	7.79319718	0.005244331	0.150689888	Doc2g	protein_coding	19.19099944	10.24855648	8.8573521	6.986250315
ENSMUSG00000042109.7	-0.607670209	4.860064681	7.469305582	0.006275975	0.163153905	Csdc2	protein_coding	9.30997079	5.510540962	3.800559993	4.307223764
ENSMUSG00000031770.9	-0.609052947	6.89742866	9.659539519	0.001883708	0.081872933	Herpud1	protein_coding	77.17160473	37.11958332	28.58632195	32.45918212
ENSMUSG00000074466.6	-0.630798243	3.299377053	7.732706293	0.005422941	0.151957138	Gm15417	processed_transcript	7.929145699	5.986326488	3.646195102	4.030770754
ENSMUSG00000034620.10	-0.641344802	3.646774493	10.50914351	0.001187853	0.061445131	Tmem5	protein_coding	2.726334628	1.893890101	1.277734075	1.224018399
ENSMUSG00000057880.6	-0.652708003	4.298334638	8.78367048	0.00303939	0.113570133	Abat	protein_coding	3.129267961	2.013185069	1.574463363	1.158917671
ENSMUSG00000025169.6	-0.654269637	2.518892013	7.570815831	0.005932093	0.159109817	1110031I02Rik	protein_coding	5.583086704	3.993307822	2.347839474	2.805318385
ENSMUSG00000020955.7	-0.66062545	4.806883638	10.23487944	0.001378096	0.06632306	Ap4s1	protein_coding	37.99925704	23.81904089	16.14045098	16.603408
ENSMUSG00000025701.6	-0.664504843	2.587349347	7.997634741	0.004683849	0.144194295	Alox5	protein_coding	2.429152031	1.618641089	1.004985707	1.149724862
ENSMUSG00000021234.3	-0.666157113	2.658791132	8.421812023	0.003707461	0.127744058	Fam161b	protein_coding	1.905216205	1.004578934	0.711568269	0.803271247
ENSMUSG00000044991.4	-0.692612923	4.024611262	7.757587641	0.005348735	0.151477778	1110034G24Rik	protein_coding	10.71806885	5.030337183	3.434661906	4.517014427
ENSMUSG00000031616.7	-0.718128722	4.041926446	7.937925631	0.00484093	0.146363533	Ednra	protein_coding	4.312592031	1.753294103	1.478595908	1.477281277
ENSMUSG00000047843.10	-0.722526478	4.629615637	10.65728403	0.001096383	0.058917978	Bri3	protein_coding	18.61943759	11.42913776	8.37580253	6.787392659
ENSMUSG00000031461.4	-0.736331899	9.751696817	7.109249896	0.007668719	0.185120448	Myom2	protein_coding	155.8628001	59.54384567	56.7247681	45.52206823
ENSMUSG00000075270.5	-0.740192762	2.013610687	8.130834773	0.004351871	0.138458678	Pde11a	protein_coding	1.122120091	0.806485904	0.45493885	0.527011461
ENSMUSG00000078572.2	-0.750784193	3.840255045	9.856240313	0.001692566	0.076979639	1810043H04Rik	protein_coding	22.07715614	19.04952084	10.29426782	10.90418591
ENSMUSG00000037216.4	-0.763472748	2.081144242	8.458352584	0.003633708	0.127330498	Lipt1	protein_coding	1.666129085	1.34692117	0.861547846	0.653575307
ENSMUSG00000071476.2	-0.767124024	2.791196378	9.461738566	0.002098021	0.086867806	Rps19-ps1	protein_coding	19.47089089	14.98203811	8.536779377	8.74319092
ENSMUSG00000024866.9	-0.773188742	3.77516907	12.17607007	0.000484065	0.038239288	Acy3	protein_coding	11.84919175	7.700091216	5.412764865	4.153003443
ENSMUSG00000025193.8	-0.773752754	2.927796326	11.56643514	0.00067153	0.045765925	Cutc	protein_coding	8.23682207	4.651379525	3.46161246	2.75091943
ENSMUSG00000045193.7	-0.788294241	4.547112729	11.80329062	0.000591261	0.043650004	Cirbp	protein_coding	12.70892144	5.678536905	3.777931814	4.852730912
ENSMUSG00000023267.4	-0.793168624	0.675470951	6.645765897	0.009939174	0.210753461	Gabrr2	protein_coding	1.409587169	0.751886936	0.535614426	0.492838869
ENSMUSG00000056359.4	-0.798464114	1.294094105	7.385107822	0.006576613	0.169223716	D830013O20Rik	protein_coding	5.500418439	3.159845801	1.991589232	2.146750269
ENSMUSG00000019944.7	-0.800026623	6.026887232	8.44110818	0.003668326	0.127684949	Rhobtb1	protein_coding	14.90363729	5.469393049	4.079769067	5.203291389
ENSMUSG00000028329.7	-0.8150403	1.656574681	8.218582496	0.004146358	0.135867134	Xpa	protein_coding	2.119549313	1.325516217	0.839504485	0.805505876
ENSMUSG00000002108.4	-0.821849499	3.350508619	11.35822158	0.000751147	0.049027665	Nr1h3	protein_coding	6.238619329	3.067001169	2.020706726	2.290291706
ENSMUSG00000046567.9	-0.825062527	1.043327671	7.435701847	0.006394242	0.165380332	4930430F08Rik	protein_coding	1.13430618	0.855745968	0.393648248	0.56655917
ENSMUSG00000031617.9	-0.837924489	3.007722128	10.52509516	0.001177643	0.061445131	Tmem184c	protein_coding	4.145882817	1.781881346	1.304448698	1.376782638
ENSMUSG00000037868.8	-0.839036096	1.215458277	8.706730512	0.003170373	0.116743423	Egr2	protein_coding	1.08793292	0.728393573	0.440951851	0.411703003
ENSMUSG00000022037.8	-0.842409759	8.937730475	6.644288871	0.009947418	0.210753461	Clu	protein_coding	178.847638	83.74453479	61.53567432	57.02788693
ENSMUSG00000028825.7	-0.86985666	3.024280561	11.34689185	0.000755743	0.049116864	Rhd	protein_coding	7.841116532	4.166387591	2.542989367	2.894888446
ENSMUSG00000076612.2	-0.875353211	3.669999106	13.13509041	0.000289816	0.027375939	Ighg2c	protein_coding	13.64768388	9.50328417	5.27250077	5.413787625
ENSMUSG00000031765.6	-0.87572982	6.97511503	14.0663508	0.000176473	0.020178943	Mt1	protein_coding	274.2133945	113.5167507	79.57346056	89.76832059
ENSMUSG00000028307.9	-0.883272922	4.231834758	10.84252137	0.000991956	0.056927028	Aldob	protein_coding	15.77035257	7.901327264	4.855746232	5.660454136
ENSMUSG00000028841.8	-0.903288928	3.037289726	8.420997522	0.003709122	0.127744058	Cnksr1	protein_coding	3.509783593	1.541332829	1.095489755	1.079881315
ENSMUSG00000034842.9	-0.911335568	7.140384168	12.23478237	0.000469068	0.037944619	Art3	protein_coding	58.5875018	27.03383908	19.59530459	17.17675457
ENSMUSG00000054426.5	-0.936151643	0.797994928	7.227816482	0.007178246	0.176645258	A930005H10Rik	protein_coding	7.190954022	4.408875757	3.082725886	1.873324217
ENSMUSG00000020990.4	-0.959467999	2.824099734	16.05473512	6.15375E-05	0.009648072	Cdkl1	protein_coding	5.2247766	3.138048175	1.850737161	1.736323327
ENSMUSG00000031762.6	-0.97268365	4.618950807	7.785035708	0.005268075	0.150689888	Mt2	protein_coding	83.87126121	24.50665218	16.96149602	26.02934701
ENSMUSG00000074623.4	-0.993317369	1.813554729	13.15087233	0.000287385	0.027315984	Gm826	protein_coding	3.239567996	1.989445926	0.966804713	1.244907166
ENSMUSG00000037095.7	-1.007421238	4.152405539	9.589742406	0.001956674	0.083353214	Lrg1	protein_coding	19.34771024	7.891920288	5.52407416	5.290125505
ENSMUSG00000039488.8	-1.089260255	2.719661686	23.4439636	1.28606E-06	0.000527154	Cntn5	protein_coding	2.081754998	1.530915083	0.689611117	0.754808702
ENSMUSG00000034334.7	-1.091792498	0.087329679	7.88016243	0.004997999	0.148037957	Fam151b	protein_coding	1.010681538	0.829574063	0.313877545	0.419624625
ENSMUSG00000035984.8	-1.115700305	0.365769217	7.924354034	0.004877376	0.146378333	Nme5	protein_coding	1.322863604	1.229113214	0.525860987	0.475732191
ENSMUSG00000044405.4	-1.135714597	0.045916837	7.228945189	0.007173735	0.176645258	Adig	protein_coding	1.454774817	1.853259437	0.535461072	0.791214642
ENSMUSG00000074183.3	-1.158005441	2.024485755	12.79036414	0.000348409	0.030277763	Gsta1	protein_coding	4.393109951	5.036803731	1.788782285	1.951972458
ENSMUSG00000055866.7	-1.176934498	2.990088959	10.39990429	0.001260218	0.063134126	Per2	protein_coding	1.948201363	0.546161041	0.425301016	0.428006336
ENSMUSG00000089889.1	-1.179492267	0.595818514	10.89816826	0.000962594	0.056187169	0610040B10Rik	processed_transcript	3.320943472	1.837204463	1.100110022	0.803847481
ENSMUSG00000091626.1	-1.26187265	0.609863087	7.95229924	0.004802632	0.14552333	Gm17462	protein_coding	1.094425174	0.509680222	0.215983655	0.341940484
ENSMUSG00000002769.8	-1.288969627	1.23666775	7.11885539	0.007627739	0.184534468	Gnmt	protein_coding	3.832921371	0.994988914	1.054098888	0.455134294
ENSMUSG00000024222.9	-1.29497238	2.936293869	8.791955119	0.003025618	0.113333992	Fkbp5	protein_coding	2.564710701	0.73296947	0.470475814	0.573700748
ENSMUSG00000053166.7	-1.344428544	1.846537701	9.024380998	0.002664021	0.102309179	Cdh22	protein_coding	1.706509414	0.493124987	0.319690092	0.35387685
ENSMUSG00000074240.3	-1.445946301	-0.109707284	10.4407506	0.001232652	0.0629066	Cib3	protein_coding	2.032498705	1.69476909	0.628407981	0.521128372
ENSMUSG00000071078.5	-1.52448405	-0.017135288	10.73091765	0.001053602	0.058459298	Nr2c2ap	protein_coding	0.927942785	1.160627122	0.122957728	0.545058976
ENSMUSG00000053093.9	-1.543903869	10.10841242	15.67996053	7.50148E-05	0.011408245	Myh7	protein_coding	240.0006555	53.53893622	36.84701325	39.19931962
ENSMUSG00000074264.5	-1.557353765	4.390893295	27.95784566	1.23987E-07	7.53825E-05	Amy1	protein_coding	9.869936893	6.591834498	2.733014947	1.95548756
ENSMUSG00000074181.1	-1.559678276	1.628764091	22.62196713	1.97217E-06	0.000749818	Gm3776	protein_coding	4.169874978	4.515845202	1.381330725	1.209013386
ENSMUSG00000052188.6	-1.593002757	0.693433807	13.90526129	0.00019226	0.020884879	Gm14964	processed_transcript	2.179991345	1.363315241	0.456096829	0.52150387
ENSMUSG00000079045.2	-1.599070276	-0.878795259	8.615786943	0.003332618	0.120714645	Gm17566	lincRNA	1.0489788	0.590405971	0.382238153	0.073351622
ENSMUSG00000078493.2	-1.650275936	0.459128649	10.843851	0.000991244	0.056927028	A930039A15Rik	protein_coding	7.12708791	1.247991615	0.88142126	1.196096909
ENSMUSG00000087404.1	-1.859302718	-0.256929226	16.74650186	4.2721E-05	0.00746782	Gm11752	processed_transcript	2.992067483	1.817706572	0.33982805	0.777122893
ENSMUSG00000092596.1	-1.93079807	-0.909591019	10.66735705	0.001090428	0.058917978	RP23-368M21.6	processed_transcript	4.209830226	2.355599333	0.440389412	0.929619536
ENSMUSG00000020469.8	-1.984777424	2.99274003	9.98450952	0.001578626	0.073643387	Myl7	protein_coding	71.73395644	8.24542953	4.096200663	10.67813407
ENSMUSG00000044522.4	-2.00437625	-0.780405478	11.26604579	0.000789377	0.050440525	A730020M07Rik	protein_coding	1.031857039	0.364734267	0.237786019	0.062742916
ENSMUSG00000089718.1	-2.026364242	-1.830198616	6.946568199	0.008398018	0.194394313	2310075C17Rik	processed_transcript	1.07228944	1.005876839	0.26640841	0.187454145
ENSMUSG00000044835.9	-2.032136126	0.924224981	21.75354398	3.10017E-06	0.001025302	Ankrd45	protein_coding	1.003464701	0.650785529	0.147738682	0.181919556
ENSMUSG00000056494.7	-2.102653479	1.266539662	25.41840175	4.61495E-07	0.0002264	Cngb3	protein_coding	1.444504197	0.359027256	0.184043336	0.135974201
ENSMUSG00000041616.9	-2.136617378	6.847310296	9.770228418	0.001773604	0.079099625	Nppa	protein_coding	233.1595115	25.17375993	17.62375077	24.87181611
ENSMUSG00000053719.8	-2.152144614	1.289427191	13.00611896	0.000310475	0.02834145	Klk1b26	protein_coding	7.704918478	2.158926903	0.497213853	1.224498851
ENSMUSG00000063415.5	-2.204388277	1.919939023	31.90813661	1.61639E-08	1.75586E-05	Cyp26b1	protein_coding	1.880765341	0.691526645	0.181586755	0.26435318
ENSMUSG00000015090.7	-2.221665531	8.579801241	32.75227788	1.04684E-08	1.22464E-05	Ptgds	protein_coding	619.8897418	189.7468427	81.74292636	52.13531309
ENSMUSG00000030483.8	-2.268401438	1.905285184	29.19611304	6.54103E-08	4.9738E-05	Cyp2b10	protein_coding	1.942057992	1.821775988	0.438014969	0.231151829
ENSMUSG00000054745.1	-2.352398748	-1.763385775	7.283330723	0.006959737	0.173514236	Gm9955	protein_coding	1.127992788	0.705420121	0.186831872	0.197192023
ENSMUSG00000042045.5	-2.531777083	0.91660905	9.879057968	0.001671705	0.076516902	Sln	protein_coding	21.67153395	1.42940393	0.616945791	2.249449742
ENSMUSG00000068745.5	-2.650219499	0.295689005	14.50834311	0.00013954	0.017569451	Mybphl	protein_coding	5.042555436	0.407594643	0.249994622	0.383792373
ENSMUSG00000056071.6	-2.71741832	0.202488364	18.76018356	1.4823E-05	0.003757129	S100a9	protein_coding	8.283900791	1.726852146	0.997876587	0.117023397
ENSMUSG00000026822.9	-2.987753367	2.689868278	20.06236164	7.49574E-06	0.002072641	Lcn2	protein_coding	4.439110373	0.86236766	0.287846233	0.21134456
ENSMUSG00000023078.4	-3.10056371	-1.364130661	20.56294648	5.77022E-06	0.001687568	Cxcl13	protein_coding	1.002178208	0.278550509	0.049183091	0.077865568
ENSMUSG00000056054.8	-5.879738032	-0.31729324	39.81946847	2.78555E-10	8.47252E-07	S100a8	protein_coding	9.266069289	1.466149532	0.147928577	0
