# Supplementary material for: 8-Oxoguanine DNA Glycosylase (OGG1) Deficiency Exacerbates Doxorubicin-Induced Cardiac Dysfunction
Source: Oxid Med Cell Longev. 2022 Mar 27;2022:9180267. doi: 10.1155/2022/9180267 (PMC8981022; doi:10.1155/2022/9180267)
Supplement: Supplementary 4 — Supplementary Table 4: gene ontology terms in upregulated genes in the KO saline compared to WT Saline. [file 9180267.f4.txt]

Analysis Type:	PANTHER Overrepresentation Test (Released 20210224)					
Annotation Version and Release Date:	GO Ontology database DOI:  10.5281/zenodo.5080993 Released 2021-07-02					
Analyzed List:	upload_1 (Mus musculus)					
Reference List:	Mus musculus (all genes in database)					
Test Type:	FISHER					
Correction:	BONFERRONI					
Bonferroni count:	9132					
GO biological process complete	Mus musculus - REFLIST (21988)	upload_1 (111)	upload_1 (expected)	upload_1 (over/under)	upload_1 (fold Enrichment)	upload_1 (P-value)
adhesion of symbiont to host (GO:0044406)	14	5	0.07	+	70.75	2.93E-04
peptide antigen assembly with MHC class II protein complex (GO:0002503)	15	4	0.08	+	52.82	2.01E-02
MHC class II protein complex assembly (GO:0002399)	15	4	0.08	+	52.82	2.01E-02
peptide antigen assembly with MHC protein complex (GO:0002501)	17	4	0.09	+	46.61	3.08E-02
antigen processing and presentation of peptide antigen via MHC class Ib (GO:0002428)	36	8	0.18	+	44.02	4.37E-07
MHC protein complex assembly (GO:0002396)	18	4	0.09	+	44.02	3.76E-02
antigen processing and presentation of endogenous peptide antigen (GO:0002483)	41	9	0.21	+	43.48	2.82E-08
antigen processing and presentation of endogenous peptide antigen via MHC class I (GO:0019885)	41	9	0.21	+	43.48	2.82E-08
antigen processing and presentation of exogenous peptide antigen (GO:0002478)	32	7	0.16	+	43.33	8.19E-06
antigen processing and presentation of exogenous peptide antigen via MHC class II (GO:0019886)	24	5	0.12	+	41.27	2.88E-03
"antigen processing and presentation of endogenous peptide antigen via MHC class I via ER pathway, TAP-independent (GO:0002486)"	34	7	0.17	+	40.78	1.19E-05
antigen processing and presentation of endogenous antigen (GO:0019883)	44	9	0.22	+	40.52	4.92E-08
antigen processing and presentation of endogenous peptide antigen via MHC class I via ER pathway (GO:0002484)	35	7	0.18	+	39.62	1.42E-05
antigen processing and presentation of endogenous peptide antigen via MHC class Ib (GO:0002476)	35	7	0.18	+	39.62	1.42E-05
antigen processing and presentation via MHC class Ib (GO:0002475)	40	8	0.2	+	39.62	9.15E-07
antigen processing and presentation of peptide antigen via MHC class II (GO:0002495)	26	5	0.13	+	38.09	4.08E-03
antigen processing and presentation of peptide or polysaccharide antigen via MHC class II (GO:0002504)	27	5	0.14	+	36.68	4.82E-03
antigen processing and presentation of peptide antigen via MHC class I (GO:0002474)	50	9	0.25	+	35.66	1.36E-07
antigen processing and presentation of exogenous antigen (GO:0019884)	39	7	0.2	+	35.55	2.77E-05
antigen processing and presentation of peptide antigen (GO:0048002)	75	13	0.38	+	34.34	5.03E-12
defense response to protozoan (GO:0042832)	37	6	0.19	+	32.12	6.71E-04
positive regulation of T cell mediated cytotoxicity (GO:0001916)	52	8	0.26	+	30.48	5.90E-06
response to protozoan (GO:0001562)	41	6	0.21	+	28.99	1.16E-03
antigen processing and presentation (GO:0019882)	112	16	0.57	+	28.3	2.87E-14
regulation of T cell mediated cytotoxicity (GO:0001914)	59	8	0.3	+	26.86	1.46E-05
cellular response to interferon-beta (GO:0035458)	55	7	0.28	+	25.21	2.38E-04
response to interferon-beta (GO:0035456)	66	8	0.33	+	24.01	3.28E-05
positive regulation of T cell mediated immunity (GO:0002711)	82	9	0.41	+	21.74	7.43E-06
response to interferon-gamma (GO:0034341)	126	13	0.64	+	20.44	2.21E-09
positive regulation of leukocyte mediated cytotoxicity (GO:0001912)	89	8	0.45	+	17.81	2.86E-04
regulation of T cell mediated immunity (GO:0002709)	111	9	0.56	+	16.06	8.79E-05
positive regulation of cell killing (GO:0031343)	100	8	0.5	+	15.85	6.65E-04
regulation of leukocyte mediated cytotoxicity (GO:0001910)	120	9	0.61	+	14.86	1.66E-04
cellular response to interferon-gamma (GO:0071346)	98	7	0.49	+	14.15	9.24E-03
positive regulation of adaptive immune response (GO:0002821)	155	11	0.78	+	14.06	6.96E-06
positive regulation of adaptive immune response based on somatic recombination of immune receptors built from immunoglobulin superfamily domains (GO:0002824)	148	10	0.75	+	13.38	6.64E-05
regulation of cell killing (GO:0031341)	140	9	0.71	+	12.73	5.81E-04
positive regulation of lymphocyte mediated immunity (GO:0002708)	155	9	0.78	+	11.5	1.32E-03
positive regulation of leukocyte mediated immunity (GO:0002705)	180	10	0.91	+	11.01	3.86E-04
regulation of adaptive immune response (GO:0002819)	228	11	1.15	+	9.56	3.14E-04
regulation of adaptive immune response based on somatic recombination of immune receptors built from immunoglobulin superfamily domains (GO:0002822)	212	10	1.07	+	9.34	1.66E-03
angiogenesis (GO:0001525)	325	15	1.64	+	9.14	1.54E-06
regulation of lymphocyte mediated immunity (GO:0002706)	219	10	1.11	+	9.05	2.21E-03
regulation of leukocyte mediated immunity (GO:0002703)	291	12	1.47	+	8.17	3.82E-04
blood vessel morphogenesis (GO:0048514)	440	18	2.22	+	8.1	1.32E-07
positive regulation of immune effector process (GO:0002699)	292	11	1.47	+	7.46	3.44E-03
extracellular matrix organization (GO:0030198)	270	10	1.36	+	7.34	1.39E-02
extracellular structure organization (GO:0043062)	271	10	1.37	+	7.31	1.43E-02
external encapsulating structure organization (GO:0045229)	272	10	1.37	+	7.28	1.48E-02
blood vessel development (GO:0001568)	543	19	2.74	+	6.93	4.52E-07
vasculature development (GO:0001944)	574	19	2.9	+	6.56	1.12E-06
regulation of immune effector process (GO:0002697)	416	13	2.1	+	6.19	2.27E-03
response to cytokine (GO:0034097)	786	21	3.97	+	5.29	4.79E-06
tube morphogenesis (GO:0035239)	740	19	3.74	+	5.09	6.66E-05
innate immune response (GO:0045087)	866	22	4.37	+	5.03	4.39E-06
cellular response to cytokine stimulus (GO:0071345)	683	15	3.45	+	4.35	2.00E-02
defense response to other organism (GO:0098542)	1101	24	5.56	+	4.32	1.26E-05
circulatory system development (GO:0072359)	933	20	4.71	+	4.25	4.81E-04
tube development (GO:0035295)	963	19	4.86	+	3.91	3.77E-03
immune response (GO:0006955)	1744	34	8.8	+	3.86	3.71E-08
defense response (GO:0006952)	1472	27	7.43	+	3.63	3.83E-05
regulation of immune response (GO:0050776)	1062	19	5.36	+	3.54	1.59E-02
response to other organism (GO:0051707)	1479	26	7.47	+	3.48	1.86E-04
response to external biotic stimulus (GO:0043207)	1481	26	7.48	+	3.48	1.92E-04
positive regulation of immune system process (GO:0002684)	1084	19	5.47	+	3.47	2.13E-02
response to biotic stimulus (GO:0009607)	1517	26	7.66	+	3.4	3.09E-04
biological process involved in interspecies interaction between organisms (GO:0044419)	1598	27	8.07	+	3.35	2.11E-04
regulation of immune system process (GO:0002682)	1636	26	8.26	+	3.15	1.35E-03
immune system process (GO:0002376)	2574	38	12.99	+	2.92	4.73E-06
cellular response to organic substance (GO:0071310)	1848	26	9.33	+	2.79	1.35E-02
response to external stimulus (GO:0009605)	2425	34	12.24	+	2.78	1.99E-04
cellular response to chemical stimulus (GO:0070887)	2441	32	12.32	+	2.6	2.77E-03
response to organic substance (GO:0010033)	2581	33	13.03	+	2.53	2.99E-03
response to chemical (GO:0042221)	3549	42	17.92	+	2.34	3.30E-04
response to stimulus (GO:0050896)	8591	68	43.37	+	1.57	2.96E-02
Unclassified (UNCLASSIFIED)	1305	3	6.59	-	0.46	0.00E+00
