# Supplementary material for: 8-Oxoguanine DNA Glycosylase (OGG1) Deficiency Exacerbates Doxorubicin-Induced Cardiac Dysfunction
Source: Oxid Med Cell Longev. 2022 Mar 27;2022:9180267. doi: 10.1155/2022/9180267 (PMC8981022; doi:10.1155/2022/9180267)
Supplement: Supplementary 5 — Supplementary Table 5: gene ontology terms in downregulated genes in the KO saline compared to WT Saline. [file 9180267.f5.txt]

Analysis Type:	PANTHER Overrepresentation Test (Released 20210224)					
Annotation Version and Release Date:	GO Ontology database DOI:  10.5281/zenodo.5080993 Released 2021-07-02					
Analyzed List:	upload_1 (Mus musculus)					
Reference List:	Mus musculus (all genes in database)					
Test Type:	FISHER					
Correction:	BONFERRONI					
Bonferroni count:	9132					
GO biological process complete	Mus musculus - REFLIST (21988)	upload_1 (102)	upload_1 (expected)	upload_1 (over/under)	upload_1 (fold Enrichment)	upload_1 (P-value)
xenobiotic metabolic process (GO:0006805)	110	7	0.51	+	13.72	0.0109
cellular response to xenobiotic stimulus (GO:0071466)	114	7	0.53	+	13.24	0.0136
response to xenobiotic stimulus (GO:0009410)	122	7	0.57	+	12.37	0.0209
monocarboxylic acid metabolic process (GO:0032787)	520	13	2.41	+	5.39	0.00978
organic acid metabolic process (GO:0006082)	845	16	3.92	+	4.08	0.0186
carboxylic acid metabolic process (GO:0019752)	795	15	3.69	+	4.07	0.0418
small molecule metabolic process (GO:0044281)	1469	22	6.81	+	3.23	0.00878
cellular biosynthetic process (GO:0044249)	2018	26	9.36	+	2.78	0.0124
organic substance biosynthetic process (GO:1901576)	2092	26	9.7	+	2.68	0.0241
biosynthetic process (GO:0009058)	2159	26	10.02	+	2.6	0.0427
organonitrogen compound metabolic process (GO:1901564)	4378	41	20.31	+	2.02	0.0239
Unclassified (UNCLASSIFIED)	1305	5	6.05	-	0.83	0
