# Supplementary material for: 8-Oxoguanine DNA Glycosylase (OGG1) Deficiency Exacerbates Doxorubicin-Induced Cardiac Dysfunction
Source: Oxid Med Cell Longev. 2022 Mar 27;2022:9180267. doi: 10.1155/2022/9180267 (PMC8981022; doi:10.1155/2022/9180267)
Supplement: Supplementary 6 — Supplementary Table 6: differentially expressed genes between KO doxorubicin-treated and KO saline-treated CMs. [file 9180267.f6.txt]

	logFC	logCPM	LR	PValue	FDR	hgnc	biotype	KO_Saline2	KO_Saline1	KO_DXB2	KO_DXB1
ENSMUSG00000050359.6	4.017403335	0.348035568	19.55466764	9.77616E-06	0.001749127	Sprr1a	protein_coding	0.071930271	0.075918929	1.258555386	1.526529848
ENSMUSG00000056054.8	3.671682525	-0.31729324	11.25453429	0.000794287	0.035632814	S100a8	protein_coding	0.147928577	0	0.675205751	1.721602615
ENSMUSG00000090137.1	2.971034668	0.229966741	18.02745818	2.17742E-05	0.002930455	Uba52	protein_coding	0.057775318	0.26424259	1.084140604	2.320415021
ENSMUSG00000036264.8	2.946145411	2.114114615	79.47103093	4.89348E-19	3.721E-15	Fstl4	protein_coding	0.178012586	0.125255795	1.464544585	1.841530936
ENSMUSG00000026822.9	2.763313303	2.689868278	17.27456919	3.23487E-05	0.003755417	Lcn2	protein_coding	0.287846233	0.21134456	1.904125251	2.844478859
ENSMUSG00000046229.8	2.602536342	3.155314788	35.33461861	2.77653E-09	1.72158E-06	Scand1	protein_coding	2.546540626	2.888329127	18.67846257	27.1128666
ENSMUSG00000030483.8	2.561387684	1.905285184	37.41859697	9.5309E-10	7.62873E-07	Cyp2b10	protein_coding	0.438014969	0.231151829	2.082580376	3.485891184
ENSMUSG00000052188.6	2.397052396	0.693433807	35.29742733	2.83006E-09	1.72158E-06	Gm14964	processed_transcript	0.456096829	0.52150387	2.891402874	4.319324238
ENSMUSG00000087580.2	2.395957581	4.153790975	34.34300304	4.62059E-09	2.60259E-06	Gm16869	lincRNA	2.678967251	0.99528726	14.24956564	13.36619154
ENSMUSG00000091604.1	2.382953961	-2.112400746	7.380857136	0.006592174	0.118223809	Gm17349	protein_coding	0.294594965	0	1.195244765	1.344515995
ENSMUSG00000004939.6	2.157149687	2.648517534	33.24855325	8.11001E-09	4.40489E-06	Itgb1bp3	protein_coding	0.910410409	1.01059567	7.618381235	4.51326073
ENSMUSG00000067833.2	2.047547403	2.16183533	30.43617199	3.45034E-08	1.74909E-05	2900097C17Rik	protein_coding	4.000855292	4.312554535	19.03860476	28.78815594
ENSMUSG00000053093.9	2.03134784	10.10841242	26.33044106	2.87718E-07	0.000105244	Myh7	protein_coding	36.84701325	39.19931962	257.3443743	182.5282387
ENSMUSG00000021091.8	2.012485284	4.149113587	8.354058007	0.003848269	0.085998475	Serpina3n	protein_coding	0.824455749	1.460121214	4.42223148	8.265345147
ENSMUSG00000050335.9	1.945286318	1.481090683	27.76397982	1.37054E-07	5.6333E-05	Lgals3	protein_coding	0.513232202	0.476032202	2.224285899	3.130251266
ENSMUSG00000041616.9	1.922880692	6.847310296	8.026404942	0.004610025	0.095908705	Nppa	protein_coding	17.62375077	24.87181611	117.3619085	108.3115258
ENSMUSG00000039481.5	1.878627349	2.321775572	19.55935644	9.75219E-06	0.001749127	Nrtn	protein_coding	1.551437211	1.845871994	7.338890741	10.04168907
ENSMUSG00000044407.6	1.867869458	-1.818437753	6.829304539	0.008967417	0.141469383	Qk	protein_coding	0.303930721	0.320784206	1.69554308	1.803261065
ENSMUSG00000028755.3	1.854577489	-0.51038842	9.642815856	0.001900936	0.059886465	Cda	protein_coding	0.251162924	0.058908965	0.551974698	1.031664989
ENSMUSG00000063415.5	1.813852274	1.919939023	21.30546208	3.91614E-06	0.00085081	Cyp26b1	protein_coding	0.181586755	0.26435318	1.30517737	0.900196618
ENSMUSG00000085772.1	1.781726761	-0.007755961	11.47406961	0.00070574	0.032722223	D630024D03Rik	processed_transcript	0.221608023	0.21440519	0.618144075	1.517111116
ENSMUSG00000055866.7	1.736958497	2.990088959	22.43676284	2.17177E-06	0.000551237	Per2	protein_coding	0.425301016	0.428006336	1.96381817	2.031333035
ENSMUSG00000078201.3	1.722170539	0.521758097	22.20971835	2.44433E-06	0.000580835	Tmem203	protein_coding	0.630276194	0.465658271	2.876835017	2.2868553
ENSMUSG00000062309.7	1.721612445	0.11078296	16.99336291	3.75107E-05	0.004320347	Rpp25	protein_coding	0.256702825	0.316093681	1.13914824	1.552341181
ENSMUSG00000075227.4	1.718920983	0.060037613	14.35910819	0.000151047	0.01148563	Znhit2-ps	protein_coding	0.134869258	0.332145313	0.991796364	1.200295646
ENSMUSG00000026204.8	1.705054863	2.810166188	34.79311561	3.66668E-09	2.14472E-06	Ptprn	protein_coding	0.843828916	0.67445062	3.352989985	3.645544864
ENSMUSG00000092596.1	1.686313141	-0.909591019	7.466313344	0.006286415	0.114358617	RP23-368M21.6	processed_transcript	0.440389412	0.929619536	2.456807319	4.220819856
ENSMUSG00000043621.7	1.685623335	1.876955506	30.08798958	4.1288E-08	2.02551E-05	Ubxn10	protein_coding	0.290627356	0.28006983	1.489955012	1.089961386
ENSMUSG00000040485.4	1.641293008	0.64912778	16.67060767	4.44646E-05	0.004742082	Lrrc52	protein_coding	0.354898252	0.69564481	2.159865209	2.290770953
ENSMUSG00000033022.7	1.628499931	1.399520956	17.3472122	3.11355E-05	0.003699283	Cdo1	protein_coding	0.773545206	0.517742203	1.923266392	3.642359954
ENSMUSG00000053719.8	1.584080939	1.289427191	7.054231545	0.007907823	0.132071093	Klk1b26	protein_coding	0.497213853	1.224498851	1.664288829	5.355448849
ENSMUSG00000074181.1	1.521201235	1.628764091	21.39682357	3.73389E-06	0.000822972	Gm3776	protein_coding	1.381330725	1.209013386	5.228496054	5.212597199
ENSMUSG00000021702.7	1.494235339	1.786270839	29.1514549	6.69355E-08	2.99398E-05	Thbs4	protein_coding	0.493185817	0.390400368	1.674924989	1.83285474
ENSMUSG00000015090.7	1.459398062	8.579801241	14.82698474	0.000117837	0.009955941	Ptgds	protein_coding	81.74292636	52.13531309	206.9888051	307.5491905
ENSMUSG00000056501.3	1.450684433	3.463617952	10.50728934	0.001189046	0.046130113	Cebpb	protein_coding	1.952598166	4.364201894	7.397912998	16.14564224
ENSMUSG00000019997.4	1.448246913	6.630597532	18.05294876	2.14846E-05	0.002930455	Ctgf	protein_coding	13.06665738	13.54691746	58.25039304	44.3225701
ENSMUSG00000078164.1	1.409858849	0.809364324	17.88591053	2.34551E-05	0.003118891	Gm4392	protein_coding	2.042989936	2.156277267	8.936487947	6.993074317
ENSMUSG00000053166.7	1.403653986	1.846537701	9.763131481	0.001780464	0.057857465	Cdh22	protein_coding	0.319690092	0.35387685	0.83043598	1.644098936
ENSMUSG00000029019.8	1.402572556	8.614560915	15.53039103	8.11894E-05	0.007466117	Nppb	protein_coding	261.5747067	124.4758169	792.0163457	661.095404
ENSMUSG00000085945.2	1.377410197	-0.493468157	7.807319303	0.005203504	0.103509208	2310014F06Rik	lincRNA	0.658903243	0.139088114	1.537166884	1.563743947
ENSMUSG00000091626.1	1.302307473	0.609863087	8.402778533	0.003746479	0.085426526	Gm17462	protein_coding	0.215983655	0.341940484	1.3613934	0.549196936
ENSMUSG00000032265.8	1.300269338	4.277600991	11.87385151	0.000569276	0.028673696	Fam46a	protein_coding	1.203216361	1.574943446	5.971612877	3.704907616
ENSMUSG00000054716.3	1.249111413	2.155261144	19.94483755	7.97089E-06	0.001554119	Zfp771	protein_coding	1.304952972	1.666106703	4.739447145	5.158436751
ENSMUSG00000023905.8	1.241989039	5.454426152	28.12971488	1.13451E-07	4.79265E-05	Tnfrsf12a	protein_coding	23.76174114	19.12618686	81.66316672	62.19290766
ENSMUSG00000048967.8	1.233485974	1.470011156	18.06645635	2.13327E-05	0.002930455	Yjefn3	protein_coding	1.338237594	2.079433192	5.768909083	5.44598462
ENSMUSG00000028841.8	1.204516441	3.037289726	14.96318146	0.00010963	0.009527117	Cnksr1	protein_coding	1.095489755	1.079881315	3.239160538	3.806419439
ENSMUSG00000020205.6	1.181389016	3.634084544	10.19491152	0.001408287	0.050680425	Phlda1	protein_coding	2.330083602	3.346503268	12.54264187	5.75468007
ENSMUSG00000024558.5	1.150398755	2.364932315	18.35609831	1.83232E-05	0.002669789	Mapk4	protein_coding	0.393410202	0.488170496	1.423604537	1.317511396
ENSMUSG00000046997.5	1.149176173	1.77232268	12.42602727	0.000423392	0.023245268	Spsb4	protein_coding	0.475359681	0.257639589	1.485583301	0.870738457
ENSMUSG00000044533.9	1.143107976	6.295782364	22.43409183	2.17479E-06	0.000551237	Rps2	protein_coding	20.7518437	22.351597	67.62959653	65.93046977
ENSMUSG00000074264.5	1.142181751	4.390893295	15.19548985	9.69347E-05	0.008671661	Amy1	protein_coding	2.733014947	1.95548756	7.984753943	6.691983617
ENSMUSG00000074183.3	1.139132741	2.024485755	12.35030174	0.000440915	0.02377815	Gsta1	protein_coding	1.788782285	1.951972458	5.489278084	6.060664408
ENSMUSG00000041782.8	1.138044066	1.336422359	6.700583428	0.009638137	0.148057359	Lad1	protein_coding	0.202620481	0.519364905	0.807401466	1.387123896
ENSMUSG00000031734.8	1.137604415	3.606588447	24.58180804	7.12209E-07	0.000230453	Irx3	protein_coding	2.12626003	2.996543793	7.947343781	7.791358196
ENSMUSG00000064220.4	1.137127098	4.017491576	18.82176308	1.4352E-05	0.002282669	Hist2h2aa2	protein_coding	12.76544145	16.94689433	38.92028712	51.88853064
ENSMUSG00000030431.6	1.130940661	0.167575514	6.868739953	0.008771648	0.139538933	2210411K11Rik	protein_coding	0.495699244	0.25021969	0.786981384	1.534460352
ENSMUSG00000022129.2	1.08347374	1.877187112	14.62900411	0.000130885	0.010611824	Dct	protein_coding	0.674255467	0.723913826	1.998654491	2.148781017
ENSMUSG00000071076.4	1.069458166	5.828284005	13.09598425	0.000295929	0.018032144	Jund	protein_coding	9.710711551	11.35749286	24.92347067	36.40927817
ENSMUSG00000032565.7	1.068949378	1.821251484	13.14726937	0.000287939	0.018020451	Nudt16	protein_coding	0.951292413	1.004043225	2.430473934	3.293099625
ENSMUSG00000086983.2	1.064630475	1.008797416	9.094595052	0.00256366	0.06964089	Gm16972	lincRNA	1.614761179	1.342783774	4.615819812	4.153822715
ENSMUSG00000034173.7	1.054619633	3.052110897	18.97418042	1.32499E-05	0.002166721	2410018M08Rik	protein_coding	1.540167161	1.625572098	4.550785488	4.675974208
ENSMUSG00000040734.8	1.037395394	3.019223866	16.41837414	5.07905E-05	0.005193451	Ppp1r13l	protein_coding	0.897875767	1.446880671	3.085897853	3.611237347
ENSMUSG00000031616.7	1.034917279	4.041926446	16.41635299	5.08447E-05	0.005193451	Ednra	protein_coding	1.478595908	1.477281277	3.906841566	4.560461541
ENSMUSG00000027524.3	1.034596281	1.519787719	12.70664943	0.000364358	0.020831396	Edn3	protein_coding	0.40632634	0.332734531	1.215107306	0.920831408
ENSMUSG00000050064.7	1.031991033	2.753822195	8.903865117	0.002845677	0.075003557	Zfp697	protein_coding	0.501839098	0.594404016	1.560998928	1.572718923
ENSMUSG00000019944.7	1.029175498	6.026887232	13.86843504	0.000196064	0.014136387	Rhobtb1	protein_coding	4.079769067	5.203291389	13.84524736	12.71308897
ENSMUSG00000015579.4	1.028075515	4.676673134	26.76666788	2.29563E-07	8.95178E-05	Nkx2-5	protein_coding	8.860222442	8.713479154	25.4089574	24.9350776
ENSMUSG00000036752.4	1.025167529	7.574188677	20.93840432	4.7429E-06	0.000988083	Tubb2c	protein_coding	52.59017008	46.38883227	151.9452041	132.2779976
ENSMUSG00000085162.1	1.021064673	1.719499871	7.773418996	0.00530206	0.104186774	Gm12295	processed_transcript	0.281448795	0.492263596	1.211237594	0.979903399
ENSMUSG00000041889.7	1.01889675	1.280750671	7.148001788	0.007504756	0.126813691	Shisa4	protein_coding	0.345789946	0.541154403	1.215491607	1.289743545
ENSMUSG00000076612.2	1.01749241	3.669999106	17.73095152	2.54453E-05	0.003279419	Ighg2c	protein_coding	5.27250077	5.413787625	16.0075831	14.43805045
ENSMUSG00000087579.1	1.015354648	3.009403435	13.33261818	0.000260829	0.017021071	1500017E21Rik	lincRNA	1.190670138	0.773940127	3.291748719	2.365846036
ENSMUSG00000022615.6	1.003650801	0.725305245	8.267705084	0.004035649	0.088819311	Tymp	protein_coding	0.429434452	0.625912988	1.711209078	1.287945031
ENSMUSG00000020325.9	1.001905587	1.673653997	7.706467721	0.005502332	0.105789454	Fstl3	protein_coding	0.648551621	0.398263233	1.453214344	1.501504768
ENSMUSG00000037095.7	0.98428985	4.152405539	9.1360965	0.002506152	0.069173202	Lrg1	protein_coding	5.52407416	5.290125505	14.05110342	15.97382676
ENSMUSG00000037190.7	0.981071729	0.70696312	8.524550291	0.003503873	0.083391086	Cyb561d2	protein_coding	0.485195755	0.375540513	1.279563606	1.17363625
ENSMUSG00000060036.7	0.972880369	6.773722708	10.17578516	0.001422971	0.050680425	Rpl3	protein_coding	39.18629106	38.34720726	105.9239225	107.6564208
ENSMUSG00000029762.6	0.969494695	1.326514755	8.378806461	0.003796216	0.085657061	Akr1b8	protein_coding	0.908186091	0.530259812	2.146162716	1.851982744
ENSMUSG00000029725.4	0.967926246	0.978979697	8.468947994	0.003612603	0.084431621	2010007H12Rik	protein_coding	0.638788713	1.123684422	2.267758569	2.514530978
ENSMUSG00000047843.10	0.964003739	4.629615637	18.91508961	1.36667E-05	0.002211104	Bri3	protein_coding	8.37580253	6.787392659	19.83509415	21.7364511
ENSMUSG00000050503.8	0.960045732	5.275164191	9.593479565	0.001952696	0.060766099	Fbxl22	protein_coding	5.962183636	4.300721417	14.65872887	13.5521264
ENSMUSG00000022346.8	0.951536448	3.118926441	11.14802032	0.000841214	0.03686796	Myc	protein_coding	1.399896164	1.902870312	5.728132335	3.310690989
ENSMUSG00000020737.6	0.941324487	5.430208316	18.24904793	1.93823E-05	0.002729312	Hn1	protein_coding	10.40521881	10.40121208	33.17403797	23.40129148
ENSMUSG00000054426.5	0.931016783	0.797994928	7.026068047	0.008033154	0.132785467	A930005H10Rik	protein_coding	3.082725886	1.873324217	8.385631594	5.244048912
ENSMUSG00000090605.1	0.92277759	3.053266455	10.79157355	0.001019632	0.041169559	E230013L22Rik	lincRNA	1.86227238	2.129333494	6.327899131	4.355898233
ENSMUSG00000091937.1	0.920674939	1.426328389	10.13924123	0.001451459	0.051215285	Gm3646	protein_coding	8.756728605	8.487830548	26.64616318	19.33013151
ENSMUSG00000060032.4	0.908737043	2.729577469	8.999940907	0.002699883	0.072161382	H2afj	protein_coding	2.127182156	1.77947982	4.746777778	5.566119503
ENSMUSG00000001948.8	0.907129495	0.903358189	8.241610859	0.004094078	0.089845225	Spa17	protein_coding	1.609628435	1.69888512	4.438808901	4.27001356
ENSMUSG00000020902.6	0.906392476	5.927172441	12.82429436	0.000342148	0.020012998	Ntn1	protein_coding	4.925410366	4.999893715	13.14392629	12.95964982
ENSMUSG00000022037.8	0.896242203	8.937730475	7.506706565	0.006146967	0.11276607	Clu	protein_coding	61.53567432	57.02788693	148.0886533	161.2474813
ENSMUSG00000060981.4	0.891117404	3.488228049	9.64042684	0.00190341	0.059886465	Hist1h4h	protein_coding	11.65607798	15.53990866	31.26845679	38.89034016
ENSMUSG00000056708.4	0.888676748	6.101728628	10.25667813	0.001361907	0.050232117	Ier5	protein_coding	10.42977923	10.97097031	24.86746221	30.41641489
ENSMUSG00000039488.8	0.881894414	2.719661686	15.05693195	0.000104316	0.009170199	Cntn5	protein_coding	0.689611117	0.754808702	2.001292263	1.739784601
ENSMUSG00000074623.4	0.87814969	1.813554729	10.02412089	0.001545034	0.053160356	Gm826	protein_coding	0.966804713	1.244907166	2.82424771	2.859265064
ENSMUSG00000027293.7	0.872959379	7.708973673	8.625483988	0.003314924	0.080790636	Ehd4	protein_coding	26.20291301	24.03276545	78.12421583	52.48962868
ENSMUSG00000035049.3	0.863927596	4.134385294	7.674890929	0.005599448	0.105915923	Rrp12	protein_coding	2.222536252	1.750476118	6.272664051	4.017576955
ENSMUSG00000011148.6	0.863373368	5.743628974	14.18930921	0.000165307	0.012263364	Adssl1	protein_coding	19.60777891	15.6366505	51.48649667	39.39431865
ENSMUSG00000022554.6	0.861488562	0.775068787	7.271149443	0.007007095	0.122584488	Fam203a	protein_coding	0.530361443	0.52867252	1.255221205	1.452325112
ENSMUSG00000038550.4	0.856860341	2.354971089	7.814455587	0.005182996	0.103306687	Gm129	protein_coding	1.020739983	0.902273743	2.678964901	2.271069368
ENSMUSG00000039376.7	0.856793226	6.045466402	17.45747934	2.93806E-05	0.003569314	Synpo2l	protein_coding	7.336140928	8.40624817	22.83462909	17.37984646
ENSMUSG00000020990.4	0.854180617	2.824099734	12.54038271	0.000398251	0.022431841	Cdkl1	protein_coding	1.850737161	1.736323327	5.370948743	3.824463336
ENSMUSG00000078317.4	0.852408526	1.788838021	9.35368238	0.002225379	0.065461438	F8a	protein_coding	0.705142067	0.756444128	1.758772178	1.930938881
ENSMUSG00000042895.5	0.847136701	6.397451927	11.03501296	0.000894071	0.038232792	Abra	protein_coding	29.44236761	26.22653904	89.83996154	52.86896628
ENSMUSG00000045193.7	0.844189392	4.547112729	13.49481008	0.000239224	0.016241613	Cirbp	protein_coding	3.777931814	4.852730912	12.25453805	9.556573258
ENSMUSG00000038894.6	0.839233458	5.614822055	7.816969069	0.005175792	0.103298493	Irs2	protein_coding	5.916094864	6.432911718	19.36280917	11.99851824
ENSMUSG00000047963.5	0.83856152	2.11801125	7.306263551	0.006871466	0.121090678	Stbd1	protein_coding	0.890432751	1.336290623	2.836538924	2.724075226
ENSMUSG00000075514.4	0.832872233	2.947820216	14.0538741	0.000177648	0.013051513	Gm13375	processed_transcript	5.23436242	4.562264265	12.17708212	12.39164014
ENSMUSG00000072875.1	0.827866091	1.243435335	6.962815942	0.008322095	0.134853708	Gpr27	protein_coding	1.389346756	1.146449144	2.728783674	3.59702295
ENSMUSG00000045176.2	0.826601951	2.712298655	12.62718506	0.000380177	0.02149344	2310047M10Rik	protein_coding	1.965002397	2.023380667	5.152958343	4.790314151
ENSMUSG00000067455.3	0.824475078	2.133473196	8.004515643	0.004666084	0.096022356	Hist1h4j	protein_coding	5.808453783	7.342394052	13.97538538	18.40251036
ENSMUSG00000044177.4	0.824384956	2.369731363	8.370041367	0.003814569	0.085943661	Wfikkn2	protein_coding	0.835173645	0.524126496	1.865968054	1.555581097
ENSMUSG00000025268.8	0.821015808	3.671401488	10.44158734	0.001232093	0.0472922	Maged2	protein_coding	2.568619709	1.91091662	5.943526877	5.263159126
ENSMUSG00000058351.5	0.81916466	3.475608885	16.00404758	6.32072E-05	0.006201646	2010107H07Rik	protein_coding	11.05866747	9.60606854	26.50373957	24.92293629
ENSMUSG00000090687.1	0.818655667	0.962922992	6.73004616	0.009480215	0.146817825	9330151L19Rik	lincRNA	0.294054566	0.54909917	1.118486465	0.960081665
ENSMUSG00000015337.5	0.814242706	4.789330777	10.88062856	0.000971753	0.040049902	Endog	protein_coding	14.19604965	15.0978398	35.51624715	36.68131369
ENSMUSG00000041203.8	0.813207725	3.956977397	17.44628931	2.95541E-05	0.003569314	2310036O22Rik	protein_coding	9.525900712	10.36190785	24.79644963	24.22218242
ENSMUSG00000028329.7	0.810046524	1.656574681	8.003707017	0.004668168	0.096022356	Xpa	protein_coding	0.839504485	0.805505876	1.788190792	2.236176178
ENSMUSG00000031737.8	0.809746654	2.078554821	7.522041895	0.006094856	0.112249205	Irx5	protein_coding	1.236864421	0.735108159	2.685746414	2.219629807
ENSMUSG00000025351.7	0.805682582	4.581578774	13.7410412	0.000209819	0.014772823	Cd63	protein_coding	11.40186287	12.86610417	28.56994614	30.75994744
ENSMUSG00000026202.7	0.802779309	9.002399128	11.11627814	0.000855733	0.03712333	Tuba4a	protein_coding	153.8725049	144.842497	430.601291	307.8101716
ENSMUSG00000003617.10	0.800231022	6.561416475	11.28343228	0.000782018	0.035296851	Cp	protein_coding	5.121941739	5.326416043	13.56757473	12.03623567
ENSMUSG00000025226.4	0.797218515	1.233062593	6.63711931	0.009987531	0.151756661	Fbxl15	protein_coding	1.241653482	0.790822175	2.410276878	2.608701161
ENSMUSG00000074922.1	0.787439123	2.600234942	10.71385145	0.001063364	0.042445267	Fam122a	protein_coding	3.369099329	4.373783719	9.739355395	8.995189857
ENSMUSG00000049940.7	0.772667799	3.922314498	11.62081985	0.000652176	0.031273273	Pgrmc2	protein_coding	2.114159237	3.065821514	6.162946223	6.190709538
ENSMUSG00000022197.8	0.772639651	4.959697151	7.968694114	0.004759326	0.096722085	Pdzd2	protein_coding	1.011182407	1.191099423	2.318223959	2.915472545
ENSMUSG00000002108.4	0.770416485	3.350508619	9.909866125	0.001643951	0.05543504	Nr1h3	protein_coding	2.020706726	2.290291706	4.524318609	5.722079804
ENSMUSG00000024871.4	0.76756076	5.426593163	12.42714515	0.000423138	0.023245268	Doc2g	protein_coding	8.8573521	6.986250315	21.75025988	16.52188075
ENSMUSG00000022995.9	0.767548262	5.73461609	14.92723493	0.000111738	0.009575224	Enah	protein_coding	6.802394512	7.229358668	19.30563709	14.45011642
ENSMUSG00000031824.8	0.76642561	3.286513162	14.38671382	0.000148849	0.011375343	6430548M08Rik	protein_coding	0.905522548	0.905191646	2.15269297	2.169697683
ENSMUSG00000059852.5	0.760003819	4.770634907	10.55751173	0.001157169	0.045123642	Kcng2	protein_coding	17.65561189	28.25391952	58.76160275	50.13822374
ENSMUSG00000028128.8	0.758351707	2.960900468	11.11395711	0.000856805	0.03712333	F3	protein_coding	2.446398511	2.208550656	5.548060943	5.540484388
ENSMUSG00000073600.1	0.749672863	4.572603708	14.19940804	0.000164422	0.012263364	Gm1614	protein_coding	4.715958144	4.605413164	12.06009883	10.04424681
ENSMUSG00000002393.8	0.7440724	4.082836932	10.03163529	0.001538744	0.053063977	Nr2f6	protein_coding	3.207635979	3.66083216	8.011360824	8.095810281
ENSMUSG00000032666.10	0.743434054	4.369028647	7.30883342	0.006861646	0.121090678	1700025G04Rik	protein_coding	1.428091854	1.026431315	3.043691643	2.763040417
ENSMUSG00000047205.6	0.742004885	4.720382547	15.43467826	8.54065E-05	0.007685579	Dusp18	protein_coding	3.094710566	3.46964262	7.724591983	7.649134443
ENSMUSG00000075585.2	0.738051849	3.495461585	9.411047062	0.00215682	0.064189673	6330403L08Rik	protein_coding	1.204050183	1.144285303	3.370422426	2.190952143
ENSMUSG00000086040.2	0.73802667	2.863756807	10.06607183	0.001510247	0.052340951	Wipf3	protein_coding	0.627769817	0.658306027	1.799344755	1.231072458
ENSMUSG00000031617.9	0.736595521	3.007722128	8.029818338	0.004601345	0.095859262	Tmem184c	protein_coding	1.304448698	1.376782638	3.178710057	3.092882371
ENSMUSG00000060708.3	0.734096553	1.685008979	7.351813884	0.006699513	0.11944454	Cno	protein_coding	1.234665183	1.79180307	3.555738688	3.471529996
ENSMUSG00000038193.3	0.733573821	3.96068164	14.39607545	0.000148111	0.011375343	Hand2	protein_coding	3.904141875	3.875843207	8.998258099	9.173777743
ENSMUSG00000025856.9	0.732592255	3.281140767	11.27506727	0.00078555	0.035345105	Pdgfa	protein_coding	1.990989147	2.003653737	5.100371388	4.2728952
ENSMUSG00000051502.5	0.731820959	1.659668395	7.55507441	0.005984133	0.111017504	Ufsp1	protein_coding	1.937418346	1.648089308	4.135606949	4.275966246
ENSMUSG00000029722.9	0.730560432	2.987963128	8.030484852	0.004599653	0.095859262	Agfg2	protein_coding	1.025134499	1.218229314	2.668835821	2.557667561
ENSMUSG00000024471.6	0.73037447	6.10887815	9.41927151	0.002147168	0.064088596	Myot	protein_coding	15.47858303	19.7478978	41.28744481	40.54085635
ENSMUSG00000029815.7	0.726531428	3.504027469	11.83010627	0.000582807	0.029060079	2410003K15Rik	protein_coding	2.011708383	2.103509832	4.939907743	4.637640115
ENSMUSG00000035505.8	0.723246733	2.225434657	8.525217785	0.003502588	0.083391086	Cox18	protein_coding	1.020389454	1.410681394	3.126845679	2.518717676
ENSMUSG00000036615.4	0.721463357	1.789849184	7.314572658	0.006839766	0.121090678	Rfxap	protein_coding	0.82663147	1.153911429	2.373388889	2.190601593
ENSMUSG00000030739.9	0.718408633	6.100045928	17.32928709	3.14305E-05	0.003705392	Myh14	protein_coding	5.534634716	6.018683966	14.0204286	12.69919633
ENSMUSG00000038670.8	0.717599611	4.242352991	6.809587701	0.00906697	0.141927728	Mybpc2	protein_coding	2.520770647	2.033542735	5.520836902	5.067182171
ENSMUSG00000030096.7	0.715159912	5.974020923	8.013576667	0.004642795	0.096022356	Slc6a6	protein_coding	5.979773559	6.775215419	15.00215234	14.36477918
ENSMUSG00000070803.4	0.707298022	3.62285357	7.165275353	0.007432828	0.126441218	Cited4	protein_coding	5.447702282	6.498708622	13.23374623	14.07163809
ENSMUSG00000079243.2	0.706745815	8.570853218	7.220210749	0.007208724	0.124579864	Xirp1	protein_coding	35.05799553	40.26981425	110.9397989	63.75588411
ENSMUSG00000061024.7	0.706140605	2.855494144	7.665663457	0.005628156	0.106202062	Rrs1	protein_coding	1.814077208	2.166991907	4.407538093	4.678797377
ENSMUSG00000028396.5	0.703151702	5.401117048	13.33447764	0.000260571	0.017021071	2310002L09Rik	protein_coding	12.02954504	10.42784358	29.43442759	22.35696135
ENSMUSG00000020230.7	0.69806934	2.164934789	7.57980591	0.00590258	0.109738912	Prmt2	protein_coding	0.800488627	0.73926747	1.757676768	1.756117272
ENSMUSG00000030137.7	0.696738783	6.976089387	8.838023886	0.002950184	0.076044746	Tuba8	protein_coding	36.39282884	34.11564115	84.86991588	76.12685902
ENSMUSG00000033307.6	0.694996585	5.579277494	11.38945747	0.000738621	0.033834181	Mif	protein_coding	56.55207488	43.37437166	118.0597051	110.2468954
ENSMUSG00000031765.6	0.693195481	6.97511503	8.849447868	0.002931776	0.075827286	Mt1	protein_coding	79.57346056	89.76832059	186.1201805	196.9715933
ENSMUSG00000021255.10	0.692812615	4.377145505	9.479988478	0.002077253	0.06291913	Esrrb	protein_coding	1.877788746	1.901431511	4.858342301	3.778252526
ENSMUSG00000026558.8	0.689894719	4.544720638	8.799867524	0.003012524	0.076999106	Uck2	protein_coding	8.562092643	10.57360307	23.93784577	19.51863522
ENSMUSG00000007836.6	0.689824442	3.978414536	6.89780358	0.008630171	0.137865174	Hnrnpa0	protein_coding	3.278107218	4.287987311	8.339812533	8.711780591
ENSMUSG00000020308.5	0.688931286	2.079383569	7.21651501	0.007223582	0.124694929	Gm16517	protein_coding	2.172961771	2.293456265	5.536707636	4.659928503
ENSMUSG00000034168.6	0.685628786	3.950885974	10.2640942	0.001356443	0.050232117	6430527G18Rik	protein_coding	2.057650166	2.629738618	5.356177882	5.193802167
ENSMUSG00000031808.6	0.68467593	6.50842273	13.52286183	0.000235675	0.016072384	Slc27a1	protein_coding	16.99840845	20.51803915	48.56111646	36.47622098
ENSMUSG00000039221.5	0.684392688	3.558134245	8.661365292	0.003250277	0.080208138	Rpl22l1	protein_coding	15.9581384	12.33486925	34.65963376	29.64727074
ENSMUSG00000027244.8	0.682339752	4.194702697	11.11819131	0.000854851	0.03712333	Atg13	protein_coding	2.249888871	2.514334348	5.698510847	5.055664629
ENSMUSG00000070576.4	0.678118169	3.134586633	6.855816068	0.008835319	0.140209978	Mn1	protein_coding	0.742318735	0.910414367	1.63418023	2.049776453
ENSMUSG00000057880.6	0.671894589	4.298334638	9.28854656	0.00230591	0.066781532	Abat	protein_coding	1.574463363	1.158917671	3.465823257	2.71632236
ENSMUSG00000012117.7	0.671540275	4.258128531	13.08538451	0.000297609	0.018032144	Dhdds	protein_coding	2.767428538	3.105957235	7.110384107	6.043802464
ENSMUSG00000047045.10	0.657663337	4.183865649	8.007840949	0.004657523	0.096022356	Tmem164	protein_coding	1.825598683	1.593853534	4.057585124	3.553551843
ENSMUSG00000042529.8	0.657202403	3.71281365	6.73865509	0.009434572	0.146259917	Kcnj12	protein_coding	2.640411975	3.140710237	7.349112168	5.494546265
ENSMUSG00000001151.8	0.656863348	6.03512263	10.04136	0.001530642	0.052904538	Pcnt	protein_coding	3.887630987	4.56409749	9.730527564	8.968352476
ENSMUSG00000044991.4	0.655954075	4.024611262	6.927720669	0.008486978	0.136006287	1110034G24Rik	protein_coding	3.434661906	4.517014427	7.797117791	9.629307639
ENSMUSG00000063953.2	0.655864772	3.940997733	8.872583325	0.002894852	0.075563187	Amd2	protein_coding	3.003088801	3.027267285	6.689495475	6.647791273
ENSMUSG00000034135.7	0.655294013	5.495862898	10.95336919	0.000934336	0.039048864	Sik3	protein_coding	3.638693924	3.93915934	9.550642391	7.297718208
ENSMUSG00000036181.1	0.654918401	5.847926871	12.3799843	0.000433961	0.023654752	Hist1h1c	protein_coding	20.78088128	22.77080892	46.58378303	49.40082936
ENSMUSG00000041629.6	0.652397597	3.215658227	9.126534114	0.002519285	0.069282626	D11Wsu99e	protein_coding	2.190264298	1.9544527	4.377583951	4.770938245
ENSMUSG00000027999.8	0.651870768	4.874737388	9.094090248	0.002564367	0.06964089	Pla2g12a	protein_coding	9.84991094	10.23195653	21.16489538	23.02142465
ENSMUSG00000063320.3	0.650204836	2.716174105	7.768514195	0.005316476	0.104192981	1190007I07Rik	protein_coding	5.677181095	5.747419575	12.0457008	13.11381346
ENSMUSG00000043445.6	0.650031137	3.192878669	8.787820171	0.003032484	0.077074634	Pgp	protein_coding	5.164944314	5.658737716	12.21452693	11.56847797
ENSMUSG00000023959.7	0.648411432	7.554153057	7.153980391	0.00747978	0.126673162	Clic5	protein_coding	19.36996848	16.38304748	43.28614368	35.92895401
ENSMUSG00000026335.9	0.637083038	8.772788451	6.951222299	0.008376198	0.135234115	Pam	protein_coding	30.51280818	30.18842304	76.33710786	57.17046721
ENSMUSG00000000305.6	0.636676043	3.093169294	6.957035081	0.008349028	0.135076607	Cdh4	protein_coding	0.551388827	0.851860776	1.531941613	1.509905839
ENSMUSG00000024866.9	0.63560562	3.77516907	8.170629978	0.004257412	0.091450166	Acy3	protein_coding	5.412764865	4.153003443	10.33799012	10.61728134
ENSMUSG00000041798.9	0.635430279	4.664077699	9.398878053	0.002171183	0.064365196	Gck	protein_coding	5.550674759	4.200411944	11.0815742	10.3113521
ENSMUSG00000026208.9	0.635335522	10.51378435	13.09270318	0.000296448	0.018032144	Des	protein_coding	212.657064	217.7936936	492.3321192	448.0709383
ENSMUSG00000029381.9	0.634117318	4.96843631	7.035312372	0.007991793	0.132540014	Shroom3	protein_coding	2.007356391	2.671875478	5.74628591	4.468761212
ENSMUSG00000019851.7	0.633083026	6.499978733	7.786837546	0.005262824	0.103944182	Perp	protein_coding	25.80091058	25.91963428	64.04926571	49.27403187
ENSMUSG00000042613.3	0.632545839	5.986714703	7.909951013	0.00491636	0.098899476	Pbxip1	protein_coding	7.743726331	7.867044047	17.97785388	16.07707236
ENSMUSG00000029014.8	0.631650014	3.90546043	9.818868538	0.001727306	0.056910908	Dnajc2	protein_coding	1.87070349	1.532308654	3.928824846	3.527732165
ENSMUSG00000020955.7	0.627364365	4.806883638	9.212076903	0.002404238	0.068088732	Ap4s1	protein_coding	16.14045098	16.603408	36.12396512	34.95044734
ENSMUSG00000017817.4	0.625821438	7.673046262	9.224288464	0.002388255	0.068050837	Jph2	protein_coding	26.98443198	33.38360239	70.83052404	60.09742846
ENSMUSG00000054499.8	0.625346393	3.073091597	8.191711079	0.004208221	0.090602978	Dedd2	protein_coding	2.651516286	2.981785684	7.203923123	5.099867911
ENSMUSG00000015202.7	0.6234626	4.102294191	8.953677796	0.002769115	0.073367084	Cnksr3	protein_coding	2.452852327	2.668280342	6.433583108	4.7182526
ENSMUSG00000037411.4	0.617943287	6.235829314	7.796054875	0.005236043	0.103684565	Serpine1	protein_coding	15.36421039	13.1844614	37.44540302	24.82560711
ENSMUSG00000049422.6	0.615218459	8.686784402	7.967069057	0.004763601	0.096722085	Chchd10	protein_coding	272.8272855	284.9679919	593.385016	604.4394603
ENSMUSG00000023806.8	0.6143516	5.328400196	11.56343777	0.000672614	0.031913791	Rsph3b	protein_coding	11.66087937	11.9138977	25.83778364	24.86201765
ENSMUSG00000026473.9	0.612693731	8.583154628	8.194771383	0.004201129	0.090602978	Glul	protein_coding	56.26121804	64.59628047	136.088916	123.4529401
ENSMUSG00000034620.10	0.611786617	3.646774493	9.506689537	0.002047242	0.062669095	Tmem5	protein_coding	1.277734075	1.224018399	2.748188962	2.627693094
ENSMUSG00000038463.8	0.608978274	3.249056224	7.683786934	0.005571912	0.105863938	Olfml2b	protein_coding	1.947965866	2.754428255	5.133415582	4.913123642
ENSMUSG00000003380.9	0.608340556	6.237543223	10.08532357	0.001494549	0.052011679	Rabac1	protein_coding	53.97250655	50.71733496	112.7102075	111.5719554
ENSMUSG00000002100.8	0.603807144	11.48894446	7.286189857	0.006948669	0.12188623	Mybpc3	protein_coding	446.9601801	386.2143482	1078.214505	721.1325046
ENSMUSG00000038900.11	0.602914824	6.475160889	12.32211451	0.000447623	0.023940731	Rpl12	protein_coding	20.16695319	20.44687714	42.36588149	44.10713592
ENSMUSG00000043822.11	0.602777829	5.376673173	11.78936153	0.000595702	0.029337538	Adamtsl5	protein_coding	5.174092507	5.254685942	12.17544581	10.15386472
ENSMUSG00000028645.4	0.601617832	3.80157294	7.301124718	0.006891146	0.121180088	Slc2a1	protein_coding	2.47109976	3.666341792	6.748967865	6.267593112
ENSMUSG00000029651.9	0.597433232	7.058433192	11.95024078	0.000546403	0.027884898	Mtus2	protein_coding	7.874716798	8.941033749	19.15829448	16.62315135
ENSMUSG00000024914.10	0.595785722	6.473229825	11.58782056	0.000663852	0.031648453	Drap1	protein_coding	29.96404832	32.272097	64.17769797	67.52340349
ENSMUSG00000078566.2	0.595098175	7.029936605	9.809761173	0.00173588	0.056953624	Bnip3	protein_coding	31.76522268	36.82017635	68.75461646	75.99842439
ENSMUSG00000038880.7	0.595037443	4.49216487	10.95769833	0.000932155	0.039048864	Mrps34	protein_coding	6.358090949	7.344852168	14.8187276	14.21562834
ENSMUSG00000015365.8	0.587311385	5.186234516	8.354275352	0.003847809	0.085998475	Mov10l1	protein_coding	5.468624208	4.843729172	12.89861174	9.096061638
ENSMUSG00000035828.9	0.582981072	5.696699144	7.225839999	0.007186154	0.124349225	Pim3	protein_coding	10.98463098	13.75657277	24.07218007	27.61680393
ENSMUSG00000004035.6	0.57901909	4.483331608	9.828075896	0.00171868	0.056910908	Gstm7	protein_coding	8.543130705	8.940609567	20.17041193	16.66777826
ENSMUSG00000031490.5	0.577871814	5.272653852	7.239301907	0.007132471	0.12368371	Eif4ebp1	protein_coding	19.74037285	21.92178475	45.16341725	42.17367242
ENSMUSG00000005836.8	0.575401098	4.986553164	7.451079622	0.006339841	0.115055254	Gata6	protein_coding	5.200104915	6.946331859	13.3236788	12.03955644
ENSMUSG00000058779.7	0.573462445	5.528052282	11.06390826	0.000880244	0.037922808	Tomm20	protein_coding	19.52978574	19.53127997	42.24805024	39.50655318
ENSMUSG00000000740.5	0.572710551	4.275864631	8.525412396	0.003502214	0.083391086	Rpl13	protein_coding	4.607458565	5.302684975	11.1490426	9.580134562
ENSMUSG00000002831.7	0.570406627	7.855626859	7.210909366	0.007246177	0.124801656	Plin4	protein_coding	20.95066151	27.55595508	51.74477932	49.11606315
ENSMUSG00000058135.6	0.568516603	7.020550749	9.377856014	0.002196223	0.064980844	Gstm1	protein_coding	57.93863939	59.46434999	114.5878396	128.9552841
ENSMUSG00000027238.9	0.565661645	6.720479605	7.390789505	0.006555871	0.117925292	Frmd5	protein_coding	8.5259553	9.188137022	19.63997124	17.2483233
ENSMUSG00000024661.6	0.561270234	8.714394899	7.325257566	0.006799222	0.120797392	Fth1	protein_coding	291.4260758	325.7291952	589.7550165	681.5856942
ENSMUSG00000027488.6	0.560740204	5.432604381	8.487067611	0.003576798	0.084074113	Snta1	protein_coding	8.263237578	7.628806458	16.47447315	16.48559656
ENSMUSG00000047260.4	0.560392054	4.742480203	8.584282492	0.00339077	0.081968791	Tmem93	protein_coding	11.81020722	11.39052576	23.82421839	24.19976546
ENSMUSG00000026207.9	0.554071511	7.10981191	7.680271322	0.005582777	0.105863938	Speg	protein_coding	6.374093162	8.09639817	16.3607381	13.51203051
ENSMUSG00000073469.4	0.553487344	5.539403239	8.71853408	0.003149912	0.078530924	Rnaset2a	protein_coding	27.59715166	27.61513226	56.72546534	57.01189741
ENSMUSG00000031770.9	0.545305487	6.89742866	7.745562204	0.005384469	0.104848927	Herpud1	protein_coding	28.58632195	32.45918212	63.35530453	61.54196401
ENSMUSG00000027956.5	0.54508738	4.771274396	9.016870279	0.00267499	0.071875005	Tmem144	protein_coding	6.507838028	6.782542321	14.24888493	13.03030564
ENSMUSG00000031811.8	0.540916777	4.774217509	7.719993146	0.00546126	0.105533479	Fbxo31	protein_coding	7.979888593	9.479380059	17.29266588	18.26068141
ENSMUSG00000006221.7	0.538830074	10.04651409	10.28509606	0.00134109	0.049866265	Hspb7	protein_coding	218.2144929	237.3523241	507.4737143	424.7208881
ENSMUSG00000071317.3	0.537393909	4.559909338	7.991235336	0.004700433	0.096463943	Bves	protein_coding	8.601042998	10.19849025	21.51833012	16.90087717
ENSMUSG00000031879.7	0.533558302	4.317416903	6.872621361	0.008752617	0.139381993	Fam96b	protein_coding	10.96080315	11.39847222	21.05000686	24.23982819
ENSMUSG00000070493.3	0.532427647	8.397061205	7.952036087	0.004803331	0.097269045	Chchd2	protein_coding	88.10664576	96.90552058	191.3116234	184.158878
ENSMUSG00000026078.5	0.530351082	4.720360739	7.779371065	0.005284619	0.10410426	Pdcl3	protein_coding	9.647118656	8.788732462	19.08111593	18.39946412
ENSMUSG00000040562.6	0.530080692	6.16538573	10.23916182	0.0013749	0.050232117	Gstm2	protein_coding	26.91362281	27.58872077	56.735792	53.83733141
ENSMUSG00000006715.4	0.529949586	4.40388271	6.709470062	0.009590222	0.147649195	Gmnn	protein_coding	11.85449808	9.505923401	23.48044184	20.1637587
ENSMUSG00000063802.4	0.528602707	3.619947338	6.854568783	0.008841489	0.140209978	Hspbp1	protein_coding	5.229525085	5.396399533	11.29889912	10.24784641
ENSMUSG00000062077.7	0.524627833	6.959141739	9.553552158	0.001995629	0.061686015	Trim54	protein_coding	49.70094386	56.52156268	105.2522112	108.6863578
ENSMUSG00000024425.3	0.518322492	4.972652389	8.198320017	0.00419292	0.090602978	Ndfip1	protein_coding	20.22161189	21.90285798	45.15273685	39.69340784
ENSMUSG00000079724.3	0.515996445	5.496094805	8.01796348	0.004631562	0.096022356	Rnaset2b	protein_coding	28.31358862	26.73798129	54.19658218	56.30562477
ENSMUSG00000002984.10	0.515659977	5.111009433	8.880960179	0.0028816	0.075563187	Tomm40	protein_coding	4.930224178	5.232323241	11.26728651	9.208456901
ENSMUSG00000038370.6	0.513753204	6.198515626	7.886342914	0.004980948	0.099802709	Pcp4l1	protein_coding	29.86888495	28.24531429	57.87644347	58.64097116
ENSMUSG00000049550.10	0.508414867	7.783106941	9.731473026	0.001811393	0.058363684	Clip1	protein_coding	14.25207287	14.00432681	31.10589026	25.60570236
ENSMUSG00000072528.3	0.507754072	3.578201373	6.811292032	0.00905832	0.141927728	Rps19-ps4	protein_coding	16.72498944	16.16447571	33.44123152	32.28754847
ENSMUSG00000003423.8	0.506773965	3.897365686	7.286421072	0.006947775	0.12188623	Pih1d1	protein_coding	4.778659454	4.696327569	9.904528581	9.050310899
ENSMUSG00000021476.8	0.50578564	4.760893945	7.803825105	0.005213575	0.103509208	Habp4	protein_coding	6.2088365	6.410667951	13.2970396	11.91993848
ENSMUSG00000055401.8	0.50514117	4.209059345	7.603100242	0.005826802	0.10867486	Fbxo6	protein_coding	5.558248189	5.190094041	11.26232962	10.24252285
ENSMUSG00000035203.8	0.50405763	6.298988999	8.483204562	0.003584402	0.084122806	Epn1	protein_coding	17.34758637	20.25228322	37.361224	37.33871804
ENSMUSG00000046364.8	0.501669361	5.623583855	8.454610605	0.003641192	0.084736058	Rpl27a	protein_coding	11.42788283	11.02084305	22.5985665	22.08469379
ENSMUSG00000041936.10	-0.515574771	5.001125103	8.427323602	0.00369624	0.085261134	Agrn	protein_coding	3.634218551	3.981500471	3.876072186	3.607538338
ENSMUSG00000027200.11	-0.529051768	4.010358227	7.363063172	0.006657727	0.119118493	Sema6d	protein_coding	1.71256046	1.686446681	1.629023077	1.675399161
ENSMUSG00000004880.6	-0.535959797	3.719673326	7.000151438	0.008150282	0.133566261	Lbr	protein_coding	4.002227105	3.837801659	3.663457307	3.920497644
ENSMUSG00000019899.8	-0.551709665	5.89475935	8.091450538	0.004447455	0.093679917	Lama2	protein_coding	5.294639672	6.886291574	6.601262489	5.100630577
ENSMUSG00000039115.7	-0.555033963	4.687939987	7.521511783	0.006096649	0.112249205	Itga9	protein_coding	3.335896611	3.524842809	3.93233811	2.67463712
ENSMUSG00000028763.10	-0.579755588	7.155961792	7.24214823	0.007121173	0.12362876	Hspg2	protein_coding	10.57667543	12.12360341	9.34457612	11.80448272
ENSMUSG00000025810.8	-0.582367324	6.543764804	8.443730657	0.00366304	0.084919619	Nrp1	protein_coding	16.7991987	16.98831038	14.58946909	16.96162854
ENSMUSG00000027940.11	-0.592796333	4.250856885	6.941043088	0.008423997	0.135568417	Tpm3	protein_coding	3.421752952	3.291362553	2.675150133	3.536469061
ENSMUSG00000062949.6	-0.598945534	2.658231851	7.006482577	0.008121509	0.133566261	Atp11c	protein_coding	0.81181404	1.006567909	0.827429921	0.852527373
ENSMUSG00000020019.4	-0.600564908	2.662059085	6.709111763	0.009592149	0.147649195	Ntn4	protein_coding	1.735582939	1.9295213	1.86604785	1.531414532
ENSMUSG00000035849.8	-0.602511943	3.705509118	7.049927188	0.007926847	0.132183656	Krt222	protein_coding	3.423583182	3.964603828	4.023220795	2.841282264
ENSMUSG00000027111.8	-0.602814005	6.030199179	8.656269805	0.003259379	0.080208138	Itga6	protein_coding	7.610500954	7.522676155	7.519865693	6.52191911
ENSMUSG00000043131.8	-0.606785949	3.849178131	7.092532887	0.007740577	0.13007591	Mob1a	protein_coding	3.120084453	3.21061245	2.469593955	3.325387534
ENSMUSG00000017677.5	-0.608540354	3.360359749	8.381756666	0.003790059	0.085657061	Wsb1	protein_coding	2.720219439	3.023776294	2.575696868	2.704211464
ENSMUSG00000003476.8	-0.611513681	3.909908736	8.570643869	0.003416263	0.082076668	Crhr2	protein_coding	2.413180941	3.243254257	2.659320056	2.516666251
ENSMUSG00000020130.8	-0.617627497	2.694115517	7.180246137	0.007371059	0.125832498	Tbc1d15	protein_coding	1.332893195	1.827228744	1.60837749	1.27958117
ENSMUSG00000028024.7	-0.62066851	2.212118692	6.909147678	0.008575586	0.137281591	Enpep	protein_coding	1.129521639	0.99778238	1.139460725	0.806881713
ENSMUSG00000028032.9	-0.622385358	2.174187164	6.653227157	0.00989764	0.150824956	Papss1	protein_coding	1.768366917	2.159889122	1.624460995	1.949158403
ENSMUSG00000070327.6	-0.631014573	5.663572148	7.978620043	0.004733301	0.096576618	Rnf213	protein_coding	3.451358946	3.004768586	2.691626065	3.147255899
ENSMUSG00000032849.7	-0.633166011	3.054028104	9.545981496	0.002003876	0.06181532	Abcc4	protein_coding	1.646140277	1.502922985	1.436658826	1.424224227
ENSMUSG00000021065.8	-0.640597749	3.308516949	10.29860464	0.001331308	0.049859685	Fut8	protein_coding	2.949673915	3.428161407	3.061066111	2.684649864
ENSMUSG00000032349.7	-0.644705966	3.387541189	9.448034311	0.002113755	0.063781723	Elovl5	protein_coding	3.383508177	3.009087382	2.704828352	3.028606502
ENSMUSG00000047793.7	-0.648205494	3.010759675	6.726049561	0.00950148	0.14699747	Sned1	protein_coding	0.78765205	1.065641448	0.930022592	0.732840089
ENSMUSG00000068036.7	-0.654680315	5.204860364	7.665539858	0.005628542	0.106202062	Mllt4	protein_coding	4.259187128	3.481822276	3.046733112	3.836179847
ENSMUSG00000010307.5	-0.658880741	2.512872994	7.787231331	0.005261677	0.103944182	Tmem86a	protein_coding	2.928704533	3.617613385	3.060391465	2.754077087
ENSMUSG00000024044.8	-0.67370572	2.402635693	7.714167957	0.005478911	0.105740194	Epb4.1l3	protein_coding	0.826585598	1.144073312	0.91874289	0.813232107
ENSMUSG00000030560.9	-0.675725602	3.672092832	6.839646227	0.008915649	0.14094511	Ctsc	protein_coding	2.190694017	2.930848149	2.025539535	2.4417404
ENSMUSG00000002983.9	-0.678352013	2.045224791	7.554526725	0.005985952	0.111017504	Relb	protein_coding	1.150290632	1.29240374	0.925875378	1.199001703
ENSMUSG00000037119.3	-0.684270593	3.202552688	10.92334671	0.000949599	0.039565761	D15Ertd621e	protein_coding	1.639861093	1.866436413	1.470405186	1.583655833
ENSMUSG00000022235.8	-0.687276449	4.128945075	10.85831806	0.00098353	0.040316769	Cmbl	protein_coding	13.12535979	14.15163652	14.01830733	9.905041627
ENSMUSG00000031109.9	-0.689579706	2.109826927	8.47408489	0.003602416	0.08441531	Enox2	protein_coding	0.8951912	1.042813587	0.877736353	0.808042028
ENSMUSG00000061232.8	-0.691795897	6.073242368	7.079703507	0.007796191	0.130629585	H2-K1	protein_coding	34.88466143	29.74925369	22.21586016	33.49198125
ENSMUSG00000023336.5	-0.691928101	3.047690779	7.605006116	0.005820647	0.10867486	Wfdc1	protein_coding	6.703948942	7.755565528	7.295973252	5.32443942
ENSMUSG00000022673.3	-0.698524319	1.974500771	7.758168133	0.005347016	0.104392973	Mcm4	protein_coding	1.127370601	1.079395909	0.955643852	0.959223544
ENSMUSG00000020467.8	-0.705781274	2.847575867	7.89892834	0.004946409	0.099241418	Efemp1	protein_coding	4.885293803	3.282575598	3.435517513	3.636099501
ENSMUSG00000059552.6	-0.722036308	2.156719046	7.405102061	0.006503915	0.117425283	Trp53	protein_coding	1.318187229	1.180710433	0.867277653	1.248755024
ENSMUSG00000026532.7	-0.722158944	4.341675542	6.686081566	0.009716855	0.148965657	Spna1	protein_coding	1.716178657	2.624085796	2.23874366	1.471157128
ENSMUSG00000091474.1	-0.724951024	2.170120888	8.854575772	0.002923551	0.07579588	2610021A01Rik	protein_coding	0.928364674	1.314054495	0.941651375	0.945936616
ENSMUSG00000027820.6	-0.726417426	2.576079143	8.491655927	0.003567789	0.083992167	Mme	protein_coding	1.400616981	1.499202727	1.427363768	1.049309062
ENSMUSG00000021262.8	-0.727226903	1.791739128	7.008280983	0.008113355	0.133566261	Evl	protein_coding	1.504143076	1.349417853	0.98078804	1.412193649
ENSMUSG00000034487.3	-0.731114338	2.134289011	8.877355656	0.002887294	0.075563187	Kdelc2	protein_coding	1.226533768	1.394770199	0.963164786	1.235135403
ENSMUSG00000022885.8	-0.731484854	2.338575065	8.21696015	0.004150066	0.090163153	St6gal1	protein_coding	1.261677193	0.990987445	0.839267574	1.068620106
ENSMUSG00000043110.2	-0.737728937	2.138560286	8.357458317	0.003841075	0.085998475	Lrrn4	protein_coding	1.225335069	1.235984717	1.250738272	0.828236349
ENSMUSG00000070348.4	-0.738262643	4.239978945	10.19796814	0.001405955	0.050680425	Ccnd1	protein_coding	6.212671943	5.534351153	4.651897306	5.225147226
ENSMUSG00000031673.5	-0.741684531	2.22346756	7.437577757	0.00638758	0.115645623	Cdh11	protein_coding	1.382813674	1.293313181	1.156107111	1.096629855
ENSMUSG00000031778.6	-0.751064928	2.523892496	8.065894356	0.004510621	0.094617265	Cx3cl1	protein_coding	1.647673407	1.788257858	1.206141445	1.638769604
ENSMUSG00000020473.7	-0.761498892	2.965010103	7.072663799	0.007826881	0.130947414	Aebp1	protein_coding	1.802710102	2.684800156	1.431008127	2.234100785
ENSMUSG00000009281.4	-0.762440594	3.466174243	8.032501055	0.004594535	0.095859262	Rarres2	protein_coding	19.59126461	16.61132117	15.15317522	14.87107471
ENSMUSG00000018899.9	-0.763602436	4.170390126	9.479958066	0.002077287	0.06291913	Irf1	protein_coding	5.436505826	5.523465959	3.89830256	5.108143236
ENSMUSG00000053279.6	-0.765252528	2.037116147	8.424703196	0.003701571	0.085261134	Aldh1a1	protein_coding	2.101492222	2.500858831	1.673782099	2.085581576
ENSMUSG00000044951.7	-0.766603842	4.515370192	8.114006377	0.004392454	0.092778393	Mylk4	protein_coding	2.870622513	4.107618849	3.744645742	2.061855082
ENSMUSG00000039031.8	-0.766900056	3.174851904	8.440968592	0.003668608	0.084919619	Arhgap18	protein_coding	2.759385813	2.623565624	1.838932228	2.570778522
ENSMUSG00000028214.7	-0.767088613	2.007901717	9.673581498	0.001869365	0.059475543	Gem	protein_coding	2.371402921	2.039936915	1.772723372	1.876813657
ENSMUSG00000039735.8	-0.769975833	2.57754686	7.190634	0.007328508	0.125723356	Fnbp1l	protein_coding	1.38296874	1.291880114	0.798123041	1.385693345
ENSMUSG00000078619.4	-0.774066367	2.45084015	7.005603313	0.008125499	0.133566261	Smarcd2	protein_coding	1.599790317	1.943049421	1.039660899	1.827174321
ENSMUSG00000037321.9	-0.782499838	2.39798422	6.981502672	0.008235643	0.1343859	Tap1	protein_coding	1.299691065	1.105184113	0.712518236	1.231973023
ENSMUSG00000035954.8	-0.782788392	3.158786773	12.06224916	0.000514532	0.026706482	Dock4	protein_coding	1.351877803	1.223007231	1.044743466	1.057697058
ENSMUSG00000069874.5	-0.783722423	3.499062879	13.08852005	0.000297111	0.018032144	Irgm2	protein_coding	4.201457055	3.629764452	3.643783876	2.791187324
ENSMUSG00000057054.4	-0.784713004	1.374041479	7.699213283	0.00552449	0.10581416	Inca1	protein_coding	2.101687967	1.708037258	1.566848894	1.553903
ENSMUSG00000016918.8	-0.787450174	3.841332417	7.389651209	0.006560021	0.117925292	Sulf1	protein_coding	3.789435978	3.555906215	2.138200622	3.762475266
ENSMUSG00000020889.10	-0.78882434	5.69575331	10.13105751	0.001457917	0.051273251	Nr1d1	protein_coding	15.94242661	21.14518864	16.41418316	13.73426326
ENSMUSG00000020092.8	-0.800408376	3.206902192	7.481775633	0.006232658	0.113878162	X99384	protein_coding	2.813633531	2.39142841	1.553867364	2.602210518
ENSMUSG00000034422.8	-0.801406686	3.903374397	11.61583816	0.000653926	0.031273273	Parp14	protein_coding	1.944982131	1.703068327	1.309976683	1.615633521
ENSMUSG00000029761.9	-0.806788647	4.087074814	7.04478671	0.007949629	0.132407028	Cald1	protein_coding	2.539598083	2.383478234	1.375485961	2.521852733
ENSMUSG00000030804.7	-0.812608056	1.190421287	8.647290134	0.003275482	0.080290661	Vkorc1	protein_coding	0.951442676	1.156738806	0.842900217	0.84098378
ENSMUSG00000023259.9	-0.81524652	1.900326195	9.966116542	0.001594475	0.054006166	Slc26a6	protein_coding	2.050169615	2.149134969	1.846096964	1.508556071
ENSMUSG00000039706.6	-0.816008126	1.215865494	7.680896469	0.005580844	0.105863938	Ldb2	protein_coding	1.021689984	1.020368955	0.635159183	0.97771314
ENSMUSG00000030022.8	-0.817927076	3.873580274	13.48419311	0.000240582	0.016261176	Adamts9	protein_coding	1.465566303	1.483599121	1.034268193	1.303047702
ENSMUSG00000056941.9	-0.819935087	2.42132852	9.663748604	0.001879397	0.059669886	Commd7	protein_coding	1.064856514	1.01317513	0.782138974	0.869045133
ENSMUSG00000016496.7	-0.829992365	1.958009959	7.179963142	0.007372222	0.125832498	Cd274	protein_coding	1.464472454	1.117257818	0.787117446	1.242310464
ENSMUSG00000020707.5	-0.839699099	1.355902331	7.187296367	0.007342153	0.125742631	Rnf135	protein_coding	1.11906513	1.323422751	0.779513543	1.126079399
ENSMUSG00000022443.9	-0.840607848	6.083024577	9.107549473	0.002545567	0.06964089	Myh9	protein_coding	7.066324411	6.291721576	3.872465046	6.480635955
ENSMUSG00000050721.8	-0.841752421	2.616742509	8.575917195	0.003406383	0.081968791	Plekho2	protein_coding	2.670122146	2.157818252	1.461429252	2.304537477
ENSMUSG00000039765.9	-0.846024397	2.984676655	9.281998513	0.002314168	0.066781532	Cc2d2a	protein_coding	1.042220074	1.496738976	1.23476982	0.754433953
ENSMUSG00000031517.6	-0.848739175	2.37229792	9.034099049	0.002649896	0.071326764	Gpm6a	protein_coding	2.021823825	1.504699489	1.472340548	1.289483704
ENSMUSG00000002032.9	-0.856670312	2.474095488	9.970270555	0.001590881	0.054006166	Tmem25	protein_coding	1.669676749	2.286746318	2.011118015	1.075009041
ENSMUSG00000022340.7	-0.866230843	1.941147159	11.83903479	0.000580019	0.029017848	Sybu	protein_coding	1.077516363	0.836977039	0.801282987	0.679641096
ENSMUSG00000030123.8	-0.873598393	5.489738942	8.658327113	0.003255701	0.080208138	Plxnd1	protein_coding	8.507795012	7.812562767	4.673664252	7.690590156
ENSMUSG00000035606.6	-0.878081496	3.010866056	6.671399008	0.009797225	0.149701634	Ky	protein_coding	1.361642984	1.869334392	1.5237475	0.959189515
ENSMUSG00000034353.7	-0.885285728	1.402432043	8.982164627	0.002726275	0.072627271	Ramp1	protein_coding	0.753396272	1.227989302	0.681957062	0.809561736
ENSMUSG00000001663.4	-0.885775723	2.645689627	13.02383921	0.000307551	0.01834208	Gstt1	protein_coding	4.272336708	4.728721714	3.135063408	3.675422634
ENSMUSG00000031502.9	-0.901112124	7.444263695	9.696112396	0.001846583	0.05898549	Col4a1	protein_coding	32.82895002	27.39185471	19.09289128	25.92129865
ENSMUSG00000022602.7	-0.901709051	3.638415952	10.49495009	0.001197012	0.046273482	Arc	protein_coding	3.344498506	5.14081024	3.984834114	2.41216031
ENSMUSG00000035929.10	-0.905567186	3.775919584	10.09375986	0.001487722	0.051923937	H2-Q4	protein_coding	7.425408859	6.137398	3.831619311	6.259878584
ENSMUSG00000054072.5	-0.905668219	4.790268256	14.65454622	0.000129123	0.010611824	Iigp1	protein_coding	10.75032269	9.895270256	9.603166846	6.051917458
ENSMUSG00000026222.9	-0.916806225	2.704928311	7.782563088	0.00527529	0.104055267	Sp100	protein_coding	1.073557618	0.995988602	0.494083967	1.020036136
ENSMUSG00000026185.8	-0.916808753	5.527013375	10.88355776	0.000970217	0.040049902	Igfbp5	protein_coding	8.0343308	10.79713389	7.089322893	6.865454401
ENSMUSG00000031883.6	-0.918490107	1.040468541	7.977058555	0.004737385	0.096576618	Car7	protein_coding	1.139140613	0.892434755	0.536030688	0.980838138
ENSMUSG00000049047.5	-0.926697008	1.971924712	11.00066337	0.000910793	0.038624353	Armcx3	protein_coding	1.310412852	1.529116755	0.804930571	1.270424986
ENSMUSG00000031613.8	-0.92757841	1.178808926	9.219927387	0.00239395	0.068050837	Hpgd	protein_coding	1.831869043	1.4722596	1.073939988	1.380642009
ENSMUSG00000018920.5	-0.9276916	1.797399457	7.031474138	0.00800894	0.132627193	Cxcl16	protein_coding	1.364647258	1.389958497	0.624332039	1.371941446
ENSMUSG00000036862.8	-0.927869895	2.815319927	7.053418439	0.007911413	0.132071093	Dchs1	protein_coding	1.015486174	0.665063557	0.483316961	0.748670309
ENSMUSG00000032193.7	-0.931423679	2.013881185	13.05168599	0.000303012	0.018214226	Ldlr	protein_coding	1.04974989	1.06066935	0.642759824	0.902695177
ENSMUSG00000021256.4	-0.937219999	2.627974364	7.471200582	0.006269373	0.114185178	Vash1	protein_coding	1.907286078	1.393176785	0.928953749	1.472908034
ENSMUSG00000064368.1	-0.937410299	7.712584624	14.41183331	0.000146876	0.011375343	mt-Nd6	protein_coding	503.0119933	492.212607	328.9103617	397.0612697
ENSMUSG00000060802.8	-0.942420379	6.130715731	13.43924337	0.000246415	0.016581766	B2m	protein_coding	118.8193957	97.80770405	63.15789929	93.8836566
ENSMUSG00000035385.5	-0.947116814	0.560994984	6.898383066	0.008627374	0.137865174	Ccl2	protein_coding	1.241050445	1.443528928	0.73216633	1.213733409
ENSMUSG00000042284.8	-0.948142171	4.563979991	9.308087081	0.002281446	0.066467864	Itga1	protein_coding	3.959729366	3.367825018	1.823306827	3.439774907
ENSMUSG00000032119.4	-0.955719162	1.377028608	12.44338253	0.000419475	0.023197752	Hinfp	protein_coding	1.48678837	1.583763299	1.235777288	0.980145727
ENSMUSG00000031111.9	-0.960578197	3.768872672	7.931286737	0.004858723	0.098129433	Igsf1	protein_coding	2.363047695	2.457094267	2.216594623	1.302404828
ENSMUSG00000021388.6	-0.976080967	1.98664908	7.300777981	0.006892476	0.121180088	Aspn	protein_coding	1.91978139	1.649564407	0.880010461	1.651258866
ENSMUSG00000029298.8	-0.985590476	3.315071084	9.8078665	0.00173767	0.056953624	Gbp9	protein_coding	4.15455898	2.699712321	1.909603159	2.93662784
ENSMUSG00000059588.7	-0.987237308	3.651637129	9.425832754	0.002139499	0.064088596	Calcrl	protein_coding	3.299390961	3.451144071	1.547358076	3.149278659
ENSMUSG00000041859.9	-0.9891376	1.048155813	9.321753531	0.002264492	0.066227675	Mcm3	protein_coding	0.851360299	1.194689263	0.500463532	0.913990581
ENSMUSG00000088246.1	-0.99624549	2.334070903	8.82200277	0.002976198	0.076327191	mmu-mir-2134-1	miRNA	88.93197102	109.8753951	52.53100741	85.23498036
ENSMUSG00000027435.8	-0.99931671	5.657716892	7.756247855	0.005352705	0.104392973	Cd93	protein_coding	11.51746417	8.234502538	4.30872308	9.354306377
ENSMUSG00000064341.1	-1.004337173	14.75349158	6.893144948	0.008652691	0.137935134	mt-Nd1	protein_coding	34560.59899	33742.78732	19851.15266	27545.36472
ENSMUSG00000040296.8	-1.00688224	2.628181227	9.744213365	0.001798881	0.058083613	Ddx58	protein_coding	1.215204232	1.014843474	0.535370051	1.008386996
ENSMUSG00000039304.5	-1.009443292	2.388696008	8.723833117	0.00314077	0.078431581	Tnfsf10	protein_coding	1.236216059	1.183527027	0.515988983	1.145880371
ENSMUSG00000038530.5	-1.021704845	2.734976701	8.396308279	0.003759838	0.085470281	Rgs4	protein_coding	3.022280281	2.277077114	1.301673314	2.33004535
ENSMUSG00000032596.7	-1.024228869	3.390673002	11.7881559	0.000596088	0.029337538	Uba7	protein_coding	4.699169546	3.557868933	2.215968953	3.449040952
ENSMUSG00000030579.9	-1.031341704	1.066562367	7.755746773	0.00535419	0.104392973	Tyrobp	protein_coding	4.375007519	5.758430377	2.192707525	4.651207569
ENSMUSG00000064357.1	-1.032806118	13.76009995	7.212824263	0.00723845	0.124801656	mt-Atp6	protein_coding	23479.60589	24131.76934	13286.28917	19056.65405
ENSMUSG00000004837.2	-1.035629959	1.219221769	10.88700709	0.000968412	0.040049902	Grap	protein_coding	1.835489839	1.478443605	0.808395469	1.432921496
ENSMUSG00000023915.4	-1.036630379	1.666157338	11.87344017	0.000569401	0.028673696	Tnfrsf21	protein_coding	1.44655351	0.822105527	0.773937494	0.794415818
ENSMUSG00000041187.9	-1.038235368	2.202576028	7.172511265	0.007402907	0.126132867	Prkd2	protein_coding	1.85479377	1.468233973	0.612977409	1.623649593
ENSMUSG00000031875.6	-1.04010281	1.153225271	9.157448136	0.002477078	0.068865643	Cmtm3	protein_coding	1.946716202	1.903863888	0.896711796	1.687279942
ENSMUSG00000031799.9	-1.041137952	4.740622534	9.183044788	0.002442673	0.068287087	Tpm4	protein_coding	18.14977113	15.61286266	7.70167459	14.9928241
ENSMUSG00000050666.7	-1.04204153	1.828830511	17.52568319	2.83453E-05	0.003513204	E130203B14Rik	protein_coding	1.673898725	1.62227056	1.025120281	1.225216643
ENSMUSG00000018593.6	-1.046730296	5.694157672	7.401551847	0.006516763	0.117425283	Sparc	protein_coding	19.61851529	18.08304303	8.410907502	16.79275246
ENSMUSG00000090378.1	-1.050192871	13.86070369	7.619232636	0.005774906	0.10802554	Gm10925	protein_coding	22084.49878	23094.85364	12684.13478	17655.04994
ENSMUSG00000020641.8	-1.062834377	2.847488844	8.1162404	0.004387044	0.092778393	Rsad2	protein_coding	2.351054218	1.827677915	0.871463472	1.896763491
ENSMUSG00000020658.8	-1.063367432	2.941627797	10.09265631	0.001488614	0.051923937	Efr3b	protein_coding	1.578849596	1.582614089	0.670996927	1.41901669
ENSMUSG00000064356.3	-1.063540559	9.801373807	8.010284377	0.004651243	0.096022356	mt-Atp8	protein_coding	4867.021803	5079.761704	2835.50992	3789.617018
ENSMUSG00000018381.8	-1.068074673	1.75203529	6.775876706	0.009239809	0.144122073	Abi3	protein_coding	0.936637236	1.325423305	0.369460907	1.101938983
ENSMUSG00000042985.6	-1.071601183	3.129106998	11.69827711	0.00062558	0.030107025	Upk3b	protein_coding	4.40188665	4.204740671	3.386079894	2.407430584
ENSMUSG00000020674.9	-1.077164178	4.730143447	28.88749942	7.67064E-08	3.333E-05	Pxdn	protein_coding	3.591210059	3.390523047	2.287004044	2.361003509
ENSMUSG00000041633.8	-1.077186689	2.319552608	9.558501259	0.001990255	0.061645221	Kctd12b	protein_coding	1.725270208	1.040536817	0.741055411	1.100759057
ENSMUSG00000055413.9	-1.079925668	1.384105855	13.19618945	0.000280519	0.017775548	H2-Q8	processed_transcript	2.725963803	2.580129854	1.284376709	2.215328433
ENSMUSG00000065947.3	-1.082001221	8.936187479	6.636907584	0.009988718	0.151756661	mt-Nd4l	protein_coding	1717.286611	1964.761358	1036.126796	1382.261465
ENSMUSG00000040253.9	-1.08840621	3.213601422	11.18941356	0.000822653	0.036297232	Gbp7	protein_coding	2.710528879	1.972987862	1.050746554	2.01201808
ENSMUSG00000030930.7	-1.091095026	2.166928077	7.723620122	0.0054503	0.105533479	Chst15	protein_coding	1.06999287	1.095446053	0.374430758	1.0255122
ENSMUSG00000067736.1	-1.098365845	9.626701065	6.831842492	0.008954685	0.141415207	Gm10222	protein_coding	2776.314042	3183.670538	1678.123145	2194.103842
ENSMUSG00000018474.10	-1.09933649	3.472877907	19.6900231	9.10756E-06	0.001680815	Chd3	protein_coding	1.369612466	2.22421553	1.096474613	1.229903348
ENSMUSG00000074151.5	-1.103285538	2.028914184	13.41493665	0.000249629	0.016724016	Nlrc5	lincRNA	1.039764464	0.712067194	0.543424215	0.608574302
ENSMUSG00000075010.3	-1.107048743	1.390906984	7.31658669	0.006832105	0.121090678	AW112010	protein_coding	5.11255361	3.899337977	1.533006053	4.240892929
ENSMUSG00000034738.8	-1.113607197	0.986557557	7.720006116	0.005461221	0.105533479	Nostrin	protein_coding	1.659929323	1.346425446	0.561228712	1.367858287
ENSMUSG00000035686.7	-1.114009479	3.610121266	10.95279428	0.000934626	0.039048864	Thrsp	protein_coding	9.049110131	11.78976306	5.905446585	7.477196168
ENSMUSG00000026971.9	-1.115796017	4.132535032	8.284819876	0.003997787	0.088369687	Itgb6	protein_coding	2.929553261	3.520257197	2.79039338	1.444439832
ENSMUSG00000020150.7	-1.119270769	0.662400127	8.450448489	0.003649534	0.084736058	Gamt	protein_coding	1.340564155	1.119249854	0.791496403	0.794461225
ENSMUSG00000060550.8	-1.120950823	3.343872626	16.74037877	4.2859E-05	0.004689257	H2-Q7	protein_coding	3.925926469	3.344854636	1.90195639	2.766299032
ENSMUSG00000064351.1	-1.122521693	17.53400904	9.128578387	0.002516472	0.069282626	mt-Co1	protein_coding	157484.675	151642.2188	88948.8768	109339.3397
ENSMUSG00000064345.1	-1.131931677	13.46448889	7.9581634	0.004787097	0.097069552	mt-Nd2	protein_coding	11786.68699	13476.70069	6507.234219	9485.407353
ENSMUSG00000055116.6	-1.132096085	2.378313781	12.35254673	0.000440385	0.02377815	Arntl	protein_coding	2.348136935	2.279659294	1.266243292	1.682126554
ENSMUSG00000020486.11	-1.141101327	2.919015514	15.84957136	6.85821E-05	0.006643287	38231	protein_coding	2.917734923	2.437959967	1.368765686	2.019652393
ENSMUSG00000001493.9	-1.142400375	1.617893135	8.785855699	0.003035751	0.077074634	Meox1	protein_coding	1.590548008	2.22468052	0.786981384	1.593478058
ENSMUSG00000020241.7	-1.144883667	3.3846339	8.531991649	0.003489576	0.083391086	Col6a2	protein_coding	1.494609939	1.822713103	0.870557252	1.215493019
ENSMUSG00000054435.8	-1.146522028	2.582761272	8.466906421	0.00361666	0.084431621	Gimap4	protein_coding	5.234141701	4.56505977	1.621327389	4.462972919
ENSMUSG00000026938.9	-1.165265126	0.510110624	8.891869398	0.002864433	0.075367298	Fcna	protein_coding	0.980630231	1.761715534	0.66663715	1.028423112
ENSMUSG00000073409.5	-1.171747702	3.44217552	14.19428438	0.000164871	0.012263364	H2-Q6	protein_coding	9.43959808	6.627954673	3.833935898	6.115429448
ENSMUSG00000025969.9	-1.173984929	4.072737762	10.14796641	0.001444605	0.051091989	Nrp2	protein_coding	2.937537974	2.255730473	1.000880537	2.183269583
ENSMUSG00000064358.1	-1.176281444	16.25490951	9.418544502	0.00214802	0.064088596	mt-Co3	protein_coding	130029.6824	120596.6851	65723.13339	88858.74083
ENSMUSG00000041797.7	-1.178502234	2.458590539	7.723173448	0.005451649	0.105533479	Abca9	protein_coding	0.829861033	1.122337516	0.344347345	0.836188559
ENSMUSG00000078437.1	-1.188219643	-1.079161089	6.648123036	0.009926034	0.151106224	Gm3055	protein_coding	0.828826164	1.083068394	0.480393301	0.702504997
ENSMUSG00000064354.1	-1.200643609	15.59077689	10.2971502	0.001332358	0.049859685	mt-Co2	protein_coding	94706.28001	88004.59978	46210.94269	64501.99637
ENSMUSG00000040264.7	-1.212932147	1.532117537	16.19787534	5.70581E-05	0.005742495	Gbp5	protein_coding	1.046258483	0.922750616	0.425219861	0.755507481
ENSMUSG00000038543.7	-1.218123223	0.217558691	11.34347413	0.000757136	0.034474602	BC028528	protein_coding	1.009909245	1.392209582	0.50172882	0.931241057
ENSMUSG00000064360.1	-1.221973397	12.81125881	8.933978658	0.002799139	0.074033587	mt-Nd3	protein_coding	27083.01139	24183.35122	12273.63523	18300.53423
ENSMUSG00000045868.5	-1.228745515	4.891826872	12.79371988	0.000347785	0.020187452	Gvin1	protein_coding	5.829898013	3.89380666	1.95021266	3.808473818
ENSMUSG00000015396.2	-1.229485983	0.925977114	11.97430963	0.00053939	0.027713008	Cd83	protein_coding	1.545502682	1.332149511	0.627048731	1.093306964
ENSMUSG00000064367.1	-1.242916568	13.04931062	8.340877938	0.003876286	0.086311216	mt-Nd5	protein_coding	4937.218022	5941.049723	2832.270402	3563.770409
ENSMUSG00000064363.1	-1.251849862	13.56269169	9.207932591	0.002409687	0.068116199	mt-Nd4	protein_coding	10398.70379	11038.04988	5457.801272	7079.762708
ENSMUSG00000004730.7	-1.260665963	1.8141245	10.24801817	0.001368315	0.050232117	Emr1	protein_coding	1.312286663	1.884428887	0.516128421	1.307847377
ENSMUSG00000000317.5	-1.279822553	2.894936533	14.53876004	0.000137305	0.010819376	Bcl6b	protein_coding	3.714781634	2.463784104	1.321534778	2.229867094
ENSMUSG00000052384.7	-1.28782065	1.498020534	18.68343845	1.54317E-05	0.002394748	Lrrc33	protein_coding	0.993330998	1.106658084	0.472287887	0.727250668
ENSMUSG00000064370.1	-1.296866589	15.0930764	10.83610257	0.0009954	0.040584578	mt-Cytb	protein_coding	37660.248	38336.94686	17916.07617	25105.727
ENSMUSG00000062417.5	-1.299397621	-0.528918958	7.327177325	0.006791963	0.120797392	Hist1h3g	protein_coding	0.761454661	2.870280862	1.075776774	0.893632937
ENSMUSG00000024621.8	-1.299604009	3.277922236	9.268248673	0.002331605	0.067030319	Csf1r	protein_coding	2.398596809	2.916593499	0.79042046	2.164190383
ENSMUSG00000037206.7	-1.306921018	1.944139411	6.982441003	0.008231326	0.1343859	Islr	protein_coding	1.946692035	3.465491923	0.671348012	2.292226931
ENSMUSG00000027533.9	-1.324568369	2.945833387	13.61762305	0.000224072	0.0154895	Fabp5	protein_coding	3.559186465	2.904724232	1.092861071	2.475267147
ENSMUSG00000041046.7	-1.326030678	0.221499127	11.18768922	0.000823418	0.036297232	Ramp3	protein_coding	1.21277782	0.772430962	0.318138369	0.801628577
ENSMUSG00000020676.2	-1.326462708	-0.376860138	8.853310791	0.002925577	0.07579588	Ccl11	protein_coding	0.559976157	1.435353241	0.446278253	0.620670451
ENSMUSG00000037949.6	-1.336648328	5.12991411	22.3933543	2.22141E-06	0.000553824	Ano10	protein_coding	13.7234304	16.73857768	8.748502376	8.157788103
ENSMUSG00000078606.1	-1.340918109	4.87020279	17.58043767	2.75407E-05	0.003461478	Gm4070	protein_coding	5.650966991	4.137598787	1.885865542	3.478851523
ENSMUSG00000004098.7	-1.349291594	2.382970984	12.97295088	0.000316024	0.018759364	Col5a3	protein_coding	1.037024964	1.040478941	0.435031333	0.695331344
ENSMUSG00000050821.7	-1.36870738	3.610174492	19.45916769	1.02773E-05	0.001796526	Fam131a	protein_coding	5.198194605	6.585867003	3.554382751	2.866300162
ENSMUSG00000040710.4	-1.373249241	2.385652458	13.58418195	0.000228099	0.015696548	St8sia4	protein_coding	1.527487065	1.162798243	0.437272537	1.005626336
ENSMUSG00000050936.3	-1.382696595	0.54205097	12.71828161	0.000362098	0.020780345	Hist2h2bb	protein_coding	1.182154217	1.448949734	0.522177012	0.887612216
ENSMUSG00000029343.10	-1.389933128	-0.375075487	10.5914052	0.001136146	0.044532235	Crybb1	protein_coding	1.278760368	0.797532181	0.486398217	0.636675857
ENSMUSG00000021223.7	-1.391173192	2.179055032	9.893559968	0.001658582	0.055681487	Papln	protein_coding	1.415778549	1.034089171	0.476078839	0.82173922
ENSMUSG00000090942.1	-1.39624523	2.859021653	8.42263325	0.003705787	0.085261134	F830016B08Rik	protein_coding	3.099878129	2.949202696	2.245255501	1.040153482
ENSMUSG00000042834.8	-1.454204142	2.083192601	13.40160974	0.000251408	0.016769385	D0H4S114	protein_coding	2.581229809	2.215815625	1.448721961	1.020985133
ENSMUSG00000069755.3	-1.461715527	-1.063487541	6.753608381	0.009355829	0.145335486	Zfp125	protein_coding	0.744564724	1.010381307	0.566415668	0.291270378
ENSMUSG00000087523.1	-1.464259515	0.490854215	17.58914534	2.74149E-05	0.003461478	Gm12319	processed_transcript	4.214506	6.159056758	3.206117823	1.997458411
ENSMUSG00000063021.2	-1.515803658	-1.618091314	7.123307337	0.007608821	0.128287092	Hist1h2ak	protein_coding	1.123910479	0.77105162	0.085499687	0.846362315
ENSMUSG00000018008.6	-1.528513999	0.913210132	12.32728609	0.000446385	0.023940731	Cyth4	protein_coding	0.890713215	1.257116891	0.252128665	0.765764293
ENSMUSG00000075031.2	-1.531598169	-0.691310273	11.54516788	0.000679256	0.031913791	Hist1h2bb	protein_coding	1.59845046	2.206191093	0.935381186	0.92593484
ENSMUSG00000037169.8	-1.56529324	0.423042591	10.67305407	0.001087075	0.043152949	Mycn	protein_coding	1.085079509	0.397142815	0.266276396	0.443305897
ENSMUSG00000021822.2	-1.565563854	0.654130943	10.69624729	0.001073531	0.042738888	Plau	protein_coding	1.110415842	1.145946095	0.168946207	0.878432491
ENSMUSG00000037010.7	-1.587763202	2.265766655	22.1453456	2.52768E-06	0.000591399	Apln	protein_coding	2.77112168	1.998120567	1.05752187	1.177071187
ENSMUSG00000028339.11	-1.592345182	3.732280668	12.46057488	0.000415632	0.023071386	Col15a1	protein_coding	3.218203448	3.488199552	0.916771508	2.137530855
ENSMUSG00000028268.8	-1.595748697	2.282392313	22.88008243	1.72429E-06	0.000475406	Gbp3	protein_coding	2.587259349	1.958590659	0.69226909	1.40475865
ENSMUSG00000032224.8	-1.598105971	2.207984624	23.13787788	1.50791E-06	0.000432684	Fam81a	protein_coding	1.725042744	1.685205447	0.915557157	0.681106457
ENSMUSG00000079363.2	-1.626967682	2.999417193	27.0999672	1.93201E-07	7.73212E-05	Gbp4	protein_coding	3.298591604	2.341127117	0.947654577	1.601182821
ENSMUSG00000024440.6	-1.639294826	3.32033348	16.04207433	6.19504E-05	0.006157788	Pcdh12	protein_coding	3.261411115	2.413846271	0.798857222	1.721211677
ENSMUSG00000078922.3	-1.688620725	1.993342587	18.36872383	1.82021E-05	0.002669789	Tgtp1	protein_coding	2.534749932	1.916354091	0.533351372	1.378370412
ENSMUSG00000026697.9	-1.756511113	0.153334559	22.29988109	2.33221E-06	0.000562988	Myoc	protein_coding	0.651391661	1.140978121	0.253039535	0.474401718
ENSMUSG00000050014.6	-1.884996154	1.173777226	25.0973698	5.45072E-07	0.000182487	Apol10b	protein_coding	2.424289648	1.470881365	0.507994101	0.973926142
ENSMUSG00000078921.3	-1.950225762	2.58417605	29.26080369	6.32625E-08	2.91544E-05	Tgtp2	protein_coding	4.548639945	2.783262943	0.879991322	1.758315415
ENSMUSG00000049539.1	-1.979784918	-0.674002453	16.186731	5.73947E-05	0.005742495	Hist1h1a	protein_coding	1.774151448	1.506166416	0.1173615	1.056147953
ENSMUSG00000037145.8	-2.055169194	0.593630039	13.21200376	0.000278162	0.017699937	2210407C18Rik	protein_coding	0.908810312	1.918410835	0.471383771	0.452483201
ENSMUSG00000079547.2	-2.233914489	-0.656188221	25.74396917	3.89843E-07	0.000137878	H2-DMb1	protein_coding	0.645465379	1.032208413	0.119036953	0.374928933
ENSMUSG00000032315.5	-2.464691689	0.441700267	10.72101673	0.001059255	0.042392481	Cyp1a1	protein_coding	0.330460662	1.697421685	0.067038039	0.422297443
ENSMUSG00000033578.7	-2.466039217	0.372624396	22.34129706	2.28245E-06	0.000559863	Tmem35	protein_coding	0.495553013	1.632494711	0.2970177	0.2261678
ENSMUSG00000062727.3	-2.484134097	-1.874095066	13.78484363	0.000204983	0.014635612	Hist1h2bk	protein_coding	0.662119646	1.207079202	0.091581254	0.32965957
ENSMUSG00000024610.8	-2.486774327	4.082648771	44.47050746	2.58218E-11	3.78126E-08	Cd74	protein_coding	24.52098307	25.83736277	3.99950568	8.379376844
ENSMUSG00000044338.7	-2.558416822	3.246959249	26.44285114	2.71451E-07	0.000103206	Aplnr	protein_coding	6.155066396	4.109255887	0.909436306	1.526225709
ENSMUSG00000073421.4	-2.725960057	2.598998399	84.72512738	3.42865E-20	5.21429E-16	H2-Ab1	protein_coding	7.698340515	8.978561157	1.256850615	2.238040095
ENSMUSG00000060586.8	-2.806425296	2.839674624	44.30919536	2.80396E-11	3.78126E-08	H2-Eb1	protein_coding	12.6334384	13.0770676	1.481415889	3.566152365
ENSMUSG00000036594.7	-2.880659817	3.167169869	49.30332239	2.19291E-12	3.70553E-09	H2-Aa	protein_coding	9.22220255	10.25558027	1.172962333	2.489529743
ENSMUSG00000058773.2	-3.195106688	-0.825548353	38.76001374	4.79245E-10	4.55523E-07	Hist1h1b	protein_coding	1.163292787	1.882625727	0.235988353	0.212368295
ENSMUSG00000061100.3	-4.034559898	-1.173514966	43.70556666	3.81685E-11	4.34306E-08	Retnla	protein_coding	1.550012567	1.942706595	0.294786798	0
ENSMUSG00000065453.1	-6.122775938	-2.293490376	19.34990208	1.08825E-05	0.001880691	Mirlet7d	miRNA	1.410397464	3.870376762	0	0
ENSMUSG00000052305.5	-8.933597789	3.9133025	68.97628913	9.96544E-17	3.03109E-13	Hbb-b1	protein_coding	25.62724993	30.26163813	0.050902139	0.091614695
ENSMUSG00000073940.3	-9.091358718	2.680132826	61.9411887	3.5387E-15	6.72706E-12	Hbb-b2	protein_coding	15.33142341	13.9690829	0	0.056277598
ENSMUSG00000069919.6	-9.232810814	3.630948157	62.18597976	3.12505E-15	6.72706E-12	Hba-a1	protein_coding	24.53986985	25.67542511	0.05411105	0.048695079
ENSMUSG00000069917.6	-9.862682689	3.463082483	63.73020397	1.4268E-15	3.61647E-12	Hba-a2	protein_coding	25.96822965	25.9057694	0.065630944	0
