# Supplementary material for: 8-Oxoguanine DNA Glycosylase (OGG1) Deficiency Exacerbates Doxorubicin-Induced Cardiac Dysfunction
Source: Oxid Med Cell Longev. 2022 Mar 27;2022:9180267. doi: 10.1155/2022/9180267 (PMC8981022; doi:10.1155/2022/9180267)
Supplement: Supplementary 7 — Supplementary Table 7: differentially expressed genes between WT doxorubicin-treated and WT saline-treated CMs. [file 9180267.f7.txt]

	logFC	logCPM	LR	PValue	FDR	hgnc	biotype	WT_Saline3	WT_Saline1	WT_DXB3	WT_DXB1
ENSMUSG00000050359.6	5.490216769	0.348035568	50.38123355	1.26599E-12	1.92532E-08	Sprr1a	protein_coding	0.108569306	0.033948343	8.221395631	1.425905815
ENSMUSG00000028364.8	5.328418544	1.694323527	44.99555498	1.97482E-11	1.50165E-07	Tnc	protein_coding	0.029017588	0.029035066	2.873701154	0.40086641
ENSMUSG00000029304.8	4.190449536	-0.259886604	34.30287194	4.71685E-09	6.10819E-06	Spp1	protein_coding	0.105921274	0.033120335	2.75895304	0.489470831
ENSMUSG00000032315.5	3.951838702	0.441700267	20.28743573	6.66367E-06	0.002252026	Cyp1a1	protein_coding	0.033252467	0.04159062	1.16079788	0.388199643
ENSMUSG00000001131.5	3.279245956	1.507352709	20.96172738	4.68551E-06	0.00178143	Timp1	protein_coding	1.280182291	0.400297926	18.08730838	2.347170065
ENSMUSG00000092696.1	2.842580101	-2.506838608	7.120745868	0.0076197	0.20841798	AC123610.1	miRNA	0	0.357350982	2.455064018	2.223634799
ENSMUSG00000090137.1	2.424195867	0.229966741	13.46338735	0.000243264	0.029361599	Uba52	protein_coding	0.31974896	0.036356994	0.499557872	1.725028602
ENSMUSG00000062380.3	2.364797962	-0.250712546	16.2979337	5.41229E-05	0.011592981	Tubb3	protein_coding	0.209683209	0.101990731	1.776760386	0.33998708
ENSMUSG00000090650.1	2.285343007	-1.230266772	16.22704092	5.61864E-05	0.01186781	Gm11168	protein_coding	0.195034681	0.162626794	1.466422969	0.632470976
ENSMUSG00000019997.4	2.274284591	6.630597532	42.5296384	6.96192E-11	3.52923E-07	Ctgf	protein_coding	22.84934063	10.07252536	139.3945057	57.22147585
ENSMUSG00000021091.8	2.254504537	4.149113587	10.67492323	0.001085977	0.072869432	Serpina3n	protein_coding	8.057013079	1.701539112	47.57506281	7.038090327
ENSMUSG00000031574.6	2.180134025	1.088442945	20.8786767	4.89311E-06	0.001814987	Star	protein_coding	0.374043346	0.137124286	2.230484357	0.63994717
ENSMUSG00000031972.3	2.139806663	7.600099446	21.42523752	3.67897E-06	0.001554159	Acta1	protein_coding	54.89577965	63.2632922	541.4397162	178.5676095
ENSMUSG00000001506.9	2.019803735	3.604002335	12.32950387	0.000445855	0.041598535	Col1a1	protein_coding	0.673659953	0.821726142	6.949290409	1.505418859
ENSMUSG00000056271.7	1.998745124	-0.317575467	17.94822409	2.26996E-05	0.005659274	Lman1l	protein_coding	0.155841109	0.194918718	1.422821192	0.480102968
ENSMUSG00000087580.2	1.89523189	4.153790975	22.5624099	2.03426E-06	0.000966783	Gm16869	lincRNA	2.118819972	2.296096517	12.45636392	9.582747953
ENSMUSG00000027750.9	1.884517258	3.719775068	11.53525056	0.000682889	0.055536748	Postn	protein_coding	0.922339036	0.79571859	7.245202999	1.308120881
ENSMUSG00000026043.11	1.870689538	6.109063504	12.62482292	0.000380658	0.037836902	Col3a1	protein_coding	2.8629087	4.088612655	28.95610146	7.185834568
ENSMUSG00000039239.8	1.793657949	2.448155299	27.31610876	1.72766E-07	0.000119428	Tgfb2	protein_coding	0.692039449	0.472129278	3.687676872	1.512642298
ENSMUSG00000024529.6	1.71801064	1.568211863	8.172111451	0.004253936	0.15257985	Lox	protein_coding	0.528024781	0.185383445	2.278580107	0.594803336
ENSMUSG00000034855.7	1.710841007	-0.030647593	16.95143553	3.83483E-05	0.008704494	Cxcl10	protein_coding	0.315108803	0.197061624	1.353847968	0.72458812
ENSMUSG00000038550.4	1.700159012	2.354971089	35.18053839	3.00512E-09	5.71273E-06	Gm129	protein_coding	1.694740384	0.758756764	6.329819158	3.559787859
ENSMUSG00000034459.8	1.665912765	1.909741288	17.50575094	2.8644E-05	0.006806529	Ifit1	protein_coding	0.621798586	0.521888624	3.374556721	1.384954153
ENSMUSG00000038451.7	1.648389848	0.07463239	21.77173671	3.07091E-06	0.001415223	Spsb2	protein_coding	0.41984505	0.131280603	1.211956074	0.944540945
ENSMUSG00000049303.4	1.572314685	1.834989587	14.61720184	0.000131707	0.019831658	Syt12	protein_coding	0.604689805	0.166979193	1.86416163	0.878597113
ENSMUSG00000067833.2	1.541524494	2.16183533	19.4586129	1.02803E-05	0.003190676	2900097C17Rik	protein_coding	6.938156822	4.901417617	15.87075408	27.12439726
ENSMUSG00000045932.6	1.454210619	3.029569519	15.64949478	7.62329E-05	0.014426888	Ifit2	protein_coding	1.383753579	0.893058637	5.659851894	2.369307535
ENSMUSG00000062309.7	1.444021143	0.11078296	14.70734364	0.000125556	0.019287491	Rpp25	protein_coding	0.290594425	0.363461817	1.283204464	1.036594066
ENSMUSG00000032712.10	1.43279043	4.598222372	14.55972876	0.000135786	0.020245384	2810474O19Rik	protein_coding	2.827085414	1.710295901	11.57307492	4.128739817
ENSMUSG00000005087.10	1.419928904	2.262289583	13.49610794	0.000239059	0.029200432	Cd44	protein_coding	0.445021309	0.262402654	1.768609286	0.649414643
ENSMUSG00000086741.1	1.408604156	-0.133324144	14.80164202	0.000119431	0.018919934	Gm15816	processed_transcript	0.33564827	0.193759867	1.053838419	0.703313741
ENSMUSG00000036022.8	1.401977653	1.270396247	11.03794609	0.000892657	0.065574606	Fam122b	protein_coding	0.375142862	0.15434573	1.283062555	0.480212107
ENSMUSG00000029661.9	1.355882401	4.83257123	8.76525583	0.00307023	0.127226319	Col1a2	protein_coding	1.306744724	1.232546283	6.632346211	2.140917128
ENSMUSG00000046229.8	1.345807036	3.155314788	10.81219721	0.001008336	0.069921094	Scand1	protein_coding	6.884183196	4.879233493	10.66023174	26.62193154
ENSMUSG00000074896.3	1.315666762	2.534427774	11.48535021	0.000701469	0.056312322	Ifit3	protein_coding	2.018155771	1.32443336	6.824317365	3.829805889
ENSMUSG00000023092.9	1.282721303	6.093168943	13.41629385	0.000249448	0.029637546	Fhl1	protein_coding	13.25429541	10.514925	55.27369125	21.07327128
ENSMUSG00000027875.6	1.28131931	3.337683619	13.28278539	0.000267854	0.030696351	Hmgcs2	protein_coding	1.655019906	2.384664117	7.437796082	6.092623761
ENSMUSG00000050335.9	1.260791084	1.481090683	14.08080891	0.000175121	0.023758621	Lgals3	protein_coding	1.032875558	0.499132399	3.02570052	1.598613125
ENSMUSG00000024803.8	1.173733057	10.12295411	14.97237254	0.000109097	0.018034176	Ankrd1	protein_coding	594.2871114	331.3636701	1784.616234	850.8518219
ENSMUSG00000024640.3	1.164993621	0.750284323	10.54815628	0.00116304	0.076696207	Psat1	protein_coding	0.337839424	0.172862851	1.000661407	0.438226943
ENSMUSG00000039481.5	1.157696296	2.321775572	8.187932824	0.004216995	0.152177793	Nrtn	protein_coding	2.639724298	2.529484405	4.481695296	10.35516205
ENSMUSG00000073640.2	1.145968888	-0.673471936	7.585223774	0.005884866	0.18376468	Rpl27-ps3	protein_coding	1.007816341	0.458374256	2.657062956	1.426128647
ENSMUSG00000019796.5	1.143534507	1.237867476	11.21544627	0.000811193	0.061993081	Lrp11	protein_coding	0.687510116	0.30255926	1.873506784	0.817484033
ENSMUSG00000020325.9	1.136004585	1.673653997	12.31031084	0.000450463	0.041772198	Fstl3	protein_coding	1.24587728	0.567660823	3.307293208	1.679573334
ENSMUSG00000029762.6	1.132310124	1.326514755	15.11938834	0.000100921	0.017053484	Akr1b8	protein_coding	1.370787743	0.820779288	3.790592463	2.298303529
ENSMUSG00000050064.7	1.115146331	2.753822195	11.51777909	0.000689337	0.055762961	Zfp697	protein_coding	1.447590744	0.473697814	3.254387187	1.744001944
ENSMUSG00000020458.10	1.101375914	5.538709489	16.13211408	5.90738E-05	0.012140464	Rtn4	protein_coding	5.928465747	3.264020634	16.62452174	8.206521551
ENSMUSG00000022219.8	1.078489999	1.741741048	15.45691979	8.44073E-05	0.015101962	Cideb	protein_coding	2.09993016	1.076132844	5.294298564	3.121152941
ENSMUSG00000085162.1	1.065419642	1.719499871	10.27095622	0.001351407	0.083326413	Gm12295	processed_transcript	0.910307204	0.394704048	2.281466702	1.098144966
ENSMUSG00000021773.3	1.065083233	1.547853202	15.329617	9.02898E-05	0.015966599	Comtd1	protein_coding	0.961499387	0.612434238	2.601019034	1.541683659
ENSMUSG00000029223.8	1.064979125	2.280294978	11.22313769	0.000807838	0.061993081	Uchl1	protein_coding	3.131990529	2.340853225	10.256424	4.607637278
ENSMUSG00000047370.4	1.063616886	-0.252698202	7.542428354	0.006026277	0.185897809	Gm7367	protein_coding	0.618432755	0.687561384	1.845182609	1.671244508
ENSMUSG00000027293.7	1.058903586	7.708973673	12.65016244	0.000375533	0.037821898	Ehd4	protein_coding	54.82233982	22.85187133	127.512881	69.74582385
ENSMUSG00000039005.7	1.045834848	4.050763273	19.91874025	8.08044E-06	0.002614623	Tlr4	protein_coding	2.417867784	1.565905566	6.438018328	4.049819918
ENSMUSG00000026558.8	1.031990207	4.544720638	20.35538047	6.4312E-06	0.002247867	Uck2	protein_coding	16.43299765	8.389651011	38.15547757	24.92184047
ENSMUSG00000035049.3	1.028794293	4.134385294	11.23598426	0.000802265	0.061933267	Rrp12	protein_coding	3.932311847	1.971143015	9.917083568	5.087634904
ENSMUSG00000023341.8	1.022013651	0.850818885	8.276256394	0.004016686	0.148266405	Mx2	protein_coding	0.578313406	0.305153648	1.009406263	1.19556228
ENSMUSG00000004939.6	0.993212234	2.648517534	8.304190886	0.00395537	0.147528892	Itgb1bp3	protein_coding	2.866750901	1.496468162	7.634405294	3.296026049
ENSMUSG00000053746.6	0.978757785	-0.022375599	7.016648072	0.008075527	0.215548462	Ptrh1	protein_coding	0.481404157	0.205987614	1.143022804	0.56693606
ENSMUSG00000033684.8	0.959971913	4.254326423	12.91286231	0.000326332	0.034464273	Qsox1	protein_coding	3.052518068	1.586391833	7.399944832	3.890818195
ENSMUSG00000038670.8	0.956663063	4.242352991	12.82734973	0.000341589	0.035728997	Mybpc2	protein_coding	5.02860066	3.516078416	13.90015599	7.485533997
ENSMUSG00000049872.7	0.952669247	0.689093911	6.797370068	0.009129225	0.228350746	Fam26e	protein_coding	0.73028681	0.350139864	1.542671953	1.089381622
ENSMUSG00000029561.10	0.948935125	1.658782574	9.507613797	0.002046211	0.104076166	Oasl2	protein_coding	0.482032024	0.406608965	1.312451621	0.905181228
ENSMUSG00000041889.7	0.944877943	1.280750671	7.54983503	0.006001557	0.185889362	Shisa4	protein_coding	0.665903741	0.664053794	2.300414316	1.103062932
ENSMUSG00000048004.7	0.944576414	-0.279141455	6.720459928	0.009531304	0.232713384	Tmem196	protein_coding	0.485017517	0.419979505	1.122073933	1.088893329
ENSMUSG00000041920.8	0.931392316	1.759130148	11.72108634	0.000617959	0.052210644	Slc16a6	protein_coding	0.677165962	0.345473498	1.454703505	0.979512497
ENSMUSG00000024042.6	0.924802919	4.91493455	8.741735256	0.003110084	0.12797028	Sik1	protein_coding	6.547475148	2.43987204	13.76462733	6.877098683
ENSMUSG00000037341.7	0.921537226	1.048287834	7.318129688	0.006826242	0.19698953	Slc9a7	protein_coding	0.582692407	0.257225017	1.25175324	0.72249118
ENSMUSG00000037594.3	0.918938318	0.445028618	9.244039331	0.002362632	0.112636078	BC022687	protein_coding	0.704847849	0.355480035	1.465326168	1.083876438
ENSMUSG00000054716.3	0.912655123	2.155261144	12.3909563	0.000431418	0.040869392	Zfp771	protein_coding	2.064961193	2.006602883	5.016089102	4.914119039
ENSMUSG00000030107.9	0.907602458	0.915477615	8.545266878	0.003464218	0.13719747	Usp18	protein_coding	0.96286593	0.370556107	1.909339157	1.200939772
ENSMUSG00000037278.9	0.887187983	0.807242301	9.47895823	0.00207842	0.104318828	Tmem97	protein_coding	0.854627189	0.692823333	2.005923298	1.632070147
ENSMUSG00000038217.7	0.885460514	1.272529583	9.974944319	0.001586848	0.08971295	Tlcd2	protein_coding	1.171287117	0.535285082	2.274244988	1.621592597
ENSMUSG00000087471.1	0.882424546	2.478573763	10.08007006	0.001498816	0.086950575	Gm16836	lincRNA	2.002336404	1.17010163	4.759817994	2.634578645
ENSMUSG00000078164.1	0.877445123	0.809364324	9.495907373	0.002059307	0.104318828	Gm4392	protein_coding	4.111500339	2.330182146	7.728367205	7.2498389
ENSMUSG00000038508.7	0.870077968	1.391705278	6.932808453	0.00846287	0.222270293	Gdf15	protein_coding	1.221331293	0.352519303	2.093908035	1.416680256
ENSMUSG00000023905.8	0.868352088	5.454426152	14.23874605	0.000161021	0.0220613	Tnfrsf12a	protein_coding	37.99359649	23.81693993	86.28820416	56.96354129
ENSMUSG00000048070.4	0.862591803	1.972407003	6.671999333	0.009793926	0.235599977	Pirt	protein_coding	0.962071981	0.452860225	2.244529705	0.976216992
ENSMUSG00000036264.8	0.857143557	2.114114615	11.1921321	0.000821449	0.062462983	Fstl4	protein_coding	0.985184352	0.472974169	1.688841013	1.587728238
ENSMUSG00000054484.8	0.83838978	1.680587606	8.805444364	0.00300333	0.125762127	Tmem62	protein_coding	1.003280714	0.423717697	1.973332285	1.178866693
ENSMUSG00000025498.7	0.83019221	2.607204994	10.44015799	0.001233047	0.079542165	Irf7	protein_coding	1.569503227	1.071579007	3.665501748	2.325379362
ENSMUSG00000041420.9	0.826073657	1.048112971	7.080015268	0.007794835	0.212064123	Meis3	protein_coding	1.177619477	0.511009927	2.297461679	1.402846525
ENSMUSG00000020893.11	0.819547665	4.175839421	7.446303184	0.006356688	0.189437677	Per1	protein_coding	3.539587855	1.428894066	6.788534428	3.873018984
ENSMUSG00000028841.8	0.797313138	3.037289726	7.557760741	0.005975219	0.185451289	Cnksr1	protein_coding	3.509783593	1.541332829	6.970124281	3.824268468
ENSMUSG00000026782.8	0.796244296	3.212046283	10.99392114	0.000914112	0.065574606	Abi2	protein_coding	1.639896982	0.683701965	2.856376575	2.06969376
ENSMUSG00000091747.2	0.793263951	1.424428101	9.059285354	0.002613641	0.117598385	D17H6S56E-5	protein_coding	0.565550103	0.265261285	1.028015787	0.772397061
ENSMUSG00000031167.8	0.786152215	5.08706416	12.42434102	0.000423774	0.040533055	Rbm3	protein_coding	6.793680347	4.630635067	15.67798022	9.589780509
ENSMUSG00000074221.4	0.774376199	5.065977304	9.07000704	0.002598361	0.117257773	Zfp568	protein_coding	4.964552114	2.135437406	8.499456958	6.278753549
ENSMUSG00000020032.8	0.773667737	4.804198461	16.57253468	4.68242E-05	0.010172903	Nuak1	protein_coding	4.676712711	2.533133771	8.759657929	6.610346168
ENSMUSG00000078234.4	0.769374969	2.634380709	9.117101522	0.002532309	0.116089882	Klhdc7a	protein_coding	0.717675657	0.473171888	1.535751678	1.044589906
ENSMUSG00000039899.5	0.764075645	5.172554905	6.786018129	0.009187461	0.228851781	Fgl2	protein_coding	10.65619494	4.311242333	18.73980324	12.06318942
ENSMUSG00000020882.10	0.764070417	1.770929929	8.190860436	0.004210195	0.152177793	Cacnb1	protein_coding	0.558370183	0.517766797	1.251206424	1.114528548
ENSMUSG00000039376.7	0.759444376	6.045466402	13.98337417	0.000184434	0.024390237	Synpo2l	protein_coding	13.12974823	7.799896184	26.34946304	18.30122611
ENSMUSG00000020331.3	0.739585447	2.549581517	10.67203318	0.001087675	0.072869432	Hcn2	protein_coding	1.553423391	0.9714744	2.956553405	2.372946956
ENSMUSG00000029381.9	0.737671491	4.96843631	9.767892169	0.001775859	0.095246212	Shroom3	protein_coding	4.107117926	2.193045435	8.003381822	5.109188793
ENSMUSG00000021457.8	0.730819904	4.084930741	12.25706205	0.000463501	0.042720717	Sykb	protein_coding	1.732834877	1.045905314	3.408147814	2.408937698
ENSMUSG00000036944.5	0.723536803	2.278629708	7.670224316	0.005613948	0.1808833	Tmem71	protein_coding	1.531343855	0.86468906	3.145944752	1.851379606
ENSMUSG00000006301.10	0.715476577	5.219951463	7.656431143	0.00565703	0.181228978	Tmbim1	protein_coding	3.107130106	1.668297116	6.420354388	3.41359321
ENSMUSG00000074923.4	0.71327797	3.043470843	10.40193859	0.001258831	0.080438235	Pak6	protein_coding	1.486564341	0.945330791	2.915388521	2.120577878
ENSMUSG00000013584.5	0.711174022	1.654452248	7.439625342	0.006380317	0.189515357	Aldh1a2	protein_coding	1.235277435	0.615596626	2.280481688	1.520966202
ENSMUSG00000032420.6	0.710296793	3.570295864	7.743483388	0.005390671	0.176303938	Nt5e	protein_coding	3.50243182	2.129495633	7.589317193	4.105411433
ENSMUSG00000049092.10	0.709070755	1.18498648	7.630435832	0.005739143	0.182596005	Gpr137c	protein_coding	0.662657343	0.370009192	1.194753225	0.909448456
ENSMUSG00000038463.8	0.698927181	3.249056224	10.07695582	0.001501352	0.086950575	Olfml2b	protein_coding	2.264937899	1.284472466	4.034512395	3.161494373
ENSMUSG00000019810.9	0.697419194	6.592191052	7.598861179	0.005840518	0.183031002	Fuca2	protein_coding	18.49189542	9.057305447	35.00930068	20.33145947
ENSMUSG00000023959.7	0.689063192	7.554153057	8.110095973	0.00440194	0.155664641	Clic5	protein_coding	33.44670682	18.279169	65.62885455	38.86913628
ENSMUSG00000046841.4	0.688309725	3.299133448	8.394686692	0.003763194	0.143639188	Ckap4	protein_coding	2.943254648	1.619765077	5.595649131	3.622166207
ENSMUSG00000030681.11	0.687646931	5.144283756	10.43821187	0.001234347	0.079542165	Mvp	protein_coding	11.01493165	7.951864204	23.79183315	15.57623045
ENSMUSG00000032997.10	0.686018879	3.18646188	8.511175107	0.003529721	0.137640999	Chpf	protein_coding	2.011343713	1.318710548	4.227894111	2.60900577
ENSMUSG00000046442.4	0.685399981	2.396362378	6.823070408	0.008998773	0.227331121	Ppm1e	protein_coding	0.791482241	0.44628835	1.442450968	1.054017511
ENSMUSG00000018166.8	0.681340833	3.272383564	11.74137936	0.000611257	0.051932945	Erbb3	protein_coding	1.406976976	0.879890261	2.547313418	2.081408324
ENSMUSG00000024558.5	0.679164573	2.364932315	7.655811825	0.005658972	0.181228978	Mapk4	protein_coding	1.027115384	0.431568001	1.637616612	1.233435267
ENSMUSG00000029722.9	0.671923894	2.987963128	7.626262466	0.005752439	0.18263693	Agfg2	protein_coding	2.383997425	1.032158657	3.95181722	2.731860646
ENSMUSG00000025200.6	0.667209524	1.378947599	6.68609281	0.009716794	0.235307324	Cwf19l1	protein_coding	0.707530308	0.389070901	1.231669757	0.961284819
ENSMUSG00000019851.7	0.640593012	6.499978733	8.078689962	0.004478881	0.156585807	Perp	protein_coding	56.97314468	26.19996486	93.48904477	65.39923168
ENSMUSG00000036002.6	0.621919663	3.896907827	9.091917807	0.002567415	0.116552983	B230312A22Rik	protein_coding	3.745588296	2.144453175	6.720409692	4.660124823
ENSMUSG00000078349.2	0.619003685	2.774743424	9.023855484	0.002664787	0.11789314	AW011738	protein_coding	3.785524253	2.014476681	6.061230061	5.055247709
ENSMUSG00000031078.9	0.612459718	4.242358008	9.110152312	0.002541947	0.116089882	Cttn	protein_coding	4.726968578	2.578478822	7.962624319	5.95599328
ENSMUSG00000041957.8	0.606316234	6.771520102	10.82098604	0.00100356	0.069921094	Pkp2	protein_coding	20.10166687	13.90186882	37.77410076	28.4610283
ENSMUSG00000024312.9	0.602049018	2.167562832	7.534851828	0.006051671	0.185952229	Wdr46	protein_coding	1.752127126	1.039833983	2.688542729	2.626434021
ENSMUSG00000029246.8	0.599460629	3.648460219	7.909809325	0.004916745	0.164700133	Ppat	protein_coding	3.338321512	1.631983852	5.087716567	4.196165259
ENSMUSG00000047388.9	0.59732622	3.95594024	9.024902014	0.002663262	0.11789314	Atmin	protein_coding	3.252846019	1.839187901	5.245665208	4.387035697
ENSMUSG00000038178.9	0.594955628	3.042067029	7.391156748	0.006554532	0.193555973	Slc43a2	protein_coding	0.840396821	0.536400756	1.586669304	1.057806918
ENSMUSG00000020737.6	0.593895984	5.430208316	7.523877838	0.006088647	0.186685774	Hn1	protein_coding	19.51511741	12.47043204	36.63349608	24.72250243
ENSMUSG00000024644.9	0.591616599	3.191475463	6.79204431	0.009156499	0.228656884	Cndp2	protein_coding	4.493233729	2.809962543	8.302008129	5.654596702
ENSMUSG00000036833.9	0.585731072	3.91870614	8.408306883	0.003735104	0.143443067	Pnpla7	protein_coding	2.047764	1.34974793	3.7554422	2.727936703
ENSMUSG00000031490.5	0.581699128	5.272653852	7.630729608	0.005738209	0.182596005	Eif4ebp1	protein_coding	44.98188417	26.24227767	81.84550843	52.4873306
ENSMUSG00000003534.10	0.579764273	3.337610773	6.797740377	0.009127332	0.228350746	Ddr1	protein_coding	2.276526918	1.114935065	3.604033979	2.659467219
ENSMUSG00000017765.9	0.575557441	4.982191498	9.086279135	0.002575343	0.116564927	Slc12a4	protein_coding	7.924916903	4.242538528	12.92845428	9.639785792
ENSMUSG00000029028.8	0.55392399	3.734733217	8.46419446	0.003622056	0.140520999	Lrrc47	protein_coding	3.929942329	2.256115994	6.298504234	5.08966709
ENSMUSG00000020612.9	0.552974898	7.697563321	7.184440327	0.007353849	0.206094799	Prkar1a	protein_coding	51.54319508	25.29321838	77.29276014	61.31917819
ENSMUSG00000022750.10	0.545195202	3.581041656	7.251909529	0.007082566	0.203229545	Klhl22	protein_coding	1.832201674	1.354145913	3.269138593	2.703173893
ENSMUSG00000034863.7	0.543829621	3.543167531	6.899589134	0.008621556	0.223113744	Ano8	protein_coding	2.894406547	1.773746418	3.995393263	4.523454087
ENSMUSG00000030161.6	0.531471627	5.808917849	8.333128074	0.003892857	0.146637755	Gabarapl1	protein_coding	33.04551273	19.8947702	54.99008809	41.40935808
ENSMUSG00000038193.3	0.530965275	3.96068164	8.285713304	0.003995821	0.147959094	Hand2	protein_coding	7.312504969	4.220358311	11.15498411	9.687200771
ENSMUSG00000027244.8	0.520486046	4.194702697	6.952935625	0.00836818	0.220560289	Atg13	protein_coding	4.274853992	2.729609206	7.499012241	5.256840408
ENSMUSG00000050565.8	0.517559391	3.808431576	7.173893861	0.007397204	0.206094799	Tor1aip2	protein_coding	2.288785002	1.270942067	3.602842698	2.770535134
ENSMUSG00000026208.9	0.510104738	10.51378435	8.475019253	0.003600566	0.140044511	Des	protein_coding	440.0621762	253.8821328	708.3973843	530.571966
ENSMUSG00000044496.6	0.504162534	4.326298369	8.113319938	0.004394118	0.155664641	2510039O18Rik	protein_coding	7.5616452	4.201231931	10.75530428	10.02021356
ENSMUSG00000024516.6	-0.523619361	3.033402577	7.016743906	0.008075094	0.215548462	Sec11c	protein_coding	4.050619535	2.286024289	2.774214362	2.71865912
ENSMUSG00000070285.2	-0.548267541	4.198608034	6.884801624	0.008693172	0.223320528	BY080835	protein_coding	19.35200258	14.2463925	13.42101663	15.86192823
ENSMUSG00000004642.7	-0.552508821	2.666288785	6.831424478	0.008956781	0.226788482	Slbp	protein_coding	1.818809423	1.131358004	1.316332197	1.211171295
ENSMUSG00000013539.7	-0.573207822	5.583684158	9.049867026	0.002627139	0.117660156	D16H22S680E	protein_coding	9.426842713	6.845685847	6.555684459	7.380063602
ENSMUSG00000063953.2	-0.58656704	3.940997733	7.459670776	0.006309655	0.189264746	Amd2	protein_coding	6.717725798	4.048339942	3.935774504	4.990670351
ENSMUSG00000025701.6	-0.598808495	2.587349347	7.173398323	0.007399248	0.206094799	Alox5	protein_coding	2.429152031	1.618641089	1.515375372	1.857555205
ENSMUSG00000039488.8	-0.622360518	2.719661686	9.207661753	0.002410043	0.11293213	Cntn5	protein_coding	2.081754998	1.530915083	1.532099427	1.462683875
ENSMUSG00000022674.8	-0.64147215	3.150071788	6.748941519	0.009380332	0.231961114	Ube2v2	protein_coding	2.756185656	2.289724328	1.868033488	2.305393736
ENSMUSG00000030098.9	-0.641712605	3.881488814	7.383125931	0.006583864	0.194045349	Grip2	protein_coding	4.557598479	2.005879441	2.323497551	2.757582145
ENSMUSG00000048878.5	-0.657820391	3.686557698	6.908067794	0.008580767	0.223113744	Hexim1	protein_coding	5.351828134	2.667940394	2.634139276	3.566317811
ENSMUSG00000024525.6	-0.662294533	2.763369315	9.758528686	0.001784927	0.095246212	Impa2	protein_coding	6.121390988	3.565294859	3.640267337	4.012766246
ENSMUSG00000030560.9	-0.66751068	3.672092832	6.690288475	0.009693952	0.235128578	Ctsc	protein_coding	2.751722047	1.54736924	2.110032576	1.283811251
ENSMUSG00000016427.7	-0.670680318	6.941091458	8.414798928	0.00372179	0.143293609	Ndufa1	protein_coding	375.1904665	313.2387525	252.6296284	306.508814
ENSMUSG00000044067.4	-0.671689613	5.298023201	9.011347661	0.002683085	0.117931671	Gpr22	protein_coding	11.60789	8.183750756	7.063598984	8.683965879
ENSMUSG00000020801.8	-0.679215737	2.052410399	6.727225554	0.009495218	0.232713384	Med31	protein_coding	2.818021379	2.785101631	2.216100661	2.374367864
ENSMUSG00000029469.8	-0.692721782	4.944887533	7.768951885	0.005315188	0.174586136	Ift81	protein_coding	14.6024451	8.316948448	6.972467653	10.4884033
ENSMUSG00000045996.5	-0.702410912	2.720120746	11.86288532	0.000572638	0.049037942	Polr2k	protein_coding	15.81757691	10.24522361	10.77034589	9.411579481
ENSMUSG00000022602.7	-0.70817561	3.638415952	6.717250633	0.009548471	0.232713384	Arc	protein_coding	5.446240227	4.072911918	3.406059674	4.025696399
ENSMUSG00000060923.5	-0.709112843	5.223838661	7.581599344	0.00589671	0.18376468	Acyp2	protein_coding	53.38728147	47.89917592	35.89423632	44.80662949
ENSMUSG00000003545.2	-0.733718304	4.596522822	6.636025219	0.009993666	0.238305716	Fosb	protein_coding	11.92610789	5.385347018	7.668553314	5.073946498
ENSMUSG00000018899.9	-0.734151378	4.170390126	8.751611396	0.003093286	0.127833409	Irf1	protein_coding	6.113185938	2.870707539	3.130144689	3.442595045
ENSMUSG00000074181.1	-0.745726629	1.628764091	6.841165729	0.008908069	0.226396347	Gm3776	protein_coding	4.169874978	4.515845202	3.659597769	3.215677958
ENSMUSG00000037868.8	-0.780549092	1.215458277	9.235407127	0.002373796	0.112814663	Egr2	protein_coding	1.08793292	0.728393573	0.701136762	0.63504336
ENSMUSG00000049588.7	-0.783264765	1.908539261	8.517864499	0.003516769	0.137517369	Ccdc69	protein_coding	2.571223104	1.976785663	1.773620393	1.583479207
ENSMUSG00000047658.6	-0.801312755	1.331474559	7.685945031	0.005565253	0.180077377	Gal3st3	protein_coding	1.275172988	0.909781906	0.733067089	0.873636501
ENSMUSG00000023267.4	-0.807116676	0.675470951	8.593192356	0.00337422	0.134685392	Gabrr2	protein_coding	1.409587169	0.751886936	0.846088888	0.705831571
ENSMUSG00000023259.9	-0.809640107	1.900326195	10.08104174	0.001498026	0.086950575	Slc26a6	protein_coding	2.062974691	1.658746005	1.220986758	1.515477715
ENSMUSG00000063060.5	-0.812816075	2.603798048	7.955898285	0.004793091	0.163882963	Sox7	protein_coding	2.121317747	1.351341822	1.401084775	1.102372349
ENSMUSG00000067586.3	-0.831534889	2.838643089	6.876106202	0.008735567	0.223654049	S1pr3	protein_coding	2.277000167	1.266435298	1.321746871	1.150019068
ENSMUSG00000059588.7	-0.841942921	3.651637129	6.85341021	0.008847224	0.225752663	Calcrl	protein_coding	2.936235234	1.970203896	1.974747342	1.519438082
ENSMUSG00000087523.1	-0.846552324	0.490854215	6.665171629	0.009831519	0.235599977	Gm12319	processed_transcript	5.504922549	3.060132357	2.365160265	3.570343198
ENSMUSG00000057123.7	-0.854970375	3.263263897	6.983157123	0.008228033	0.218380332	Gja5	protein_coding	2.564807991	1.182869106	1.218977779	1.295441597
ENSMUSG00000085853.1	-0.855612302	2.799143541	12.81960631	0.000343006	0.035728997	Gm12167	processed_transcript	17.7933029	11.78761921	8.827148579	11.73585033
ENSMUSG00000070392.2	-0.856654407	2.033714485	9.334934499	0.002248261	0.109359344	Hist2h3c1	protein_coding	2.293407137	1.011325055	1.152733173	1.0726742
ENSMUSG00000028307.9	-0.866347347	4.231834758	10.69801263	0.001072507	0.072491928	Aldob	protein_coding	15.77035257	7.901327264	6.305659808	9.489188803
ENSMUSG00000029174.11	-0.872429052	2.748387102	9.029233533	0.002656959	0.11789314	Tbc1d1	protein_coding	1.403650384	0.698431347	0.694842458	0.712463089
ENSMUSG00000039304.5	-0.894053098	2.388696008	6.960896828	0.008331026	0.22034478	Tnfsf10	protein_coding	1.287970472	0.851935612	0.682843851	0.771085527
ENSMUSG00000020077.8	-0.902804725	2.914285617	8.07115687	0.004497539	0.156877473	Srgn	protein_coding	4.146365449	2.741921928	2.258793482	2.393277106
ENSMUSG00000031328.9	-0.904486131	6.936727745	8.890981206	0.002865827	0.12235555	Flna	protein_coding	17.47321719	10.24220248	8.626184316	9.782091555
ENSMUSG00000041396.7	-0.907091824	0.672546185	9.130583407	0.002513715	0.115844197	2810422O20Rik	protein_coding	1.408311313	1.04249049	0.864390508	0.782907818
ENSMUSG00000048218.5	-0.910000133	1.766931333	8.19764474	0.004194481	0.152177793	Amigo2	protein_coding	1.846699939	0.653171332	0.812935105	0.780481088
ENSMUSG00000026185.8	-0.923325099	5.527013375	11.03203346	0.000895509	0.065574606	Igfbp5	protein_coding	8.972071924	6.715007198	4.033553196	6.461952375
ENSMUSG00000028005.8	-0.926738538	2.742091398	9.456646853	0.002103853	0.105248022	Gucy1b3	protein_coding	2.763704294	1.812256326	1.585135557	1.461814906
ENSMUSG00000030247.7	-0.930168101	2.355179007	7.011478126	0.008098879	0.215705338	Kcnj8	protein_coding	2.961432781	2.262187089	2.028096363	1.508204472
ENSMUSG00000050919.8	-0.932262602	2.093579888	10.91848041	0.000952097	0.067661156	Zfp366	protein_coding	1.669085775	1.319529516	1.167001062	0.842530226
ENSMUSG00000030987.4	-0.936418335	2.551184757	9.541280931	0.002009015	0.103219926	Stim1	protein_coding	1.695922211	1.65148984	1.092965739	1.213850293
ENSMUSG00000004791.6	-0.946838942	0.702236222	6.736397644	0.009446519	0.232463853	Pgf	protein_coding	1.075353124	0.706987721	0.681182842	0.482846413
ENSMUSG00000033446.6	-0.956400311	1.75979905	8.559827144	0.00343662	0.136459855	Lpar6	protein_coding	1.337862544	1.354080658	0.79413907	1.010415326
ENSMUSG00000040710.4	-0.964888373	2.385652458	6.810204518	0.009063838	0.228143997	St8sia4	protein_coding	1.028255357	0.894236791	0.655773667	0.625217331
ENSMUSG00000090247.1	-0.969381026	0.269826662	7.017323962	0.008072479	0.215548462	Bloc1s1	protein_coding	1.017042678	1.123661013	0.655450347	0.758570185
ENSMUSG00000038146.7	-0.974398322	4.163539099	7.47173617	0.006267508	0.188645289	Notch3	protein_coding	3.117081555	2.000201979	1.810881698	1.487234459
ENSMUSG00000040289.3	-0.976399465	2.330036001	7.393384585	0.006546419	0.193555973	Hey1	protein_coding	2.864886141	1.482730191	1.400659817	1.326289909
ENSMUSG00000072852.3	-0.98017582	0.509480309	9.205116	0.002413397	0.11293213	2310040G07Rik	processed_transcript	2.311741873	2.030876813	1.123292916	1.713523394
ENSMUSG00000064358.1	-0.988791523	16.25490951	6.706962925	0.009603715	0.233311983	mt-Co3	protein_coding	75080.32002	121981.3316	65376.4892	73211.7416
ENSMUSG00000067818.6	-0.992379983	4.788024444	7.913879459	0.004905696	0.164692757	Myl9	protein_coding	32.66454762	22.9605721	14.90423147	20.43132492
ENSMUSG00000061353.5	-0.99630182	5.654700345	7.238960915	0.007133825	0.204214226	Cxcl12	protein_coding	7.890635955	5.303468098	4.349004876	4.042428219
ENSMUSG00000030790.7	-0.99742998	1.774632247	10.06509962	0.001511044	0.086950575	Adm	protein_coding	3.956538694	1.865563336	1.989968738	1.588540261
ENSMUSG00000045667.7	-1.00422764	2.374148154	20.67712234	5.43616E-06	0.001968409	Smtnl2	protein_coding	1.996283532	1.191357675	0.943461691	1.054284426
ENSMUSG00000027800.8	-1.005176638	4.588258695	6.977234011	0.00825531	0.218722575	Tm4sf1	protein_coding	8.431308099	5.491763067	4.291228983	4.454575446
ENSMUSG00000064357.1	-1.0090956	13.76009995	6.891872947	0.00865885	0.223320528	mt-Atp6	protein_coding	16058.3583	26519.24763	15813.34173	13936.90905
ENSMUSG00000031520.4	-1.010691879	1.743770232	9.167537677	0.002463458	0.114220332	Vegfc	protein_coding	2.231191243	1.683032275	1.210627437	1.2755278
ENSMUSG00000090378.1	-1.014665156	13.86070369	7.122463152	0.007612405	0.20841798	Gm10925	protein_coding	15306.12893	25176.58521	14968.28619	13197.45446
ENSMUSG00000039706.6	-1.017791283	1.215865494	12.33372914	0.000444847	0.041598535	Ldb2	protein_coding	1.127562092	0.819219282	0.658995802	0.564611356
ENSMUSG00000018604.11	-1.020545574	2.073210628	7.471220912	0.006269302	0.188645289	Tbx3	protein_coding	1.09461212	0.59834272	0.5225491	0.512731325
ENSMUSG00000025314.9	-1.031747596	3.003889871	8.088175008	0.004455501	0.156182389	Ptprj	protein_coding	1.633286	0.787207961	0.832469306	0.622425982
ENSMUSG00000059408.2	-1.042744508	1.531546119	12.14270604	0.000492802	0.044610332	Mrgprh	protein_coding	2.209817729	1.682395776	0.928796343	1.472174145
ENSMUSG00000028464.9	-1.046740446	4.035278611	10.19072782	0.001411486	0.083648989	Tpm2	protein_coding	8.460918316	4.8979265	3.409999264	4.589122162
ENSMUSG00000027276.7	-1.052787718	3.510302142	7.300859071	0.006892165	0.198515237	Jag1	protein_coding	2.993982925	1.30129465	1.149674067	1.339853026
ENSMUSG00000063415.5	-1.056434062	1.919939023	9.402267477	0.002167173	0.106661362	Cyp26b1	protein_coding	1.880765341	0.691526645	1.005000091	0.478117776
ENSMUSG00000038422.2	-1.061508357	0.239321691	8.89485648	0.002859751	0.12235555	Hdhd3	protein_coding	1.115165284	0.757175082	0.616017531	0.495953763
ENSMUSG00000033910.8	-1.067267566	3.712968214	10.41505804	0.001249919	0.08020579	Gucy1a3	protein_coding	3.983679955	2.497147735	1.747726452	2.119731105
ENSMUSG00000060678.4	-1.070853817	1.843602517	13.69426344	0.000215111	0.027490768	Hist1h4c	protein_coding	12.67560423	8.547400148	7.458658958	5.361555986
ENSMUSG00000027314.6	-1.079089349	3.085338566	9.114691585	0.002535647	0.116089882	Dll4	protein_coding	2.351722532	1.774753278	1.177996091	1.319939427
ENSMUSG00000023064.4	-1.079268186	1.754720119	7.621490859	0.005767679	0.182650238	Sncg	protein_coding	5.947598336	3.976004319	2.698541441	3.242253809
ENSMUSG00000021186.8	-1.08228758	2.9947113	14.45751838	0.000143356	0.020728159	Fbln5	protein_coding	2.127346316	1.157674685	0.922020433	0.994864452
ENSMUSG00000042116.3	-1.099240622	2.371946507	7.162289205	0.007445212	0.206384701	Vwa1	protein_coding	1.163992558	1.283264263	0.760466086	0.770499596
ENSMUSG00000038457.9	-1.103679719	0.89523494	8.303028209	0.003957903	0.147528892	Fam70b	protein_coding	1.590505754	1.275765769	1.002745097	0.706393539
ENSMUSG00000027500.8	-1.120718765	1.342690036	6.95621314	0.008352864	0.220538814	Stmn2	protein_coding	1.783761107	1.229934714	0.933415598	0.823178127
ENSMUSG00000064363.1	-1.135155187	13.56269169	7.611134195	0.005800899	0.182650238	mt-Nd4	protein_coding	6351.138817	12288.67901	6591.818362	5546.194113
ENSMUSG00000043631.7	-1.136750638	2.291445314	7.737947083	0.005407224	0.176465799	Ecm2	protein_coding	1.50168365	1.590441071	0.975590135	0.895406762
ENSMUSG00000029641.7	-1.140197378	1.101064318	11.57442125	0.000668652	0.054775304	Rasl11a	protein_coding	2.554571902	1.645980283	0.956205861	1.43089512
ENSMUSG00000022836.9	-1.152917905	4.778268699	9.226931256	0.00238481	0.11293213	Mylk	protein_coding	3.734439781	2.135470643	1.351745178	1.902284518
ENSMUSG00000048583.9	-1.155968035	3.493217274	8.372618765	0.003809163	0.144415699	Igf2	protein_coding	2.992831183	1.658734004	1.173596692	1.40188316
ENSMUSG00000064345.1	-1.161500068	13.46448889	8.368690459	0.003817406	0.144415699	mt-Nd2	protein_coding	8788.816176	15426.70338	7840.747661	7449.075793
ENSMUSG00000022595.5	-1.162021755	-0.720107701	7.32194674	0.006811759	0.196945297	Lypd2	protein_coding	1.154992615	1.396456676	0.661648459	0.824006512
ENSMUSG00000001663.4	-1.16383516	2.645689627	23.35668103	1.34575E-06	0.000730936	Gstt1	protein_coding	5.506931938	4.496705661	2.788965629	2.970203381
ENSMUSG00000067736.1	-1.165611821	9.626701065	7.673032168	0.005605219	0.1808833	Gm10222	protein_coding	2052.253311	4021.043639	2260.765607	1630.585388
ENSMUSG00000051439.6	-1.173640933	1.029660136	7.980818643	0.004727556	0.163030998	Cd14	protein_coding	2.046911753	0.795731869	1.06959477	0.457473911
ENSMUSG00000064356.3	-1.179461796	9.801373807	9.804533851	0.001740822	0.094290585	mt-Atp8	protein_coding	3798.321231	6167.293521	3455.496558	2737.447791
ENSMUSG00000044405.4	-1.183535884	0.045916837	9.759039456	0.001784431	0.095246212	Adig	protein_coding	1.454774817	1.853259437	0.752358328	1.153200181
ENSMUSG00000020427.5	-1.184248074	2.542895405	7.153083543	0.007483521	0.206550625	Igfbp3	protein_coding	3.057311652	1.390524143	1.134435981	1.243812361
ENSMUSG00000065947.3	-1.184398819	8.936187479	7.919644342	0.004890088	0.164692757	mt-Nd4l	protein_coding	1287.133135	2493.276437	1397.495427	991.5683377
ENSMUSG00000031883.6	-1.188600958	1.040468541	13.2949523	0.000266122	0.030696351	Car7	protein_coding	1.11671286	0.742706613	0.571178159	0.465601899
ENSMUSG00000085643.1	-1.202180882	0.845977577	16.60030052	4.61437E-05	0.010170341	Gm12519	processed_transcript	3.735037343	2.692113524	1.563940198	2.03238924
ENSMUSG00000046618.7	-1.202691409	1.976432977	13.27860779	0.000268452	0.030696351	Olfml2a	protein_coding	1.13032126	0.453375829	0.393532969	0.439857395
ENSMUSG00000032085.4	-1.21496472	4.872311185	9.805309533	0.001740087	0.094290585	Tagln	protein_coding	24.4195099	18.31192106	10.53301659	12.96065444
ENSMUSG00000073599.3	-1.220912154	2.059226328	7.927702078	0.004868359	0.164692757	Ecscr	protein_coding	3.410690423	2.279505068	1.733852166	1.367775362
ENSMUSG00000037949.6	-1.229167197	5.12991411	19.23686659	1.15462E-05	0.00344303	Ano10	protein_coding	22.06928409	13.80161046	6.996044629	11.99763975
ENSMUSG00000043795.2	-1.236830517	2.321956073	13.23774554	0.000274368	0.03090803	Gm14492	protein_coding	2.149153494	2.421571248	0.955212621	1.604166572
ENSMUSG00000026463.10	-1.238795442	3.564907744	13.20124879	0.000279763	0.030960854	Atp2b4	protein_coding	1.697940493	1.134250991	0.865258039	0.661681398
ENSMUSG00000089671.1	-1.241628692	-0.35955792	9.815794265	0.001730195	0.094290585	Gm16537	processed_transcript	1.553208953	1.049047519	0.467129491	0.967074362
ENSMUSG00000027859.4	-1.243441727	0.323368652	11.00636735	0.000907994	0.065574606	Ngf	protein_coding	1.505102803	1.03308568	0.354874004	0.964264287
ENSMUSG00000042485.6	-1.243856334	2.015330668	10.10172644	0.001481305	0.086950575	Mustn1	protein_coding	5.326739366	3.42375115	1.82770524	2.771020196
ENSMUSG00000060703.6	-1.245941236	0.308002643	11.32291727	0.000765563	0.060323232	Cd302	protein_coding	1.417522094	0.725305852	0.726684379	0.376104402
ENSMUSG00000018830.7	-1.247465124	6.181680665	11.47013205	0.000707237	0.056312322	Myh11	protein_coding	17.42380847	10.08456402	5.471551629	8.789599828
ENSMUSG00000042834.8	-1.257980499	2.083192601	10.0138634	0.001553663	0.088164559	D0H4S114	protein_coding	1.471832695	1.98167363	0.669562914	1.280274581
ENSMUSG00000064360.1	-1.261953243	12.81125881	9.51046268	0.002043036	0.104076166	mt-Nd3	protein_coding	16619.05094	27894.15036	11528.47122	14393.90205
ENSMUSG00000026676.7	-1.285845673	1.020640933	7.236467861	0.007143738	0.204214226	Ccdc3	protein_coding	1.09098515	0.794291947	0.437253622	0.554449622
ENSMUSG00000052544.5	-1.306750327	-0.372826305	6.720827293	0.009529341	0.232713384	St6galnac3	protein_coding	1.04645114	0.505692737	0.51091146	0.231374924
ENSMUSG00000048096.6	-1.327773699	2.120771298	7.469819079	0.006274186	0.188645289	Lmod1	protein_coding	1.409061713	1.184104447	0.425668894	0.88889026
ENSMUSG00000027574.9	-1.332370319	0.354294717	8.575600415	0.003406976	0.135636884	Nkain4	protein_coding	1.306362379	1.037770495	0.227542519	0.961767246
ENSMUSG00000009876.7	-1.342936879	0.367812212	9.441700761	0.002121067	0.105660095	Cox4i2	protein_coding	2.052140136	1.699585005	0.65531083	1.241032448
ENSMUSG00000024610.8	-1.357003779	4.082648771	13.81674332	0.000201532	0.026195747	Cd74	protein_coding	7.656422138	8.00609039	4.095278094	4.040952318
ENSMUSG00000060093.4	-1.370780449	-0.532412261	9.098177577	0.002558643	0.116502526	Hist1h4a	protein_coding	1.775854816	1.110577774	0.780327039	0.628238828
ENSMUSG00000044921.4	-1.442364114	1.919320118	13.11416729	0.000293071	0.032064924	Rassf9	protein_coding	2.565437283	1.527354577	1.036092707	0.858558426
ENSMUSG00000000889.7	-1.461005659	0.878321825	21.19169547	4.15561E-06	0.001708069	Dbh	protein_coding	1.053677473	0.942798337	0.522354046	0.425802408
ENSMUSG00000023829.8	-1.461548116	0.666743391	10.30477065	0.001326867	0.083326413	Slc22a1	protein_coding	0.854100439	1.342183619	0.305799704	0.767002623
ENSMUSG00000078739.2	-1.475212697	0.767024537	8.968186929	0.002747211	0.120056269	Gm1987	protein_coding	3.015814051	1.980320028	1.133762203	1.124685656
ENSMUSG00000091658.1	-1.506340595	-1.213383283	10.36939906	0.001281212	0.081186162	Gm17405	protein_coding	8.010939071	3.955146796	3.170131208	2.0509253
ENSMUSG00000045730.3	-1.506616232	0.907329306	11.31336976	0.00076951	0.060323232	Adrb2	protein_coding	1.054267769	0.836821908	0.391985011	0.453654718
ENSMUSG00000066975.5	-1.529740095	1.357087594	9.411158109	0.00215669	0.106490053	Cryba4	protein_coding	2.426995184	5.489862893	1.386629499	2.51183479
ENSMUSG00000050234.7	-1.542420543	2.156170033	11.86191135	0.000572937	0.049037942	Gja4	protein_coding	3.715740948	2.904671087	1.274941148	1.631722505
ENSMUSG00000085272.1	-1.545155948	1.21891585	7.596214828	0.005849097	0.183031002	Gm1078	protein_coding	2.44893171	0.340334269	0.818354673	0.251482507
ENSMUSG00000060586.8	-1.645282593	2.839674624	15.80685726	7.01478E-05	0.013850524	H2-Eb1	protein_coding	4.225201411	4.825145245	1.618015965	2.216109808
ENSMUSG00000053719.8	-1.658127422	1.289427191	8.701824563	0.003178917	0.129611178	Klk1b26	protein_coding	7.704918478	2.158926903	1.236017253	2.385027647
ENSMUSG00000070423.3	-1.661173185	1.471786867	13.01849243	0.00030843	0.033266693	Olfr558	protein_coding	1.505732906	0.857740497	0.20817055	0.710677651
ENSMUSG00000038530.5	-1.713900018	2.734976701	22.68986186	1.9037E-06	0.000965047	Rgs4	protein_coding	2.975655182	2.308575125	0.799046369	1.256274605
ENSMUSG00000037362.8	-1.742375821	1.016727854	14.71646991	0.00012495	0.019287491	Nov	protein_coding	1.076595072	0.531035538	0.244306301	0.339290645
ENSMUSG00000009185.2	-1.796941705	0.119742135	6.737770164	0.009439254	0.232463853	Ccl8	protein_coding	5.984134967	1.176163076	1.928288471	0.415837216
ENSMUSG00000073421.4	-1.833034717	2.598998399	34.46040783	4.3501E-09	6.10819E-06	H2-Ab1	protein_coding	2.838586615	2.173357594	0.940333011	0.877500354
ENSMUSG00000030048.4	-1.973551398	-0.8036985	14.82717803	0.000117825	0.018861955	Gkn3	protein_coding	1.295576442	0.388907036	0.166991228	0.352915785
ENSMUSG00000036594.7	-2.005356693	3.167169869	24.35351852	8.01802E-07	0.000468992	H2-Aa	protein_coding	3.446993127	3.597357312	0.872553086	1.43108549
ENSMUSG00000031722.9	-2.006719002	-0.908396295	10.63649533	0.001108776	0.073634344	Hp	protein_coding	1.136001705	0.162383705	0.244038501	0.126305116
ENSMUSG00000030772.5	-2.060103497	1.165110087	9.784361309	0.001760024	0.094916446	Dkk3	protein_coding	2.26928976	0.25950361	0.320353233	0.340616498
ENSMUSG00000052305.5	-2.161080082	3.9133025	8.621938623	0.003321382	0.133628499	Hbb-b1	protein_coding	5.049735155	40.42221346	7.919008821	7.958544081
ENSMUSG00000069917.6	-2.175104201	3.463082483	7.71463709	0.005477487	0.177615399	Hba-a2	protein_coding	4.101868826	39.69971184	6.57382959	8.614501229
ENSMUSG00000023078.4	-2.350392267	-1.364130661	21.42691309	3.67575E-06	0.001554159	Cxcl13	protein_coding	1.002178208	0.278550509	0.079737122	0.216661852
ENSMUSG00000069919.6	-2.402521445	3.630948157	9.220330293	0.002393424	0.11293213	Hba-a1	protein_coding	3.650290628	36.18918577	4.843364861	6.893542738
ENSMUSG00000073940.3	-2.498558584	2.680132826	11.15159801	0.000839593	0.06352504	Hbb-b2	protein_coding	2.915861356	22.54169997	3.531784952	3.500636497
ENSMUSG00000056071.6	-3.448308123	0.202488364	30.88154237	2.74268E-08	2.78071E-05	S100a9	protein_coding	8.283900791	1.726852146	0.539262617	0.488428453
ENSMUSG00000056054.8	-3.537541835	-0.31729324	30.65143062	3.08799E-08	2.93513E-05	S100a8	protein_coding	9.266069289	1.466149532	0.359739458	0.651656471
ENSMUSG00000061086.6	-4.353802877	3.061105126	34.26088514	4.81972E-09	6.10819E-06	Myl4	protein_coding	9.059176837	1.027403387	0.201669764	0.319653511
ENSMUSG00000020469.8	-4.474680974	2.99274003	40.36662811	2.10506E-10	6.40276E-07	Myl7	protein_coding	71.73395644	8.24542953	1.280170603	2.536393038
ENSMUSG00000068745.5	-4.529327461	0.295689005	35.31201328	2.80894E-09	5.71273E-06	Mybphl	protein_coding	5.042555436	0.407594643	0.184226763	0.066744172
ENSMUSG00000042045.5	-6.315699037	0.91660905	38.92120698	4.41261E-10	1.11845E-06	Sln	protein_coding	21.67153395	1.42940393	0	0.329427378
