# Supplementary material for: 8-Oxoguanine DNA Glycosylase (OGG1) Deficiency Exacerbates Doxorubicin-Induced Cardiac Dysfunction
Source: Oxid Med Cell Longev. 2022 Mar 27;2022:9180267. doi: 10.1155/2022/9180267 (PMC8981022; doi:10.1155/2022/9180267)
Supplement: Supplementary 8 — Supplementary Table 8: commonly dysregulated genes and gene ontology terms in KO DXB- and WT DXB-treated cells. [file 9180267.f8.txt]

Commonly Upregulated		Commonly downregulated								
Sprr1a		Ctsc								
Uba52		Irf1		Analysis Type:	PANTHER Overrepresentation Test (Released 20210224)					
Fstl4		Slc26a6		Annotation Version and Release Date:	GO Ontology database DOI:  10.5281/zenodo.5080993 Released 2021-07-02					
Scand1		Ldb2		Analyzed List:	upload_1 (Mus musculus)					
Gm16869		Gstt1		Reference List:	Mus musculus (all genes in database)					
Itgb1bp3		Arc		Test Type:	FISHER					
2900097C17Rik		Igfbp5		Correction:	BONFERRONI					
Serpina3n		Car7		Bonferroni count:	9132					
Lgals3		Calcrl		GO biological process complete	Mus musculus - REFLIST (21988)	upload_1 (69)	upload_1 (expected)	upload_1 (over/under)	upload_1 (fold Enrichment)	upload_1 (P-value)
Nrtn		Tnfsf10		antigen processing and presentation of exogenous peptide antigen via MHC class II (GO:0019886)	24	4	0.08	+	53.11	0.0155
Rpp25		Rgs4		antigen processing and presentation of peptide antigen via MHC class II (GO:0002495)	26	4	0.08	+	49.03	0.0206
Ctgf		mt-Atp6		antigen processing and presentation of peptide or polysaccharide antigen via MHC class II (GO:0002504)	27	4	0.08	+	47.21	0.0236
Gm4392		Gm10925		antigen processing and presentation of exogenous peptide antigen (GO:0002478)	32	4	0.1	+	39.83	0.0437
Zfp771		mt-Atp8		oxidative phosphorylation (GO:0006119)	80	7	0.25	+	27.88	0.0000939
Tnfrsf12a		mt-Nd4l		ATP synthesis coupled electron transport (GO:0042773)	60	5	0.19	+	26.56	0.0169
Cnksr1		Gm10222		reactive oxygen species metabolic process (GO:0072593)	99	6	0.31	+	19.31	0.00865
Mapk4		mt-Nd2		aerobic respiration (GO:0009060)	120	7	0.38	+	18.59	0.0013
Zfp697		mt-Co3		response to interferon-gamma (GO:0034341)	126	6	0.4	+	15.17	0.0329
Gm12295		mt-Nd3		cellular respiration (GO:0045333)	149	7	0.47	+	14.97	0.00528
Shisa4		mt-Nd4		ATP metabolic process (GO:0046034)	177	7	0.56	+	12.6	0.016
Fstl3		Ano10		energy derivation by oxidation of organic compounds (GO:0015980)	210	7	0.66	+	10.62	0.0476
Akr1b8		St8sia4		Unclassified (UNCLASSIFIED)	1305	1	4.1	-	0.24	0
Hn1		D0H4S114								
Ehd4		Gm12319								
Rrp12		Cd74								
Gm129		H2-Ab1								
Synpo2l		H2-Eb1								
Hand2		H2-Aa								
Agfg2		Hbb-b1								
Mybpc2		Hbb-b2								
Uck2		Hba-a1								
Atg13		Hba-a2								
Clic5										
Des										
Shroom3										
Perp										
Olfml2b										
Eif4ebp1										
