# Supplementary material for: 8-Oxoguanine DNA Glycosylase (OGG1) Deficiency Exacerbates Doxorubicin-Induced Cardiac Dysfunction
Source: Oxid Med Cell Longev. 2022 Mar 27;2022:9180267. doi: 10.1155/2022/9180267 (PMC8981022; doi:10.1155/2022/9180267)
Supplement: Supplementary 9 — Supplementary Table 9: gene ontology terms in the genes only dysregulated in the KO DXB-treated CMs. [file 9180267.f9.txt]

Analysis Type:	PANTHER Overrepresentation Test (Released 20210224)					
Annotation Version and Release Date:	GO Ontology database DOI:  10.5281/zenodo.5080993 Released 2021-07-02					
Analyzed List:	upload_1 (Mus musculus)					
Reference List:	Mus musculus (all genes in database)					
Test Type:	FISHER					
Correction:	BONFERRONI					
Bonferroni count:	9132					
GO biological process complete	Mus musculus - REFLIST (21988)	upload_1 (359)	upload_1 (expected)	upload_1 (over/under)	upload_1 (fold Enrichment)	upload_1 (P-value)
response to interferon-gamma (GO:0034341)	126	16	2.06	+	7.78	0.0000112
cellular response to interferon-gamma (GO:0071346)	98	12	1.6	+	7.5	0.00193
angiogenesis (GO:0001525)	325	23	5.31	+	4.33	0.000113
regulation of angiogenesis (GO:0045765)	294	20	4.8	+	4.17	0.00187
regulation of vasculature development (GO:1901342)	298	20	4.87	+	4.11	0.00228
blood vessel morphogenesis (GO:0048514)	440	27	7.18	+	3.76	0.000104
positive regulation of ion transport (GO:0043270)	328	19	5.36	+	3.55	0.0357
regulation of epithelial cell proliferation (GO:0050678)	400	22	6.53	+	3.37	0.0139
blood vessel development (GO:0001568)	543	29	8.87	+	3.27	0.000527
vasculature development (GO:0001944)	574	30	9.37	+	3.2	0.000485
tube morphogenesis (GO:0035239)	740	38	12.08	+	3.15	0.0000116
circulatory system process (GO:0003013)	454	23	7.41	+	3.1	0.0298
response to cytokine (GO:0034097)	786	39	12.83	+	3.04	0.0000173
chemotaxis (GO:0006935)	496	24	8.1	+	2.96	0.0385
cellular response to cytokine stimulus (GO:0071345)	683	33	11.15	+	2.96	0.000598
taxis (GO:0042330)	501	24	8.18	+	2.93	0.0453
positive regulation of cell migration (GO:0030335)	571	27	9.32	+	2.9	0.0145
positive regulation of locomotion (GO:0040017)	614	29	10.02	+	2.89	0.00604
circulatory system development (GO:0072359)	933	44	15.23	+	2.89	0.00000658
positive regulation of cell motility (GO:2000147)	597	28	9.75	+	2.87	0.0108
actin filament-based process (GO:0030029)	581	27	9.49	+	2.85	0.0199
regulation of cell migration (GO:0030334)	956	44	15.61	+	2.82	0.0000135
positive regulation of cellular component movement (GO:0051272)	614	28	10.02	+	2.79	0.0182
regulation of locomotion (GO:0040012)	1057	48	17.26	+	2.78	0.00000341
heart development (GO:0007507)	573	26	9.36	+	2.78	0.0463
tube development (GO:0035295)	963	43	15.72	+	2.73	0.0000498
regulation of cell motility (GO:2000145)	1010	45	16.49	+	2.73	0.0000226
anatomical structure formation involved in morphogenesis (GO:0048646)	956	41	15.61	+	2.63	0.00034
regulation of cellular component movement (GO:0051270)	1095	46	17.88	+	2.57	0.000137
regulation of anatomical structure morphogenesis (GO:0022603)	981	41	16.02	+	2.56	0.00107
negative regulation of multicellular organismal process (GO:0051241)	1108	44	18.09	+	2.43	0.000911
regulation of response to external stimulus (GO:0032101)	934	37	15.25	+	2.43	0.0114
regulation of cell population proliferation (GO:0042127)	1721	61	28.1	+	2.17	0.000164
response to biotic stimulus (GO:0009607)	1517	53	24.77	+	2.14	0.00293
response to other organism (GO:0051707)	1479	51	24.15	+	2.11	0.00681
response to external biotic stimulus (GO:0043207)	1481	51	24.18	+	2.11	0.00697
anatomical structure morphogenesis (GO:0009653)	2282	78	37.26	+	2.09	0.0000053
regulation of multicellular organismal development (GO:2000026)	1474	50	24.07	+	2.08	0.0126
response to external stimulus (GO:0009605)	2425	79	39.59	+	2	0.0000294
biological process involved in interspecies interaction between organisms (GO:0044419)	1598	52	26.09	+	1.99	0.0291
regulation of multicellular organismal process (GO:0051239)	2852	92	46.56	+	1.98	0.00000143
regulation of developmental process (GO:0050793)	2562	81	41.83	+	1.94	0.0000699
cellular response to organic substance (GO:0071310)	1848	58	30.17	+	1.92	0.02
cellular response to chemical stimulus (GO:0070887)	2441	76	39.85	+	1.91	0.000431
regulation of localization (GO:0032879)	2914	88	47.58	+	1.85	0.000112
response to organic substance (GO:0010033)	2581	76	42.14	+	1.8	0.00536
response to stress (GO:0006950)	3272	96	53.42	+	1.8	0.0000918
response to chemical (GO:0042221)	3549	104	57.94	+	1.79	0.0000135
positive regulation of response to stimulus (GO:0048584)	2297	67	37.5	+	1.79	0.0331
system development (GO:0048731)	4226	123	69	+	1.78	0.000000334
positive regulation of macromolecule metabolic process (GO:0010604)	3389	95	55.33	+	1.72	0.000875
animal organ development (GO:0048513)	3185	89	52	+	1.71	0.00321
multicellular organism development (GO:0007275)	4840	134	79.02	+	1.7	0.000000837
positive regulation of metabolic process (GO:0009893)	3717	102	60.69	+	1.68	0.000769
regulation of response to stimulus (GO:0048583)	3964	107	64.72	+	1.65	0.000751
positive regulation of cellular metabolic process (GO:0031325)	3190	86	52.08	+	1.65	0.0236
positive regulation of cellular process (GO:0048522)	5836	156	95.28	+	1.64	8.69E-08
negative regulation of cellular process (GO:0048523)	4932	131	80.53	+	1.63	0.0000214
anatomical structure development (GO:0048856)	5230	138	85.39	+	1.62	0.0000093
regulation of biological quality (GO:0065008)	3874	101	63.25	+	1.6	0.0117
developmental process (GO:0032502)	5624	146	91.82	+	1.59	0.00000734
positive regulation of biological process (GO:0048518)	6356	164	103.77	+	1.58	0.000000303
cellular component organization (GO:0016043)	5261	135	85.9	+	1.57	0.000103
negative regulation of biological process (GO:0048519)	5376	137	87.77	+	1.56	0.000132
cellular component organization or biogenesis (GO:0071840)	5452	136	89.02	+	1.53	0.000476
response to stimulus (GO:0050896)	8591	187	140.27	+	1.33	0.00759
Unclassified (UNCLASSIFIED)	1305	18	21.31	-	0.84	0
