# Supplementary material for: 8-Oxoguanine DNA Glycosylase (OGG1) Deficiency Exacerbates Doxorubicin-Induced Cardiac Dysfunction
Source: Oxid Med Cell Longev. 2022 Mar 27;2022:9180267. doi: 10.1155/2022/9180267 (PMC8981022; doi:10.1155/2022/9180267)
Supplement: Supplementary 10 — Supplementary Table 10: differentially expressed genes between KO doxorubicin-treated and WT doxorubicin-treated CMs. [file 9180267.f10.txt]

	logFC	logCPM	LR	PValue	FDR	hgnc	biotype	WT_DXB3	WT_DXB1	KO_DXB2	KO_DXB1
ENSMUSG00000056071.6	2.118074991	0.202488364	11.14439322	0.00084286	0.172335145	S100a9	protein_coding	0.539262617	0.488428453	1.265197674	2.884362445
ENSMUSG00000020469.8	1.881585397	2.99274003	8.459177187	0.003632061	0.280387755	Myl7	protein_coding	1.280170603	2.536393038	7.133284311	6.35174263
ENSMUSG00000037362.8	1.71646037	1.016727854	14.12101486	0.000171418	0.070457426	Nov	protein_coding	0.244306301	0.339290645	0.443260945	1.347989954
ENSMUSG00000073478.5	1.577070065	-1.069167616	8.971563117	0.002742139	0.253141179	D730003I15Rik	lincRNA	0.085589388	0.697690918	1.285162261	0.939680995
ENSMUSG00000050234.7	1.241543371	2.156170033	7.695645349	0.005535421	0.330128191	Gja4	protein_coding	1.274941148	1.631722505	1.48260419	4.821883329
ENSMUSG00000046223.9	1.232497198	0.032008185	10.65750407	0.001096252	0.175492677	Plaur	protein_coding	0.638069194	0.304168907	1.134578994	0.935934136
ENSMUSG00000020427.5	1.218043116	2.542895405	7.535997503	0.006047824	0.345800088	Igfbp3	protein_coding	1.134435981	1.243812361	1.428843402	3.630580407
ENSMUSG00000020811.10	1.218027929	1.588205499	7.195383623	0.007309136	0.357795158	Wscd1	protein_coding	0.305590561	0.444831014	0.378967258	1.216670581
ENSMUSG00000089671.1	1.217455328	-0.35955792	9.103511912	0.002551192	0.248751809	Gm16537	processed_transcript	0.467129491	0.967074362	1.377780357	1.63438518
ENSMUSG00000055413.9	1.216055593	1.384105855	14.23014464	0.000161758	0.070457426	H2-Q8	processed_transcript	0.883883073	0.723089067	1.284376709	2.215328433
ENSMUSG00000045730.3	1.208772501	0.907329306	7.10765442	0.007675548	0.366862471	Adrb2	protein_coding	0.391985011	0.453654718	0.408737997	1.397744266
ENSMUSG00000090399.1	1.20840689	-0.040629106	9.330347057	0.002253897	0.233178639	Nav1	protein_coding	0.425863205	0.308575006	0.612808465	1.007036752
ENSMUSG00000037405.7	1.206606173	3.570228076	15.88360603	6.73597E-05	0.048781238	Icam1	protein_coding	3.204280159	2.652033449	5.582154031	6.90528128
ENSMUSG00000027314.6	1.191225026	3.085338566	11.07235949	0.000876241	0.173720955	Dll4	protein_coding	1.177996091	1.319939427	1.89190038	3.394824128
ENSMUSG00000026879.7	1.186633891	7.407240568	7.776328466	0.005293527	0.324799425	Gsn	protein_coding	26.23568894	30.50341527	32.77215337	85.70635554
ENSMUSG00000050295.2	1.173683647	1.494600748	8.174281385	0.00424885	0.295553578	Foxc1	protein_coding	0.526217031	0.561343756	0.614551771	1.639372499
ENSMUSG00000004791.6	1.147818273	0.702236222	9.972474676	0.001588978	0.204907799	Pgf	protein_coding	0.681182842	0.482846413	0.833825514	1.575772746
ENSMUSG00000050914.9	1.128788098	0.744396884	7.153850769	0.007480321	0.362869852	Ankrd37	protein_coding	0.567228668	0.87641114	0.845456128	2.085250057
ENSMUSG00000036867.5	1.092195871	2.554658876	8.313558286	0.003935023	0.289100594	Smad6	protein_coding	1.236549331	1.619254979	1.789622311	3.812353418
ENSMUSG00000000031.9	1.083476728	3.309531368	8.839681906	0.002947505	0.25469124	H19	processed_transcript	3.309359943	2.069633064	3.752742999	6.687717947
ENSMUSG00000048489.6	1.080735896	4.70487765	14.34327634	0.000152323	0.070457426	8430408G22Rik	protein_coding	17.48789708	13.68676811	22.90325291	37.68673222
ENSMUSG00000092569.1	1.079285182	-0.74236511	6.740210113	0.009426352	0.399486052	RP24-263P17.1	processed_transcript	0.610197598	0.675493711	1.654319516	0.916146945
ENSMUSG00000040289.3	1.071434651	2.330036001	8.8557417	0.002921684	0.25469124	Hey1	protein_coding	1.400659817	1.326289909	1.593297161	3.674174397
ENSMUSG00000073421.4	1.066788906	2.598998399	10.92243861	0.000950065	0.175202703	H2-Ab1	protein_coding	0.940333011	0.877500354	1.256850615	2.238040095
ENSMUSG00000018604.11	1.065847192	2.073210628	8.104215629	0.004416243	0.300136515	Tbx3	protein_coding	0.5225491	0.512731325	0.653858693	1.338641896
ENSMUSG00000044921.4	1.063954725	1.919320118	7.049600503	0.007928293	0.372212828	Rassf9	protein_coding	1.036092707	0.858558426	0.951648685	2.662281459
ENSMUSG00000026463.10	1.059389954	3.564907744	9.664781386	0.001878341	0.214588665	Atp2b4	protein_coding	0.865258039	0.661681398	0.923848662	1.982186643
ENSMUSG00000027859.4	1.049800894	0.323368652	7.50534804	0.006151605	0.345800088	Ngf	protein_coding	0.354874004	0.964264287	1.184130908	1.431915217
ENSMUSG00000026121.7	1.049362928	2.48263289	9.001623968	0.002697398	0.253141179	Sema4c	protein_coding	0.795453624	0.840547566	0.985769888	2.127327658
ENSMUSG00000048218.5	1.043211702	1.766931333	10.69242204	0.001075753	0.175492677	Amigo2	protein_coding	0.812935105	0.780481088	1.235915999	1.812495665
ENSMUSG00000015396.2	1.028273852	0.925977114	7.255947158	0.007066659	0.354404543	Cd83	protein_coding	0.647284112	0.245853982	0.627048731	1.093306964
ENSMUSG00000027276.7	1.024900073	3.510302142	6.904508079	0.008597868	0.382328582	Jag1	protein_coding	1.149674067	1.339853026	1.350547272	3.31341391
ENSMUSG00000085643.1	1.001138077	0.845977577	10.96356222	0.00092921	0.174462076	Gm12519	processed_transcript	1.563940198	2.03238924	3.573537919	3.101010506
ENSMUSG00000041378.1	0.968874145	3.174557121	6.876593491	0.008733186	0.386088048	Cldn5	protein_coding	4.390620505	4.42523783	4.802020612	11.04044599
ENSMUSG00000021922.9	0.965874538	1.383567523	7.526178387	0.006080877	0.345800088	Itih4	protein_coding	0.53795333	0.615464321	0.677562311	1.398827096
ENSMUSG00000015083.5	0.951439326	0.102917043	6.700597362	0.009638062	0.402680329	C8g	protein_coding	0.470540178	0.568245611	1.000927063	0.87425186
ENSMUSG00000091383.1	0.946657571	-0.014043076	7.187736196	0.007340353	0.357795158	Hist1h2al	protein_coding	1.732220236	2.465462456	3.251255985	4.284262771
ENSMUSG00000001504.8	0.945613757	1.588845644	14.28416953	0.000157181	0.070457426	Irx2	protein_coding	0.792292422	0.717606135	1.433967445	1.278493205
ENSMUSG00000027962.9	0.941880755	3.456737067	7.344070989	0.006728429	0.35043135	Vcam1	protein_coding	1.62553556	1.300103574	1.614719167	3.516346356
ENSMUSG00000026605.7	0.941772771	4.226685253	8.513620173	0.003524981	0.27632944	Cenpf	protein_coding	1.290590531	1.243385887	3.07807912	1.544671055
ENSMUSG00000043795.2	0.929969128	2.321956073	7.432889807	0.006404242	0.345800088	Gm14492	protein_coding	0.955212621	1.604166572	2.222408235	2.386515891
ENSMUSG00000033446.6	0.926734183	1.75979905	7.991277109	0.004700325	0.302892119	Lpar6	protein_coding	0.79413907	1.010415326	1.330842304	1.884284394
ENSMUSG00000038296.8	0.921344337	2.330924032	7.210223441	0.007248947	0.357795158	Galntl4	protein_coding	1.619154935	1.318223438	1.604886472	3.47235414
ENSMUSG00000041801.5	0.921154023	1.668997802	10.37689038	0.001276024	0.188405605	Phlda3	protein_coding	1.918610441	1.982121765	2.728956576	4.126782738
ENSMUSG00000086429.3	0.915607502	0.444122733	6.725666675	0.00950352	0.400109986	Gt(ROSA)26Sor	lincRNA	0.496236344	0.624247358	0.931400841	1.024438547
ENSMUSG00000030987.4	0.915315509	2.551184757	9.091506362	0.002567993	0.248751809	Stim1	protein_coding	1.092965739	1.213850293	1.66067341	2.373548906
ENSMUSG00000038587.7	0.881221015	4.257616621	8.984263007	0.002723146	0.253141179	Akap12	protein_coding	1.951067703	2.078599644	2.679867098	4.204585933
ENSMUSG00000022623.9	0.874486793	4.089382135	7.48776218	0.006211971	0.345800088	Shank3	protein_coding	1.556275929	1.30956851	1.603600974	3.21033503
ENSMUSG00000063060.5	0.845643244	2.603798048	8.563839801	0.003429054	0.274468722	Sox7	protein_coding	1.401084775	1.102372349	1.540654546	2.605570833
ENSMUSG00000050919.8	0.841572345	2.093579888	8.774174758	0.003055254	0.258689781	Zfp366	protein_coding	1.167001062	0.842530226	1.349146613	1.985427952
ENSMUSG00000067455.3	0.835033702	2.133473196	9.014536847	0.002678408	0.253001375	Hist1h4j	protein_coding	8.102863872	11.30608679	13.97538538	18.40251036
ENSMUSG00000006362.9	0.823433973	1.656029751	7.299086869	0.006898966	0.351707056	Cbfa2t3	protein_coding	0.529179765	0.452668513	0.597779321	1.026238553
ENSMUSG00000023046.6	0.78975688	2.665390437	7.308080306	0.006864522	0.351500517	Igfbp6	protein_coding	2.904863653	4.804496126	6.005349824	6.506462377
ENSMUSG00000026773.10	0.78786392	2.622863889	10.30703807	0.001325238	0.191944966	Pfkfb3	protein_coding	0.751929022	0.825694919	1.467521011	1.101467397
ENSMUSG00000032338.8	0.763865599	1.64023648	8.066825731	0.004508303	0.301275946	Hcn4	protein_coding	0.566154605	0.73573563	1.21278711	0.862725184
ENSMUSG00000027684.9	0.742807043	3.18895691	8.187030256	0.004219093	0.295553578	Mecom	protein_coding	0.684934022	0.668396477	0.850137088	1.250198631
ENSMUSG00000064220.4	0.727336659	4.017491576	8.175148759	0.004246819	0.295553578	Hist2h2aa2	protein_coding	27.16313465	31.70510137	38.92028712	51.88853064
ENSMUSG00000063953.2	0.66778977	3.940997733	9.646125037	0.001897514	0.214588665	Amd2	protein_coding	3.935774504	4.990670351	6.689495475	6.647791273
ENSMUSG00000036752.4	0.583657852	7.574188677	6.917165445	0.008537219	0.382072424	Tubb2c	protein_coding	106.9842717	95.60243195	151.9452041	132.2779976
ENSMUSG00000038463.8	0.580367235	3.249056224	7.476301732	0.006251635	0.345800088	Olfml2b	protein_coding	4.034512395	3.161494373	5.133415582	4.913123642
ENSMUSG00000020657.8	0.543145081	3.080568518	7.281616246	0.006966383	0.351975914	Dnajc27	protein_coding	1.742473517	1.741481268	2.603243354	2.173537976
ENSMUSG00000048897.8	0.507197269	3.556411894	7.083159491	0.00778117	0.367503189	Zfp710	protein_coding	2.382886365	2.369682539	3.130757496	3.195243944
ENSMUSG00000007097.8	-0.509898552	9.272443558	7.144581567	0.007519082	0.363016485	Atp1a2	protein_coding	142.4986707	111.6225196	96.81842848	70.47270643
ENSMUSG00000020541.6	-0.526856857	3.127139821	6.83908798	0.008918436	0.388145615	Tom1l1	protein_coding	1.658612554	1.393006284	1.081094563	0.901576726
ENSMUSG00000024197.9	-0.533817648	7.111763054	8.102371664	0.004420738	0.300136515	Plin3	protein_coding	115.9974948	84.51776394	65.34831272	63.31295192
ENSMUSG00000036833.9	-0.550274813	3.91870614	7.406380893	0.006499294	0.345800088	Pnpla7	protein_coding	3.7554422	2.727936703	2.204918373	1.920901807
ENSMUSG00000009733.7	-0.568243186	2.570880405	7.360128348	0.006668603	0.35043135	Tcfcp2	protein_coding	2.939887585	2.409160151	1.891873016	1.489701126
ENSMUSG00000021913.7	-0.595718617	6.625167106	9.622827079	0.001921737	0.214588665	Ogdhl	protein_coding	42.13821704	37.91930337	26.45722271	23.13050359
ENSMUSG00000035561.5	-0.610336599	3.121588078	7.410902194	0.006482981	0.345800088	Aldh1b1	protein_coding	6.155837784	4.894708307	3.813226438	2.951142338
ENSMUSG00000034614.8	-0.617706	4.715961031	9.052102204	0.002623929	0.251305862	Pik3ip1	protein_coding	11.19684143	8.576579225	7.193357594	4.903512237
ENSMUSG00000034858.8	-0.640007722	4.55172754	8.1484645	0.004309764	0.295553578	BC031353	protein_coding	6.970124281	4.836526574	4.134158189	2.949372723
ENSMUSG00000031167.8	-0.641602881	5.08706416	8.314857786	0.003932208	0.289100594	Rbm3	protein_coding	15.67798022	9.589780509	7.930405708	7.086275563
ENSMUSG00000025701.6	-0.656633292	2.587349347	7.658776688	0.00564968	0.334289081	Alox5	protein_coding	1.515375372	1.857555205	0.994419412	1.010357464
ENSMUSG00000019810.9	-0.669795112	6.592191052	7.010659655	0.008102582	0.372212828	Fuca2	protein_coding	35.00930068	20.33145947	18.6685849	13.70125823
ENSMUSG00000053192.5	-0.673431604	1.705159327	7.931530284	0.004858069	0.309127692	Mllt11	protein_coding	2.986717652	2.353279305	1.64073943	1.497025123
ENSMUSG00000022089.8	-0.674739014	1.610365411	7.979584321	0.00473078	0.303568385	Bin3	protein_coding	2.821233284	2.604903948	1.722243833	1.457335335
ENSMUSG00000038178.9	-0.675370437	3.042067029	9.386098159	0.00218637	0.229312564	Slc43a2	protein_coding	1.586669304	1.057806918	0.816566782	0.723047844
ENSMUSG00000051169.8	-0.696675575	1.609067826	6.911537751	0.008564131	0.382072424	Rpusd3	protein_coding	2.079905606	1.883841093	1.443606412	0.859978159
ENSMUSG00000022219.8	-0.700551246	1.741741048	6.721841763	0.009523923	0.400109986	Cideb	protein_coding	5.294298564	3.121152941	2.351959141	2.434034463
ENSMUSG00000042389.7	-0.702284574	2.07834423	9.43448617	0.002129427	0.226463863	Tsen2	protein_coding	1.016257437	0.881010613	0.606294696	0.484306127
ENSMUSG00000028194.9	-0.755559533	1.591278141	6.997123205	0.008164081	0.372212828	Ddah1	protein_coding	1.302573588	0.829038182	0.682792968	0.495526021
ENSMUSG00000030838.9	-0.771940168	1.546043467	7.651520952	0.005672448	0.334289081	Ush1c	protein_coding	1.448879177	1.103260256	0.890437637	0.519771109
ENSMUSG00000072969.2	-0.777946501	2.067858317	8.230246048	0.004119794	0.295553578	Armcx5	protein_coding	1.769149784	1.234130409	0.98998365	0.649611851
ENSMUSG00000032420.6	-0.779735491	3.570295864	9.258523788	0.002344019	0.236078402	Nt5e	protein_coding	7.589317193	4.105411433	3.469213828	2.846187122
ENSMUSG00000091747.2	-0.78186785	1.424428101	8.550451551	0.003454365	0.275047054	D17H6S56E-5	protein_coding	1.028015787	0.772397061	0.504304688	0.473560555
ENSMUSG00000033126.4	-0.81879518	1.965195753	9.438544999	0.00212472	0.226463863	Ybey	protein_coding	1.219103772	1.291333431	0.775651641	0.558413376
ENSMUSG00000030272.8	-0.834698576	4.877850504	14.19417205	0.00016488	0.070457426	Camk1	protein_coding	10.1143776	6.609259075	4.57262482	4.134453245
ENSMUSG00000024803.8	-0.841089911	10.12295411	7.788045827	0.005259305	0.324799425	Ankrd1	protein_coding	1784.616234	850.8518219	841.9619611	526.5064149
ENSMUSG00000003526.5	-0.858184669	4.048105675	9.598640948	0.001947214	0.214588665	Prodh	protein_coding	9.562203466	5.851568577	3.622565116	4.20938132
ENSMUSG00000020534.8	-0.862848861	2.916083054	7.413465722	0.00647375	0.345800088	Shmt1	protein_coding	4.172593292	2.708833291	2.501153188	1.06939076
ENSMUSG00000026107.5	-0.885002268	4.458693369	7.420774629	0.006447505	0.345800088	Obfc2a	protein_coding	18.49649755	8.773192717	8.609351853	5.137175501
ENSMUSG00000038550.4	-0.893700681	2.354971089	10.44867205	0.001227377	0.183434475	Gm129	protein_coding	6.329819158	3.559787859	2.678964901	2.271069368
ENSMUSG00000045094.6	-0.898947547	1.401867156	9.611295424	0.001933842	0.214588665	Arhgef37	protein_coding	1.413907705	0.865286616	0.478163184	0.656213391
ENSMUSG00000038670.8	-0.901295522	4.242352991	11.40026218	0.000734337	0.157293006	Mybpc2	protein_coding	13.90015599	7.485533997	5.520836902	5.067182171
ENSMUSG00000028158.8	-0.909971258	2.896543309	10.75593579	0.001039454	0.175492677	Mttp	protein_coding	3.687910018	2.214008674	1.85516203	1.08605891
ENSMUSG00000087259.1	-0.937773237	1.156894674	9.988844372	0.001574914	0.204907799	2610035D17Rik	lincRNA	1.432894169	1.896815128	0.951648685	0.688842056
ENSMUSG00000055782.7	-0.945624727	1.885676994	7.737963913	0.005407174	0.328929183	Abcd2	protein_coding	1.547264381	0.742823805	0.729994061	0.378448231
ENSMUSG00000049092.10	-0.976137188	1.18498648	13.41678429	0.000249383	0.086661235	Gpr137c	protein_coding	1.194753225	0.909448456	0.57254504	0.429365871
ENSMUSG00000066829.5	-0.978011589	1.194913771	10.21850924	0.001390382	0.193113316	Zfp810	protein_coding	3.006164558	1.774399383	1.299644765	0.96988185
ENSMUSG00000044835.9	-0.992624704	0.924224981	8.819019178	0.002981069	0.256136108	Ankrd45	protein_coding	1.956067266	1.06662157	0.974045209	0.455133335
ENSMUSG00000039114.9	-0.997635551	2.614004238	13.51169292	0.000237082	0.086661235	Nrn1	protein_coding	6.300680755	4.867513858	2.906795246	2.325203825
ENSMUSG00000030271.8	-1.005663663	1.11068059	12.45587224	0.00041668	0.115122497	Ogg1	protein_coding	1.473523122	1.58486113	0.626603823	0.797219677
ENSMUSG00000069835.4	-1.023374672	0.385448119	10.03853741	0.001532989	0.204506076	Sat2	protein_coding	1.479266903	1.250500754	0.740394749	0.499716516
ENSMUSG00000045932.6	-1.048718058	3.029569519	8.347804812	0.003861536	0.286469452	Ifit2	protein_coding	5.659851894	2.369307535	1.573386024	1.96820965
ENSMUSG00000061816.9	-1.049815281	4.044451138	13.32331537	0.000262126	0.086661235	Myl1	protein_coding	21.40269325	10.05244556	7.482412091	6.509793713
ENSMUSG00000048004.7	-1.05724555	-0.279141455	7.835940702	0.005121749	0.319227714	Tmem196	protein_coding	1.122073933	1.088893329	0.413689205	0.575346578
ENSMUSG00000037341.7	-1.088490786	1.048287834	9.796477952	0.001748464	0.208849342	Slc9a7	protein_coding	1.25175324	0.72249118	0.529778642	0.342018552
ENSMUSG00000027875.6	-1.099853355	3.337683619	9.912704656	0.001641417	0.205667382	Hmgcs2	protein_coding	7.437796082	6.092623761	3.323226841	2.594260009
ENSMUSG00000039239.8	-1.112568402	2.448155299	11.12898562	0.000849891	0.172335145	Tgfb2	protein_coding	3.687676872	1.512642298	1.096207902	1.11693329
ENSMUSG00000037827.3	-1.126352539	0.40817968	10.69032619	0.001076972	0.175492677	Gm5884	protein_coding	1.451776693	1.286338128	0.710839072	0.453114626
ENSMUSG00000019796.5	-1.162189264	1.237867476	11.34925865	0.000754781	0.159426504	Lrp11	protein_coding	1.873506784	0.817484033	0.603185124	0.508164767
ENSMUSG00000031574.6	-1.248994435	1.088442945	7.528221321	0.006073985	0.345800088	Star	protein_coding	2.230484357	0.63994717	0.689076179	0.432904601
ENSMUSG00000037594.3	-1.251160061	0.445028618	15.37909325	8.79561E-05	0.058158103	BC022687	protein_coding	1.465326168	1.083876438	0.641740056	0.350630061
ENSMUSG00000034855.7	-1.295088621	-0.030647593	10.26904041	0.001352811	0.192276231	Cxcl10	protein_coding	1.353847968	0.72458812	0.288758836	0.519713966
ENSMUSG00000033578.7	-1.459896579	0.372624396	7.909837005	0.00491667	0.310260234	Tmem35	protein_coding	1.144244347	0.418962506	0.2970177	0.2261678
ENSMUSG00000001506.9	-1.465036876	3.604002335	6.739469481	0.009430266	0.399486052	Col1a1	protein_coding	6.949290409	1.505418859	0.988334881	1.742522465
ENSMUSG00000050359.6	-1.635199821	0.348035568	8.218318984	0.00414696	0.295553578	Sprr1a	protein_coding	8.221395631	1.425905815	1.258555386	1.526529848
ENSMUSG00000026043.11	-1.70122332	6.109063504	10.55644532	0.001157836	0.179677311	Col3a1	protein_coding	28.95610146	7.185834568	4.008718852	5.977850583
ENSMUSG00000037145.8	-1.708022904	0.593630039	9.488420362	0.002067728	0.226230237	2210407C18Rik	protein_coding	2.678892539	0.697579617	0.471383771	0.452483201
ENSMUSG00000031972.3	-1.737819957	7.600099446	14.51904093	0.00013875	0.070457426	Acta1	protein_coding	541.4397162	178.5676095	121.0756367	78.04948053
ENSMUSG00000050195.8	-1.753008489	3.086057052	15.62044673	7.7413E-05	0.053513476	Scd4	protein_coding	7.712372824	2.425783417	1.67563022	1.09952245
ENSMUSG00000027750.9	-1.837221319	3.719775068	10.99447318	0.00091384	0.173720955	Postn	protein_coding	7.245202999	1.308120881	0.85692214	1.285254767
ENSMUSG00000021091.8	-1.932460623	4.149113587	8.018424301	0.004630384	0.301275946	Serpina3n	protein_coding	47.57506281	7.038090327	4.42223148	8.265345147
ENSMUSG00000001131.5	-2.029804125	1.507352709	9.049679503	0.002627409	0.251305862	Timp1	protein_coding	18.08730838	2.347170065	1.439341662	2.992538945
ENSMUSG00000029304.8	-2.743120428	-0.259886604	18.72898916	1.50674E-05	0.01636754	Spp1	protein_coding	2.75895304	0.489470831	0.266925851	0.192167408
ENSMUSG00000028364.8	-3.358356897	1.694323527	22.95887531	1.65504E-06	0.003595699	Tnc	protein_coding	2.873701154	0.40086641	0.099450658	0.184257805
