# Supplementary material for: 8-Oxoguanine DNA Glycosylase (OGG1) Deficiency Exacerbates Doxorubicin-Induced Cardiac Dysfunction
Source: Oxid Med Cell Longev. 2022 Mar 27;2022:9180267. doi: 10.1155/2022/9180267 (PMC8981022; doi:10.1155/2022/9180267)
Supplement: Supplementary 11 — Supplementary Table 11: gene ontology terms in upregulated genes in the KO doxorubicin-treated CMs compared to WT doxorubicin-treated CMs. [file 9180267.f11.txt]

Analysis Type:	PANTHER Overrepresentation Test (Released 20210224)					
Annotation Version and Release Date:	GO Ontology database DOI:  10.5281/zenodo.5080993 Released 2021-07-02					
Analyzed List:	upload_1 (Mus musculus)					
Reference List:	Mus musculus (all genes in database)					
Test Type:	FISHER					
Correction:	BONFERRONI					
Bonferroni count:	9132					
GO biological process complete	Mus musculus - REFLIST (21988)	upload_1 (51)	upload_1 (expected)	upload_1 (over/under)	upload_1 (fold Enrichment)	upload_1 (P-value)
Notch signaling involved in heart development (GO:0061314)	7	3	0.02	+	 > 100	0.0126
nephron epithelium development (GO:0072009)	98	5	0.23	+	22	0.0366
artery development (GO:0060840)	103	5	0.24	+	20.93	0.0462
kidney epithelium development (GO:0072073)	134	6	0.31	+	19.3	0.00767
cardiac ventricle development (GO:0003231)	142	6	0.33	+	18.22	0.0106
cardiac chamber morphogenesis (GO:0003206)	143	6	0.33	+	18.09	0.011
mesenchymal cell differentiation (GO:0048762)	164	6	0.38	+	15.77	0.0238
urogenital system development (GO:0001655)	356	9	0.83	+	10.9	0.00128
renal system development (GO:0072001)	317	8	0.74	+	10.88	0.00687
tube morphogenesis (GO:0035239)	740	11	1.72	+	6.41	0.00838
epithelium development (GO:0060429)	1075	14	2.49	+	5.61	0.00101
embryo development (GO:0009790)	1208	13	2.8	+	4.64	0.0263
regulation of multicellular organismal development (GO:2000026)	1474	15	3.42	+	4.39	0.00745
tissue development (GO:0009888)	1682	16	3.9	+	4.1	0.00703
nervous system development (GO:0007399)	2110	17	4.89	+	3.47	0.0281
positive regulation of response to stimulus (GO:0048584)	2297	18	5.33	+	3.38	0.0191
regulation of developmental process (GO:0050793)	2562	20	5.94	+	3.37	0.00419
regulation of signal transduction (GO:0009966)	2845	20	6.6	+	3.03	0.0221
regulation of multicellular organismal process (GO:0051239)	2852	20	6.62	+	3.02	0.023
cell differentiation (GO:0030154)	3625	24	8.41	+	2.85	0.00347
cellular developmental process (GO:0048869)	3678	24	8.53	+	2.81	0.00456
regulation of response to stimulus (GO:0048583)	3964	24	9.19	+	2.61	0.0184
system development (GO:0048731)	4226	25	9.8	+	2.55	0.0148
multicellular organism development (GO:0007275)	4840	28	11.23	+	2.49	0.00309
positive regulation of cellular process (GO:0048522)	5836	32	13.54	+	2.36	0.000608
anatomical structure development (GO:0048856)	5230	28	12.13	+	2.31	0.0246
developmental process (GO:0032502)	5624	30	13.04	+	2.3	0.00732
positive regulation of biological process (GO:0048518)	6356	33	14.74	+	2.24	0.00141
Unclassified (UNCLASSIFIED)	1305	1	3.03	-	0.33	0
